# Supplementary material for: Incidence of delirium in the Canadian emergency department and its consequences on hospital length of stay: a prospective observational multicentre cohort study
Source: PubMed Central journal article supplement — BMJ Open. 2018 Mar 8;8(3):e018190. doi: 10.1136/bmjopen-2017-018190 (PMC5855334; doi:10.1136/bmjopen-2017-018190), 2018-03-08
Supplement: bmjopen-2017-018190.draft_revisions.pdf [file bmjopen-2017-018190.draft_revisions.pdf]

# BMJ Open

BMJ Open is committed to open peer review. As part of this commitment we make the peer review history of every article we publish publicly available.

When an article is published we post the peer reviewers' comments and the authors' responses online. We also post the versions of the paper that were used during peer review. These are the versions that the peer review comments apply to.

The versions of the paper that follow are the versions that were submitted during the peer review process. They are not the versions of record or the final published versions. They should not be cited or distributed as the published version of this manuscript.

BMJ Open is an open access journal and the full, final, typeset and author-corrected version of record of the manuscript is available on our site with no access controls, subscription charges or pay-per-view fees (<http://bmjopen.bmj.com>).

If you have any questions on BMJ Open's open peer review process please email [info.bmjopen@bmj.com](mailto:info.bmjopen@bmj.com)

# BMJ Open

## Incidence of delirium in the Emergency Department and its consequences on hospital length of stay

|                                 |                                                                                                                                                                                                                                                                                                                                                                                                                                                                                                                                                                                                                                                                                                                                                                                                                                                                                                                                                                                                                                                                                                                                                                                                                                                                                                                                                                                                                                                                                                                                                                                                                                                                                                                                                                                                                                                                                                                                                                                                                                                                                                                                                               |
|---------------------------------|---------------------------------------------------------------------------------------------------------------------------------------------------------------------------------------------------------------------------------------------------------------------------------------------------------------------------------------------------------------------------------------------------------------------------------------------------------------------------------------------------------------------------------------------------------------------------------------------------------------------------------------------------------------------------------------------------------------------------------------------------------------------------------------------------------------------------------------------------------------------------------------------------------------------------------------------------------------------------------------------------------------------------------------------------------------------------------------------------------------------------------------------------------------------------------------------------------------------------------------------------------------------------------------------------------------------------------------------------------------------------------------------------------------------------------------------------------------------------------------------------------------------------------------------------------------------------------------------------------------------------------------------------------------------------------------------------------------------------------------------------------------------------------------------------------------------------------------------------------------------------------------------------------------------------------------------------------------------------------------------------------------------------------------------------------------------------------------------------------------------------------------------------------------|
| Journal:                        | <i>BMJ Open</i>                                                                                                                                                                                                                                                                                                                                                                                                                                                                                                                                                                                                                                                                                                                                                                                                                                                                                                                                                                                                                                                                                                                                                                                                                                                                                                                                                                                                                                                                                                                                                                                                                                                                                                                                                                                                                                                                                                                                                                                                                                                                                                                                               |
| Manuscript ID                   | bmjopen-2017-018190                                                                                                                                                                                                                                                                                                                                                                                                                                                                                                                                                                                                                                                                                                                                                                                                                                                                                                                                                                                                                                                                                                                                                                                                                                                                                                                                                                                                                                                                                                                                                                                                                                                                                                                                                                                                                                                                                                                                                                                                                                                                                                                                           |
| Article Type:                   | Research                                                                                                                                                                                                                                                                                                                                                                                                                                                                                                                                                                                                                                                                                                                                                                                                                                                                                                                                                                                                                                                                                                                                                                                                                                                                                                                                                                                                                                                                                                                                                                                                                                                                                                                                                                                                                                                                                                                                                                                                                                                                                                                                                      |
| Date Submitted by the Author:   | 16-Jun-2017                                                                                                                                                                                                                                                                                                                                                                                                                                                                                                                                                                                                                                                                                                                                                                                                                                                                                                                                                                                                                                                                                                                                                                                                                                                                                                                                                                                                                                                                                                                                                                                                                                                                                                                                                                                                                                                                                                                                                                                                                                                                                                                                                   |
| Complete List of Authors:       | <p>Emond, Marcel; Universite Laval Faculte de medecine, Médecine d'urgence; Centre de recherche du CHU de Québec-Université Laval, Axe Santé des populations et pratiques optimales en santé</p> <p>Boucher, Valérie; Centre de recherche du CHU de Québec-Université Laval, Axe Santé des populations et pratiques optimales en santé; Centre d'excellence sur le vieillissement de Québec</p> <p>Carmichael, Pierre-Hugues; Centre d'excellence sur le vieillissement de Québec</p> <p>Voyer, Philippe; Universite Laval Faculte de medecine; Centre de recherche du CHU de Québec-Université Laval, Axe Santé des populations et pratiques optimales en santé</p> <p>Pelletier, Mathieu; Université Laval; 7Centre Intégré de Santé et de Services Sociaux de Lanaudière</p> <p>Gouin, Émilie; Centre Hospitalier Régional de Trois-Rivières</p> <p>Daoust, Raoul; Hôpital Sacré-Coeur de Montréal; Université de Montréal</p> <p>Berthelot, Simon; Centre de recherche du CHU de Québec, Axe Santé des populations et pratiques optimales en santé; CHU de Québec-Université Laval, Médecine d'urgence</p> <p>Lamontagne, Marie-Ève; 6Centre interdisciplinaire de recherche en réadaptation et intégration sociale; Université Laval</p> <p>Morin, Michèle; Université Laval; Centre de recherche du CHU de Québec-Université Laval, Axe Santé des populations et pratiques optimales en santé</p> <p>Lemire, Stéphane; Université Laval; Centre de recherche du CHU de Québec-Université Laval, Axe Santé des populations et pratiques optimales en santé</p> <p>Thien Tuong, Minh Vu; Institut de gériatrie de l'Université de Montréal; 11Centre de recherche du Centre hospitalier de l'Université de Montréal</p> <p>Rheault, Marcel; CSSS de Trois-Rivières</p> <p>Juneau, Lucille; Centre Intégré Universitaire de Services Sociaux et de Santé de la Capitale-Nationale</p> <p>Le Sage, Natalie; Centre de recherche du CHU de Québec-Université Laval, Axe Santé des populations et pratiques optimales en santé; CHU de Québec-Université Laval, Médecine d'urgence</p> <p>Lee, Jacques; University of Toronto, Clinical Epidemiology Unit</p> |
| <b>Primary Subject Heading</b>: | Emergency medicine                                                                                                                                                                                                                                                                                                                                                                                                                                                                                                                                                                                                                                                                                                                                                                                                                                                                                                                                                                                                                                                                                                                                                                                                                                                                                                                                                                                                                                                                                                                                                                                                                                                                                                                                                                                                                                                                                                                                                                                                                                                                                                                                            |
| Secondary Subject Heading:      | Geriatric medicine                                                                                                                                                                                                                                                                                                                                                                                                                                                                                                                                                                                                                                                                                                                                                                                                                                                                                                                                                                                                                                                                                                                                                                                                                                                                                                                                                                                                                                                                                                                                                                                                                                                                                                                                                                                                                                                                                                                                                                                                                                                                                                                                            |
| Keywords:                       | Delirium, Emergency Department, Community seniors, Cognitive status,                                                                                                                                                                                                                                                                                                                                                                                                                                                                                                                                                                                                                                                                                                                                                                                                                                                                                                                                                                                                                                                                                                                                                                                                                                                                                                                                                                                                                                                                                                                                                                                                                                                                                                                                                                                                                                                                                                                                                                                                                                                                                          |

1  
2  
3  
4  
5  
6  
7  
8  
9  
10  
11  
12  
13  
14  
15  
16  
17  
18  
19  
20  
21  
22  
23  
24  
25  
26  
27  
28  
29  
30  
31  
32  
33  
34  
35  
36  
37  
38  
39  
40  
41  
42  
43  
44  
45  
46  
47  
48  
49  
50  
51  
52  
53  
54  
55  
56  
57  
58  
59  
60

|  |                   |
|--|-------------------|
|  | Functional status |
|  |                   |

SCHOLARONE™  
Manuscripts

For peer review only

## Incidence of delirium in the Emergency Department and its consequences on hospital length of stay.

Marcel Émond, MD, MSc<sup>1-2-3-4-5</sup>, Valérie Boucher, BA<sup>1-3-4-6</sup>, Pierre-Hugues Carmichael, MSc<sup>4</sup>, Philippe Voyer RN, PhD<sup>1-3-4</sup>, Mathieu Pelletier, MD<sup>3-7</sup>, Émilie Gouin, MD<sup>8</sup>, Raoul Daoust, MD MSc<sup>9-10</sup>, Simon Berthelot, MD, MSc<sup>1-2-3</sup>, Marie-Eve Lamontagne, PhD<sup>3-6</sup>, Michèle Morin, MD, MSc<sup>1-3</sup>, Stéphane Lemire, MD<sup>1-3-4</sup>, Thien Tuong Minh Vu, MD<sup>11-12-13</sup>, Marcel Rheault<sup>14</sup>, Lucille Juneau<sup>15</sup>, Natalie Le Sage, PhD<sup>1-2-3</sup>, Jacques Lee, MD MSc,<sup>16-17</sup>

<sup>1</sup>Axe Santé des populations et pratiques optimales en santé, Centre de recherche du CHU de Québec-Université Laval, Québec, Canada; <sup>2</sup>Département de médecine d'urgence, CHU de Québec-Université Laval; <sup>3</sup>Université Laval, Québec, Canada; <sup>4</sup>Centre d'excellence sur le vieillissement de Québec, Québec, Canada; <sup>5</sup>Centre de recherche sur les soins et les services de première ligne de l'Université Laval; <sup>6</sup>Centre interdisciplinaire de recherche en réadaptation et intégration sociale, Québec, Canada; <sup>7</sup>Centre Intégré de Santé et de Services Sociaux de Lanaudière, Joliette, Canada; <sup>8</sup>Centre Hospitalier Régional de Trois-Rivières, Trois-Rivières, Canada; <sup>9</sup>Centre de recherche de l'Hôpital du Sacré-Cœur de Montréal, Montréal, Canada; <sup>10</sup>Université de Montréal, Montréal, Canada; <sup>11</sup>Centre de recherche du Centre hospitalier de l'Université de Montréal, Montréal, Canada; <sup>12</sup>Centre hospitalier de l'Université de Montréal; <sup>13</sup>Institut de gériatrie de l'Université de Montréal, Montréal, Canada; <sup>14</sup>CSSS de Trois-Rivières; <sup>15</sup>Centre Intégré Universitaire de Services Sociaux et de Santé de la Capitale-Nationale; <sup>16</sup>Department of Family and Community Medicine, University of Toronto, Toronto, Canada; <sup>17</sup>Sunnybrook Health Sciences center, Toronto, Canada;

**Corresponding author:** Marcel Émond MD, MSc, FRCP(C), CHU de Québec - Hôpital de l'Enfant-Jésus, 1401, 18<sup>e</sup> rue, H-608, Québec (Québec) G1J 1Z4, Canada. Phone: (418) 649-0252, ext. 66423, Fax: (418) 649-5832, Email: [marcel.emond@fmed.ulaval.ca](mailto:marcel.emond@fmed.ulaval.ca)

3261 words

**Authors' contribution:** MÉ had full access to all of the data in the study and takes responsibility for the integrity of the data and the accuracy of the data analysis. He was responsible of design, funding, conduct of the study and writing of the manuscript. VB managed the study, led the analyses and wrote the manuscript. MÉ, VB and PHC were involved in the statistical analysis, and data interpretation. MP, RD, EG and MEL were responsible for all four site recruitment. PV, SB, MM, TTMV, JL, MR, SL, NLS and LJ are all collaborator of INDEED project. PHC, MP, RD, EG, MEL, PV, SB, MM, TTMV, JL, MR, SL, NLS and LJ reviewed, and approve the manuscript.

### ABSTRACT

**Objective:** We aim to determine the incidence of delirium and describe its impacts on Emergency department (ED) and hospital length of stay (LOS) among admitted community seniors with an 8-hour exposure to the ED environment.

1  
2  
3 **Design:** This is a prospective observational multicentre cohort study (March-July 2015). Patients  
4 were assessed 2x/day during their entire ED stay and up to 24 hours on hospital ward.  
5

6 **Setting:** The study took place in 4 Canadian EDs.  
7

8 **Participants:** 338 included patients: 1) aged  $\geq 65$ ; 2) who had an ED stay  $\geq 8$  hours; 3) were  
9 admitted to hospital ward; 4) were independent/semi-independent.  
10

11 **Main Outcome(s) and Measure(s):** The primary outcomes of this study were incident delirium  
12 in the ED or within 24 h of ward admission and ED and hospital LOS. Functional and cognitive  
13 status were assessed using validated Older Americans' Resources and Services (OARS) and the  
14 Telephone Interview for Cognitive Status- modified (TICS-m) tools. The Confusion Assessment  
15 Method (CAM) was used to detect incident delirium. Univariate and multivariate analyses were  
16 conducted to evaluate outcomes.  
17  
18

19 **Results:** Mean age was 76.8 ( $\pm 8.1$ ), 17.7% were aged  $>85$  years old and 48.8% were male. The  
20 mean incidence of delirium was 12.1% (n=41). Median Interquartile range ED LOS was  
21 32.4 (24.5–47.9) hours and hospital LOS was 146.6 (75.2-267.8) hours. Adjusted mean ED LOS  
22 and mean hospital LOS were increased respectively by 5.0 hours (95% CI [-1.4, 14.1], p=0.06)  
23 and by 105.4 hours (4.4 days) (95% CI: [25.1, 162.0], p< 0.001) for patients who developed an  
24 episode of delirium compared to non-delirious patient.  
25  
26

27 **Conclusions:** An incident delirium was observed in 1 of 8 independent/semi-independent seniors  
28 after an 8-hour ED exposure. An episode of delirium increases hospital LOS by 4 days and  
29 therefore has important implications for patients and could contribute to ED overcrowding  
30 through a deleterious feedback loop.  
31  
32  
33  
34  
35  
36  
37  
38  
39  
40  
41  
42  
43  
44  
45  
46  
47  
48  
49  
50  
51  
52  
53  
54  
55  
56  
57  
58  
59  
60

### Strengths and limitations of this study

- **Largest prospective study on incident delirium in the Emergency Department.**
- **A systematic screening of delirium at study entry was realized with a validated tool.**
- **Multiple patient assessments for incident delirium were conducted.**
- **Study population was limited to independent/semi-independent elders, which may limit external validity of the findings.**
- **Hospital LOS were adjusted for potential cofounders relating to geriatric care.**

For peer review only

## INTRODUCTION

In 2016, the youngest of the "baby-boomers" turned 50 years old and people aged 65 and older represented 18.1% of the population in Quebec.(1) It is foreseen that by 2031, the proportion of seniors aged over 65 will nearly double, with a major increase among those aged 85 and older.(2) Over the coming decades, those demographic trends will fundamentally change the make-up of the population served by Quebec Emergency Departments (ED). Seniors are already the main users of emergency health care services(3-5) and in 2012-2013, 40% of ED stretchers were occupied by patients aged over 65.(6) Furthermore, patients over 75 years of age have the highest ED visit rate of any age group and in 2012-2013 those patients occupied 25% of ED stretchers.(7, 8) Those numbers will only increase over time as the elderly population grows and this "Silver Tsunami"(9) will have major consequences on the healthcare of seniors and on our health care system in general.

Caring for older patients in the ED is particularly challenging.(10) Indeed, the time-pressure environment and high level of background noise may impede efficient communications with older patients.(11, 12) Moreover, specialized geriatric training for ED health professionals remains in its infancy(13) and they may not be as equipped as they should be to face the specific issues of elderly patients. All of this may contribute to the fact that seniors have higher rates of unplanned returns to the ED,(14, 15) of hospitalization,(16) falls,(17) loss of independence(18) and unrecognized delirium(19-21) following an emergency visit. Delirium is an acute brain dysfunction defined as a mental disorder of acute onset with a fluctuating course, characterized by a disturbance in consciousness, attention, orientation, memory, thought, perception and behavior.(22, 23) It is a common problem in the ED and its prevalence in elderly patients admitted to acute and long-term care facilities ranges between 9.6% and 89%.(21, 24-26)

In August of 2013, Inouye *et al.* published a systematic review(27) in which they found no study reporting the incidence of delirium in the ED. The same author also demonstrated that an ED stay of 12 hours or more was one of the strongest independent predictors of the onset of subsequent delirium in older patients.(28-30) This is of increasing concern, as recent ED wait times have become quite significant. Since then, a few prospective studies were conducted in order to explore the problem of ED-stay associated delirium.(30-32) To our knowledge, there are few multicenter studies aimed at describing the incidence of delirium in ED of developed countries, such as Canada. Because the literature regarding the incidence of delirium in the ED and its potential impacts on hospital length of stay (LOS), functional status and unplanned ED readmissions is scant, its consequences have yet to be clearly identified in order to orient modern acute medical care. A study by McCusker *et al.* even found that hospital stay was increased by 7.78 days for patients diagnosed with delirium (either prevalent or incident) during the first 7 days of their stay.(33) The onset of such complication in the ED could influence hospital LOS and reflect back on ED crowding and seniors' use of emergency health services.

The present study focused on the incidence of delirium induced by emergency department stay. Although ED-induced delirium could be affected by acute illness, comorbidities, ED crowding metrics and health care providers' ability to provide basic care known to prevent delirium, we hypothesized that the incidence of new cases of delirium among older ED patients who are admitted to hospital affects a significant proportion of community elders, and ED-induced

1  
2  
3 delirium leads to longer hospital LOS creating a deleterious feedback loop on ED care and  
4 operations (34).  
5

6 The objective of this study was to fill a basic knowledge gap regarding the incidence of delirium  
7 and its impacts on hospital LOS for older, non-delirious ED patients with an 8-hour ED stay who  
8 are admitted to a hospital ward.  
9  
10  
11  
12  
13  
14  
15  
16  
17  
18  
19  
20  
21  
22  
23  
24  
25  
26  
27  
28  
29  
30  
31  
32  
33  
34  
35  
36  
37  
38  
39  
40  
41  
42  
43  
44  
45  
46  
47  
48  
49  
50  
51  
52  
53  
54  
55  
56  
57  
58  
59  
60

For peer review only



## METHODS

### Study setting and population

This prospective multicenter study included patients who presented to one of the 4 participating Quebec EDs (two university-affiliated level 1 trauma centers and two regional hospitals) between March and July 2015. **Inclusion criteria** were: 1) Patients aged 65 and over; 2) Patients with an ED stay of  $\geq 8$  hours; 3) Patients needing and/or waiting for admission to any hospital ward; 4) Independent or semi-independent patients (able to perform 5/7 activities of daily living according to the Older Americans Resources and Services scale (OARS)). **Exclusion criteria** were: 1) Patient with unstable medical condition requiring admission to the psychiatric ward, intensive or palliative care units; 2) Patient who are unable to consent; 3) Patients who live (or are in transition) in a long-term care facility; 4) Patients unable to speak French or English; 5) Patients presenting a delirium before coming to the ED, upon arrival or by the end of the first 8 hours in the ED; 6) Patients with a history of psychiatric disorders (such as schizophrenia, psychotic symptoms and bipolar disorder).

Our study experts suggested an 8-hour ED exposure for our patients, as opposed to the 12-hour exposure previously determined to be a predictor of subsequent delirium(28-30) because of soon to be published new recommendations from the Direction Nationale des Urgences regarding elderly patients' lengths of ED stay, which should be kept under 8 hours. Our pragmatic approach led us to include patients who need or are awaiting admission to a hospital ward; since, Caplan *et al.* showed that patients admitted to hospital have a significantly at higher proportion of delirium than their equivalent counterparts discharged and treated with home resources.(35)

Potential participants were identified using the emergency department information system. Research assistants (RAs) obtained consent and screened the participants for eligibility after their 8-hour exposure to the ED. Sociodemographic, medical and comorbidity data were collected upon initial interview. RAs also assessed patients' baseline physical, frailty and cognitive status. Patients were screened for delirium during initial interview, and twice a day (with at least 6 hours between each evaluation) during their entire ED stay and up to 24 hours after being admitted to a hospital ward. Potential participants were considered as "missed" when they was no RA on-site for the recruitment.

### Measures

Patients' frailty, physical and cognitive status were assessed using the Clinical Frailty Scale (CFS),(36) the Older Americans Resources and Services scale (OARS)(37), the Telephone Interview for Cognitive Status-modified (TICS-m)(38) and the Confusion Assessment Method (CAM) (39) and the Delirium Index (40), respectively. Other information on medications, comorbidities (Charlson comorbidity risk index) (41), severity of illness (Acute Physiological and Chronic Health Evaluation II (APACHE II) (42) and ED environment evaluation were collected in addition to sociodemographic data.

The CAM is the most commonly used tool for the detection of delirium with its sensitivity ranging between 94% and 100% and its specificity between 90% and 100%.(39, 43, 44) Because

1  
2  
3 of the fluctuating nature of delirium, patients were systematically assessed with the CAM and the  
4 Delirium Index (a validated tool used to measure the severity of delirium) (40) twice a day  
5 during their entire ED stay. Furthermore, the CAM was used over a 24-hour period following  
6 transfer to the hospital ward. ED and ward nurses and doctors were blinded to the study's  
7 objectives in order to avoid them changing their practice. The TICS-m was used to assess  
8 baseline cognitive status of our study participants.(45) ED environmental information, such as  
9 presence of proper lighting, patient's hydration, presence of physical restraints or medical  
10 interventions limiting movement, was also recorded by RAs.  
11  
12

13  
14 Each site's team of RAs received standardized training by an experienced member of the  
15 mentoring team of the *Centre d'Excellence sur le Vieillessement de Québec*(46), who also  
16 specializes in the administration of the CAM. They also attended a group training session  
17 conducted by the study coordinator and an experienced research nurse and underwent a 5-hour  
18 personalized field training. They were also provided with a detailed training manual. Inter-rater  
19 reliability was assessed during patient follow-ups at the coordinating site to ensure that the test  
20 was administered in a standardized manner.  
21  
22

### 23 **Outcomes**

24  
25 Incident delirium during the patients' ED-stay was the main outcome of this study. The CAM  
26 was administrated during the initial interview ensuring that the patient was not already delirious  
27 after the first 8 hours of their ED stay.  
28

29  
30 There are two existing interpretation methods to the CAM scores: the sensitive (SENS) and the  
31 specific (SPEC) methods.(47) A patient is diagnosed with delirium according the SPEC method  
32 if they: had an acute onset, a fluctuation in any of the items evaluated in the CAM (inattention,  
33 disorganized thinking, altered level of consciousness, disorientation, memory, sensory  
34 disturbances, psycho-motor activity, sleep disturbances) as well as inattention and either  
35 disorganized thinking or altered state of consciousness.(25) A patient has delirium according to  
36 the SENS method if they: had either an acute onset or a fluctuation in any of the items evaluated  
37 in the CAM, inattention and either disorganized thinking or altered state of consciousness.(25)  
38 Patients whose symptoms corresponded to either of those definitions were considered as  
39 "delirious" in this study.  
40  
41

42  
43 ED LOS was measured from the date and time of triage up to the date and time when the patients  
44 were physically transferred to the hospital ward. Hospital LOS was also measured from ED  
45 triage up to the date and time of hospital discharge. ED and hospital LOS were compared  
46 between patients with a positive CAM and those with a negative CAM for each site.  
47

### 48 **Statistical analyses**

49  
50 Descriptive statistics were computed on patient characteristics and measured outcomes.  
51 Cumulative incidence rates are estimated using Kaplan-Meier curves. ED and hospital LOS is  
52 compared in patients with and without incident delirium in the various sites using multiple linear  
53 regression, adjusting for APACHE, Charlson and age. Site and its interaction with incident  
54 delirium is treated as a fixed factor. TICS-m scores were adjusted for patients' level of  
55  
56  
57  
58  
59  
60

1  
2  
3 education. Kappa statistics were computed to measure inter-rater reliability of the CAM. Based  
4 on an alpha of 5%, 138 patients would allow 80% power for an estimated overall incidence  
5 proportion of 15 % with 5% precision. Analyses were performed using SAS, version 9.4 (SAS  
6 Institute, Inc., Cary, NC).  
7

8  
9 The Comité d'éthique du CHU de Québec acted as the centralized research ethics board and  
10 approved this study (project # MP-20-2015-2130). Written consent was obtained for each study  
11 participant. Patient records/information were anonymized prior to analysis.  
12  
13  
14  
15  
16  
17  
18  
19  
20  
21  
22  
23  
24  
25  
26  
27  
28  
29  
30  
31  
32  
33  
34  
35  
36  
37  
38  
39  
40  
41  
42  
43  
44  
45  
46  
47  
48  
49  
50  
51  
52  
53  
54  
55  
56  
57  
58  
59  
60

For peer review only

## RESULTS

### Population

A total of 2699 patients were screened by research assistants across our 4 sites (figure 1). Of those, 1780 did not meet our inclusion criteria or had one of our exclusion criteria, 417 were missed and 164 refused to participate to the study. This leaves us with a sample of 338 patients (12.5%). Females represented 51.2% of our population and mean age was 76.8 ( $\pm 8.09$ ) (table 1).

A sample analysis of patients who were missed revealed that they had a similar profile to that of those who were included in our study. 54.9% were female, with a mean age of 77.4 ( $\pm 9.4$ ) years old. The mean Charlson Comorbidity Score was 1.7 ( $\pm 1.7$ ), 36.7% were considered level 1 or 2 on the Canadian Triage Assessment Scale (CTAS) and 38% were level 3. The medical notes revealed only one case of incident delirium within 24 hours of triage for this group of patients. Table 1 provides details on sociodemographic and environmental variables.

### Incidence of delirium

In our cohort, we found that the overall incidence of delirium was 12.1% (n=41) using the SENS method, overall incidence and its distribution across sites are provided in figure 2. Our results indicate that the delirium incidence rate was 2.9 cases per 1000 patient-hours. Figure 3 shows a cumulative incidence of delirium curve. Median ED LOS before developing a delirium was 45.2 h (38.0-52.5).

### Inter-rater agreement on main outcome

Inter-rater agreements were performed at the coordinating site on 12% of the site's participants. A perfect agreement was obtained regarding the incidence of delirium, and agreement for each of the CAM items had Kappa ranging between 0.63 and 1.0.

### ED and hospital length of stay

Median (IQR) ED LOS was 32.4 (24.5–47.9) hours. When adjusting for site, age, Charlson, APACHE, OARS and TICS-m scores, a difference of 5.0 hours was found in the average adjusted ED LOS between individuals who developed a delirium and those who did not ( $p=0.21$ ) (see Figure 4). Of note, a statistically significant difference was found for site 2 ( $p=0.03$ ). Therefore, patients who developed incident delirium generally had slightly longer exposure to the ED environment than patients who did not develop the condition.

Median (IQR) hospital LOS was 146.6 (75.2-267.8) hours. Mean hospital LOS for patients with incident delirium was increased by 136.4 hours (5.7 days), 66.4 hours (2.8 days), 155.4 hours (6.5 days) and 63.5 hours (2.6 days) for sites 1, 2, 3 and 4, respectively (see Figure 5). On average, adjusted hospital LOS was 209 hours (8.7 days) for non-delirious participants while patients who were found to have incident delirium had a 314.4-hour (13.1 days) hospital stay. Mean hospital adjusted LOS was significantly increased by 105.4 hours (4.4 days) in the delirious patients compared to non-delirious patient ( $p=0.003$ ).

## INTERPRETATION

Our study is, to our knowledge, the first large Canadian prospective study aiming to determine the incidence of delirium induced by ED stay in elderly patients and then to analyze its impacts on the length of in-hospital stay. We found a 12.1% incidence for delirium in our cohort of 338 elderly patients. Our study determined that there was a statistically significant association between incident delirium and hospital LOS, which was increased by 4.4 days in patients with incident delirium. A statistically non-significant increase of 5.0 hours was also found in the average ED LOS between those 2 groups, but this increase is of clinical importance for patient care.

Our results confirm the clinical importance of incident delirium in acute medicine care. A previous Canadian retrospective study was conducted by our team(48) using a chart-based CAM,(49) in which an 18% incidence of delirium was found in 200 patients medical charts. Half of those patients developed a delirium within 36 hours of arrival to the ED. A prospective cohort study by Bo *et al.* also discovered that ED LOS >10 hours is strongly associated with delirium onset.(30) They included patients over 75 years of age. Delirium was detected using the 4AT tool (sensitivity of 89.7% and specificity of 84.1% compared to that of the CAM) (50), which was administered soon after the patient's ED arrival (3.3 ±1 hours). Patients were then assessed 4 times a day during 72 hours of their admission to the acute medical or geriatric ward. 15.8% of their cohort was diagnosed with delirium 3 days after their ward admission. Their participants were older (mean age 83.2±5.4) and less independent (only 50% were independent in their ADLs and one third had at least moderate cognitive impairment). Our patients were exclusively independent and semi-independent living in the community, who presented to the ED with various medical complaints leading to their admission to any hospital ward (including surgical wards).

Han *et al.* showed a 17.2% delirium incidence in their ED cohort study of 628 patients.(31) However, the number of delirious patients may have been underestimated since those who were in the ED for over 12 hours were excluded from this study. The CAM for the Intensive Care Unit (CAM-ICU) tool was used in order to detect delirium. Even with its high sensitivity and specificity (93-100% and 89-100% respectively),(51, 52) the CAM is a more comprehensive tool for the detection of delirium and is better suited to the ED environment.

Delaney *et al.* found that implementing an alert into the EMR system for triage nurses to screen every patient over 65 years old for delirium helped decreasing the number of unrecognized prevalent delirium cases being discharged home.(32) In fact, they found that ED nurses identified 23% of patients as potentially positive for delirium, in an unknown number of patients seen. They used a combination of the Richmond Assessment Sedation Scale (RASSS)(23) and the brief-Confusion Assessment Method (bCAM) in order to identify patients with delirium.(53) To our knowledge, no other study has evaluated the combination of those two tools in the detection of delirium and furthermore, no descriptive data on the population other than age is available.

In 2011, the Ministère de la Santé et des Services Sociaux has published its provincial guide "Approche adaptée à la personne âgée en milieu hospitalier", (54) a senior-friendly initiative which aimed to better address the in-hospital care of elders. This initiative stresses the importance of keeping lengths of stay as short as possible for seniors and presents various methods to prevent delirium. Every hospital in the province has implemented these guidelines at

1  
2  
3 different levels. However, our results show that over 4 years post-implementation, ED lengths of  
4 stay for elderly patients are still quite significant in Quebec, increasing their risk of developing  
5 delirium according to previous studies. Our results also clearly confirm the fact that patients with  
6 incident delirium have longer hospital length of stay, making them more at risk for further  
7 complications. We also recorded an important difference in incident delirium across the 4 study  
8 sites, varying from 8.3% to 20%. Although inter-site comparisons were not powered by our  
9 sample size, many factors could have explained this difference. The different level of  
10 implementation of the provincial senior-friendly guidelines at each site could be a possible cause.  
11

12  
13 Our study has some limitations. Our high rate of missed patients is mainly due to logistic  
14 constraints. However, after comparing the socio-demographic characteristics and comorbidities,  
15 we have found no significant difference between patients who were included and those who were  
16 missed. Furthermore, including those missed patients would likely have reinforced our results,  
17 resulting in higher delirium rates and longer ED and hospital LOS. Therefore, we believe the  
18 likelihood of selection bias is low.  
19

20  
21 Our cohort represents only a portion of the elderly population usually seen in the ED. We have  
22 chosen to exclude patients with moderate to severe dementia, those who lived in long-term  
23 nursing homes, those with pre-existing psychological conditions and patients who had a lesser  
24 functional level. We have made this decision because we were mainly interested to investigate  
25 the impact of delirium on the most robust elderly patients.  
26

27  
28 The CAM was administered by different research assistants, and therefore this might have  
29 underestimated or overestimated the frequency of an acute onset of a new symptom. This may  
30 have introduced an interviewer bias; however, this situation is not any different from real-life  
31 clinical practice. We tried to decrease this potential bias by providing research assistants with  
32 standardized training, which was proven effective given our good inter-observer agreement. The  
33 study coordinator also reviewed every single research file to ensure completeness.  
34  
35

36 This study aimed at assessing the present situation in our Canadian EDs regarding the incidence  
37 of delirium induced by a prolonged ED-stay in independent and semi-independent elderly  
38 patients. The high incidence rate and increased hospital LOS are alarming and could have  
39 substantial consequences for the patient and for our health care system in general. Delirium itself  
40 is an economic burden in the United States as it is estimated to 152\$ billion per year.(31)  
41  
42

43 An interesting solution to this issue might be the use of a short triage tool aiming to identify  
44 patients more at risk of developing a delirium during their ED stay. Delaney *et al.* found that  
45 implementing an alert into the EMR system for triage nurses to screen every patient over 65  
46 years old for delirium helped ED nurses better identify 23% of patients as potentially positive for  
47 delirium.(32) However, more research is needed in order to identify an appropriate tool to be  
48 used by triage nurses.  
49  
50

51  
52  
53 **Grant:** This study was funded by the Fond Québécois de Recherche en Santé (FQRS 29307).  
54

55 **Conflicts of interest:** None  
56  
57

1  
2  
3 **Acknowledgements:** We would like to thank all the research assistants who participated in the  
4 recruitment of patients.  
5

6  
7 **Data sharing statement:** Being a prospective observational multicentre study, this project  
8 includes other data results to be solely used by our research team. The data use is guide by a  
9 public funding agency - FQRS  
10  
11  
12  
13  
14  
15  
16  
17  
18  
19  
20  
21  
22  
23  
24  
25  
26  
27  
28  
29  
30  
31  
32  
33  
34  
35  
36  
37  
38  
39  
40  
41  
42  
43  
44  
45  
46  
47  
48  
49  
50  
51  
52  
53  
54  
55  
56  
57  
58  
59  
60

For peer review only

## REFERENCES

1. Gouvernement du Québec - Institut de la statistique du Québec. Le bilan démographique du Québec. 2016.
2. Heffler S, Levitt K, Smith S, Smith C, Cowan C, Lazenby H, et al. Health spending growth up in 1999; Faster growth expected in the future. *Health affairs*. 1999;20(2):193-203.
3. Data warehouse on trends in health and aging 2002. Available from: [www.cdc.gov/nchs/about/otheract/aging/trenddata.htm](http://www.cdc.gov/nchs/about/otheract/aging/trenddata.htm).
4. Mathews M, Barnsley J. Patients seeking care during acute illness. Why do they not see their regular physicians? *Can Fam Physician*. 2003;49:1498-503. PubMed PMID: 14649989.
5. Hahn B, Lefkowitz D. Annual expenses and sources of payment for health care services. Rockville, MD: Agency For Health Care Policy and Research, Public Health Service, 1992 14 DHHS Pub. No AHCPR 93-0007.
6. Le Commissaire à la santé et au bien-être (CSBE). Les Urgences au Québec : Évolution de 2003-2004 à 2012-2013. 2014.
7. Burt CW, McCaig LF. Trends in hospital emergency department utilization: United States, 1992-99. *Vital Health Stat* 13. 2001(150):1-34. PubMed PMID: 11577602.
8. McCaig LF, Burt CW. National Hospital Ambulatory Medical Care Survey: 2002 emergency department summary. *Adv Data*. 2004(340):1-34. PubMed PMID: 15068333.
9. Delafuente JC. The silver tsunami is coming: will pharmacy be swept away with the tide? *American journal of pharmaceutical education*. 2009;73(1):1. PubMed PMID: 19513138; PubMed Central PMCID: PMC2690864.
10. Hwang U, Morrison RS. The geriatric emergency department. *J Am Geriatr Soc*. 2007;55(11):1873-6. Epub 2007/10/06. doi: 10.1111/j.1532-5415.2007.01400.x. PubMed PMID: 17916122.
11. Baraff LJ, Bernstein E, Bradley K, Franken C, Gerson LW, Hannegan SR, et al. Perceptions of emergency care by the elderly: results of multicenter focus group interviews. *Ann Emerg Med*. 1992;21(7):814-8. PubMed PMID: 1610038.
12. Moons P, Arnauts H, Delooz HH. Nursing issues in care for the elderly in the emergency department: an overview of the literature. *Accid Emerg Nurs*. 2003;11(2):112-20. PubMed PMID: 12633630.
13. Hedges JR, Singal BM, Rousseau EW, Sanders AB, Bernstein E, McNamara RM, et al. Geriatric patient emergency visits. Part II: Perceptions of visits by geriatric and younger patients. *Ann Emerg Med*. 1992;21(7):808-13. Epub 1992/07/01. doi: S0196-0644(05)81026-1 [pii]. PubMed PMID: 1610037.
14. Boulton C, Dowd B, McCaffrey D, Boulton L, Hernandez R, Krulwich H. Screening elders for risk of hospital admission. *Journal of the American Geriatrics Society*. 1993;41(8):811-7. PubMed PMID: 8340558.
15. Friedmann PD, Jin L, Karrison TG, Hayley DC, Mulliken R, Walter J, et al. Early revisit, hospitalization, or death among older persons discharged from the ED. *Am J Emerg Med*. 2001;19(2):125-9. PubMed PMID: 11239256.
16. Marcantonio ER, McKean S, Goldfinger M, Kleefield S, Yurkofsky M, Brennan TA. Factors associated with unplanned hospital readmission among patients 65 years of age and older in a Medicare managed care plan. *Am J Med*. 1999;107(1):13-7. PubMed PMID: 10403347.
17. Speechley M, Tinetti M. Falls and injuries in frail and vigorous community elderly persons. *Journal of the American Geriatrics Society*. 1991;39(1):46-52. PubMed PMID: 1987256.
18. Aminzadeh F, Dalziel WB. Older adults in the emergency department: a systematic review of patterns of use, adverse outcomes, and effectiveness of interventions. *Ann Emerg Med*. 2002;39(3):238-47. PubMed PMID: 11867975.



19. Hustey FM, Meldon SW. The prevalence and documentation of impaired mental status in elderly emergency department patients. *Ann Emerg Med.* 2002;39(3):248-53. PubMed PMID: 11867976.
20. Han JH, Zimmerman EE, Cutler N, Schnelle J, Morandi A, Dittus RS, et al. Delirium in older emergency department patients: recognition, risk factors, and psychomotor subtypes. *Acad Emerg Med.* 2009;16(3):193-200. Epub 2009/01/22. doi: 10.1111/j.1553-2712.2008.00339.x. PubMed PMID: 19154565; PubMed Central PMCID: PMCPMC5015887.
21. Elie M, Rousseau F, Cole M, Primeau F, McCusker J, Bellavance F. Prevalence and detection of delirium in elderly emergency department patients. *CMAJ : Canadian Medical Association journal = journal de l'Association medicale canadienne.* 2000;163(8):977-81. Epub 2000/11/09. PubMed PMID: 11068569; PubMed Central PMCID: PMC80546.
22. Cole MG. Delirium in elderly patients. *The American journal of geriatric psychiatry : official journal of the American Association for Geriatric Psychiatry.* 2004;12(1):7-21. PubMed PMID: 14729554.
23. Han JH, Wilber ST. Altered mental status in older patients in the emergency department. *Clinics in geriatric medicine.* 2013;29(1):101-36. Epub 2012/11/28. doi: 10.1016/j.cger.2012.09.005. PubMed PMID: 23177603; PubMed Central PMCID: PMCPMC3614410.
24. Fick DM, Agostini JV, Inouye SK. Delirium superimposed on dementia: a systematic review. *J Am Geriatr Soc.* 2002;50(10):1723-32. PubMed PMID: 12366629.
25. Lemienre J, Nelis T, Joosten E, Braes T, Foreman M, Gastmans C, et al. Detection of delirium by bedside nurses using the confusion assessment method. *J Am Geriatr Soc.* 2006;54(4):685-9. Epub 2006/05/12. doi: 10.1111/j.1532-5415.2006.00667.x. PubMed PMID: 16686883.
26. Voyer P, Richard S, Doucet L, Carmichael PH. Detecting delirium and subsyndromal delirium using different diagnostic criteria among demented long-term care residents. *Journal of the American Medical Directors Association.* 2009;10(3):181-8. PubMed PMID: 19233058.
27. Inouye SK, Westendorp RG, Saczynski JS. Delirium in elderly people. *Lancet.* 2014;383(9920):911-22. Epub 2013/09/03. doi: S0140-6736(13)60688-1 [pii] 10.1016/S0140-6736(13)60688-1. PubMed PMID: 23992774.
28. Inouye SK, Viscoli CM, Horwitz RI, Hurst LD, Tinetti ME. A predictive model for delirium in hospitalized elderly medical patients based on admission characteristics. *Ann Intern Med.* 1993;119(6):474-81. PubMed PMID: 8357112.
29. Inouye SK, Charpentier PA. Precipitating factors for delirium in hospitalized elderly persons. Predictive model and interrelationship with baseline vulnerability. *Jama.* 1996;275(11):852-7. PubMed PMID: 8596223.
30. Bo M, Bonetto M, Bottignole G, Porrino P, Coppo E, Tibaldi M, et al. Length of Stay in the Emergency Department and Occurrence of Delirium in Older Medical Patients. *J Am Geriatr Soc.* 2016;64(5):1114-9. Epub 2016/05/11. doi: 10.1111/jgs.14103. PubMed PMID: 27160482.
31. Han JH, Eden S, Shintani A, Morandi A, Schnelle J, Dittus RS, et al. Delirium in older emergency department patients is an independent predictor of hospital length of stay. *Acad Emerg Med.* 2011;18(5):451-7. Epub 2011/04/28. doi: 10.1111/j.1553-2712.2011.01065.x. PubMed PMID: 21521405; PubMed Central PMCID: PMCPMC3768130.
32. Delaney M, Pepin J, Somes J. Emergency Department Delirium Screening Improves Care and Reduces Revisits for the Older Adult Patient. *J Emerg Nurs.* 2015;41(6):521-4. Epub 2015/09/28. doi: 10.1016/j.jen.2015.08.013. PubMed PMID: 26409656.
33. McCusker J, Cole MG, Dendukuri N, Belzile E. Does delirium increase hospital stay? *J Am Geriatr Soc.* 2003;51(11):1539-46. Epub 2003/12/23. PubMed PMID: 14687382.
34. Forster AJ, Stiell I, Wells G, Lee AJ, van Wieringen C. The effect of hospital occupancy on emergency department length of stay and patient disposition. *Academic Emergency Medicine.* 2003;10:127-33.

- 1  
2  
3 35. Caplan GA, Coconis J, Woods J. Effect of hospital in the home treatment on physical and  
4 cognitive function: a randomized controlled trial. *J Gerontol A Biol Sci Med Sci*. 2005;60(8):1035-8. Epub  
5 2005/08/30. doi: 60/8/1035 [pii]. PubMed PMID: 16127109.
- 6 36. Rockwood K, Song X, MacKnight C, Bergman H, Hogan DB, McDowell I, et al. A global clinical  
7 measure of fitness and frailty in elderly people. *CMAJ : Canadian Medical Association journal = journal*  
8 *de l'Association medicale canadienne*. 2005;173(5):489-95. Epub 2005/09/01. doi: 173/5/489 [pii]  
9 10.1503/cmaj.050051. PubMed PMID: 16129869; PubMed Central PMCID: PMC1188185.
- 11 37. Fillenbaum GG, Duke U. Multidimensional functional assessment of older adults: the Duke Older  
12 Americans Resources and Services procedures. Hillsdale, NJ: L. Erlbaum Associates; 1988. xii, 179 p. p.
- 13 38. de Jager C, Budge M, Clarke R. Utility of TICS-M for the assessment of cognitive function in older  
14 adults. *International journal of geriatric psychiatry*. 2003;18(4):318-24.
- 15 39. Inouye SK, van Dyck CH, Alessi CA, Balkin S, Siegal AP, Horwitz RI. Clarifying confusion: the  
16 confusion assessment method. A new method for detection of delirium. *Ann Intern Med*.  
17 1990;113(12):941-8. Epub 1990/12/15. PubMed PMID: 2240918.
- 18 40. McCusker J, Cole MG, Dendukuri N, Belzile E. The delirium index, a measure of the severity of  
19 delirium: new findings on reliability, validity, and responsiveness. *J Am Geriatr Soc*. 2004;52(10):1744-9.  
20 Epub 2004/09/29. doi: 10.1111/j.1532-5415.2004.52471.x. PubMed PMID: 15450055.
- 21 41. Frenkel WJ, Jongerius EJ, Mandies-van Uiter MJ, van Munster BC, De Rooij SE. Validation of the  
22 Charlson comorbidity index in acutely hospitalized elderly adults: a prospective cohort study. *Journal of*  
23 *the American Geriatrics Society*. 2014;62(2):342-246. doi: 10.1111/jgs.12635.
- 24 42. Knaus WA, Draper EA, Wagner DP, Zimmerman JE. APACHE II: a severity of disease classification  
25 system. *Critical Care Medicine*. 1985;13(10):818-29.
- 26 43. Monette J, Galbaud du Fort G, Fung SH, Massoud F, Moride Y, Arsenault L, et al. Evaluation of  
27 the Confusion Assessment Method (CAM) as a screening tool for delirium in the emergency room.  
28 *General hospital psychiatry*. 2001;23(1):20-5. PubMed PMID: 11226553.
- 29 44. Wei LA, Fearing MA, Sternberg EJ, Inouye SK. The Confusion Assessment Method: a systematic  
30 review of current usage. *J Am Geriatr Soc*. 2008;56(5):823-30. PubMed PMID: 18384586.
- 31 45. Herr M, Ankri J. A critical review of the use of telephone tests to identify cognitive impairment in  
32 epidemiology and clinical research. *Journal of telemedicine and telecare*. 2013;19(1):45-54. Epub  
33 2013/02/08. doi: 10.1177/1357633x12474962. PubMed PMID: 23390209.
- 34 46. Centre intégré universitaire de santé et de services sociaux de la Capitale-Nationale. Centre  
35 d'excellence sur le vieillissement de Québec [May 1 2017]. Available from: [https://www.ciuss-  
38 capitale-nationale.gouv.qc.ca/expertise-et-partenariat/le-centre-dexcellence-sur-le-vieillessement-de-  
39 quebec](https://www.ciuss-<br/>36 capitale-nationale.gouv.qc.ca/expertise-et-partenariat/le-centre-dexcellence-sur-le-vieillessement-de-<br/>37 quebec).
- 40 47. Inouye S. CAM Training Manual. New Haven, CT: Yale University School of Medicine; 1991.
- 41 48. Émond M, Grenier D, Morin J, Eagles D, Boucher V, Le Sage N, et al. Emergency Department stay  
42 associated delirium in older patients. *Canadian Geriatrics Journal*. 2017;20(1).
- 43 49. Inouye SK, Leo-Summers L, Zhang Y, Bogardus ST, Jr., Leslie DL, Agostini JV. A chart-based  
44 method for identification of delirium: validation compared with interviewer ratings using the confusion  
45 assessment method. *J Am Geriatr Soc*. 2005;53(2):312-8. PubMed PMID: 15673358.
- 46 50. Bellelli G, Morandi A, Davis DH, Mazzola P, Turco R, Gentile S, et al. Validation of the 4AT, a new  
47 instrument for rapid delirium screening: a study in 234 hospitalised older people. *Age and ageing*.  
48 2014;43(4):496-502. Epub 2014/03/05. doi: 10.1093/ageing/afu021. PubMed PMID: 24590568; PubMed  
49 Central PMCID: PMC4066613.
- 50 51. Ely EW, Inouye SK, Bernard GR, Gordon S, Francis J, May L, et al. Delirium in mechanically  
51 ventilated patients: validity and reliability of the confusion assessment method for the intensive care  
52 unit (CAM-ICU). *Jama*. 2001;286(21):2703-10. Epub 2001/12/26. PubMed PMID: 11730446.
- 53  
54  
55  
56  
57  
58  
59  
60

- 1  
2  
3 52. Ely EW, Margolin R, Francis J, May L, Truman B, Dittus R, et al. Evaluation of delirium in critically  
4 ill patients: validation of the Confusion Assessment Method for the Intensive Care Unit (CAM-ICU). Crit  
5 Care Med. 2001;29(7):1370-9. Epub 2001/07/11. PubMed PMID: 11445689.  
6  
7 53. Han JH, Wilson A, Vasilevskis EE, Shintani A, Schnelle JF, Dittus RS, et al. Diagnosing delirium in  
8 older emergency department patients: validity and reliability of the delirium triage screen and the brief  
9 confusion assessment method. Ann Emerg Med. 2013;62(5):457-65. Epub 2013/08/07. doi:  
10 10.1016/j.annemergmed.2013.05.003. PubMed PMID: 23916018; PubMed Central PMCID:  
11 PMC3936572.  
12 54. Ministère de la Santé et des Services Sociaux. Approche adaptée à la personne âgée en milieu  
13 hospitalier - Cadre de référence. 2011.  
14  
15  
16  
17  
18  
19  
20  
21  
22  
23  
24  
25  
26  
27  
28  
29  
30  
31  
32  
33  
34  
35  
36  
37  
38  
39  
40  
41  
42  
43  
44  
45  
46  
47  
48  
49  
50  
51  
52  
53  
54  
55  
56  
57  
58  
59  
60

For peer review only

## TABLES

Table 1. Description of the study population

|                                                | Site 1<br>n(%) | Site 2<br>n(%) | Site 3<br>n(%) | Site 4<br>n(%) | Site comparison<br>p-value | Total       |
|------------------------------------------------|----------------|----------------|----------------|----------------|----------------------------|-------------|
| <b>Age</b>                                     |                |                |                |                |                            |             |
| 65-74 y/o                                      | 61 (57)        | 21 (32)        | 38 (45)        | 35 (42)        | 0.001                      | 155 (46)    |
| 75-84 y/o                                      | 36 (34)        | 23 (35)        | 35 (42)        | 29 (35)        |                            | 123 (36)    |
| ≥85 y/o                                        | 9 (9)          | 21 (32)        | 11 (13)        | 19 (23)        |                            | 60 (18)     |
| <b>Sex</b>                                     |                |                |                |                |                            |             |
| Female                                         | 53 (50)        | 37 (57)        | 39 (46)        | 44 (53)        | 0.618                      | 173 (51)    |
| <b>Home alone</b>                              |                |                |                |                |                            |             |
| <b>CTAS</b>                                    |                |                |                |                |                            |             |
| 1 & 2                                          | 39 (37)        | 25 (38)        | 25 (30)        | 18 (22)        | 0.076                      | 107 (31,7)  |
| 3                                              | 47 (44)        | 28 (43)        | 43 (51)        | 37 (45)        |                            | 155 (45,9)  |
| 4 & 5                                          | 20 (19)        | 12 (18)        | 16 (19)        | 28 (34)        |                            | 76 (22,5)   |
| OARS at baseline (mean ± SD)                   | 26.33 ±1.98    | 26.41 ±2.20    | 25.95 ±2.60    | 24.92 ±2.41    | <0.001                     | 25.91 ±2.36 |
| TICS-m at baseline (mean ± SD)*                | 30.36 ±5.68    | 31.88 ±4.69    | 29.37 ±5.92    | 26.81 ±6.70    | <0.001                     | 29.53 ±6.08 |
| Charlson (mean ± SD)                           | 1.93 ±1.78     | 1.65 ±1.69     | 3.13 ±2.48     | 1.81 ±1.55     | <0.001                     | 2.14 ±1.99  |
| APACHE II (mean ± SD)                          | 10.99 ±3.43    | 10.77 ±3.37    | 9.48 ±3.43     | 8.70 ±3.17     | <0.001                     | 10.01 ±3.48 |
| <b>Environmental factors</b>                   |                |                |                |                |                            |             |
| Proper lighting <sup>a</sup>                   | 65 (63)        | 49 (75)        | 71 (85)        | 18 (22)        | <0.001                     | 203 (61)    |
| <b>Patient hydration</b>                       |                |                |                |                |                            |             |
| Fasting                                        | 10 (10)        | 8 (12)         | 11 (13)        | 16 (19)        | 0.369                      | 45 (14)     |
| Glass of water within reach                    | 70 (72)        | 55 (85)        | 52 (65)        | 71 (86)        | 0.005                      | 248 (76)    |
| Presence of saliva <sup>‡</sup>                | 74 (76)        | 52 (80)        | 49 (60)        | 9 (11)         | <0.001                     | 184 (56)    |
| Any IV Fluids                                  | 75 (77)        | 58 (89)        | 78 (95)        | 65 (78)        | 0.003                      | 276 (84)    |
| Physical restraints (any) <sup>†</sup>         | 78 (77)        | 30 (46)        | 1 (1)          | 65 (79)        | <0.001                     | 174 (53)    |
| <b>Medical interventions limiting movement</b> |                |                |                |                |                            |             |
| Bed rest                                       | 1 (1)          | 1 (2)          | 5 (6)          | 0 (0,0)        | 0.071                      | 7 (2)       |
| Urinary catheter                               | 7 (8)          | 5 (9)          | 2 (2)          | 2 (3)          | 0.217                      | 16 (6)      |
| O2                                             | 15 (17)        | 15 (26)        | 22 (27)        | 4 (6)          | 0.007                      | 56 (19)     |
| Saline-lock Catheter or IV drip                | 72 (84)        | 53 (91)        | 75 (92)        | 57 (88)        | 0.377                      | 257 (88)    |
| Other                                          | 10 (12)        | 8 (14)         | 18 (22)        | 6 (9)          | 0.125                      | 42 (14)     |
| Temporal orientation aid <sup>•</sup>          | 67 (63)        | 45 (69)        | 53 (63)        | 37 (45)        | 0.010                      | 202 (60)    |

\* Adjusted for level of education

<sup>a</sup> According to the research assistant<sup>‡</sup> Research assistant verified if the patients had saliva under their tongue<sup>†</sup> Tablet, bed rails or other<sup>•</sup> Clock, watch, cell phone, calendar

1  
2  
3  
4  
5  
6  
7  
8  
9  
10  
11  
12  
13  
14  
15  
16  
17  
18  
19  
20  
21  
22  
23  
24  
25  
26  
27  
28  
29  
30  
31  
32  
33  
34  
35  
36  
37  
38  
39  
40  
41  
42  
43  
44  
45  
46  
47  
48  
49  
50  
51  
52  
53  
54  
55  
56  
57  
58  
59  
60

CTAS: Canadian Triage Assessment Scale; OARS: Older American’s Resources and Services; TICS-m: Telephone Interview for Cognitive Status-modified; APACHE II: Acute Physiological and Chronic Health Evaluation II; IV: intravenous injection;

For peer review only

**FIGURES LEGEND****Figure 1. Study flowchart****Figure 2. Distribution of delirium across participating sites****Figure 3. Cumulative incidence of delirium curve****Figure 4. Adjusted length of ED stay (hours)\***

\* Length of stay was adjusted for site, age, Charlson, APACHE, OARS and TICS-m scores. \*\*: Difference between No delirium and Incident delirium in terms of length of ED stay <0.05

**Figure 5. Adjusted length of hospital stay (hours)\***

\* Length of stay was adjusted for site, age, Charlson, APACHE, OARS and TICS-m scores. \*\*: Difference between No delirium and Incident delirium in terms of length of ED stay <0.05

1  
2  
3  
4  
5  
6  
7  
8  
9  
10  
11  
12  
13  
14  
15  
16  
17  
18  
19  
20  
21  
22  
23  
24  
25  
26  
27  
28  
29  
30  
31  
32  
33  
34  
35  
36  
37  
38  
39  
40  
41  
42  
43  
44  
45  
46  
47  
48  
49  
50  
51  
52  
53  
54  
55  
56  
57  
58  
59  
60

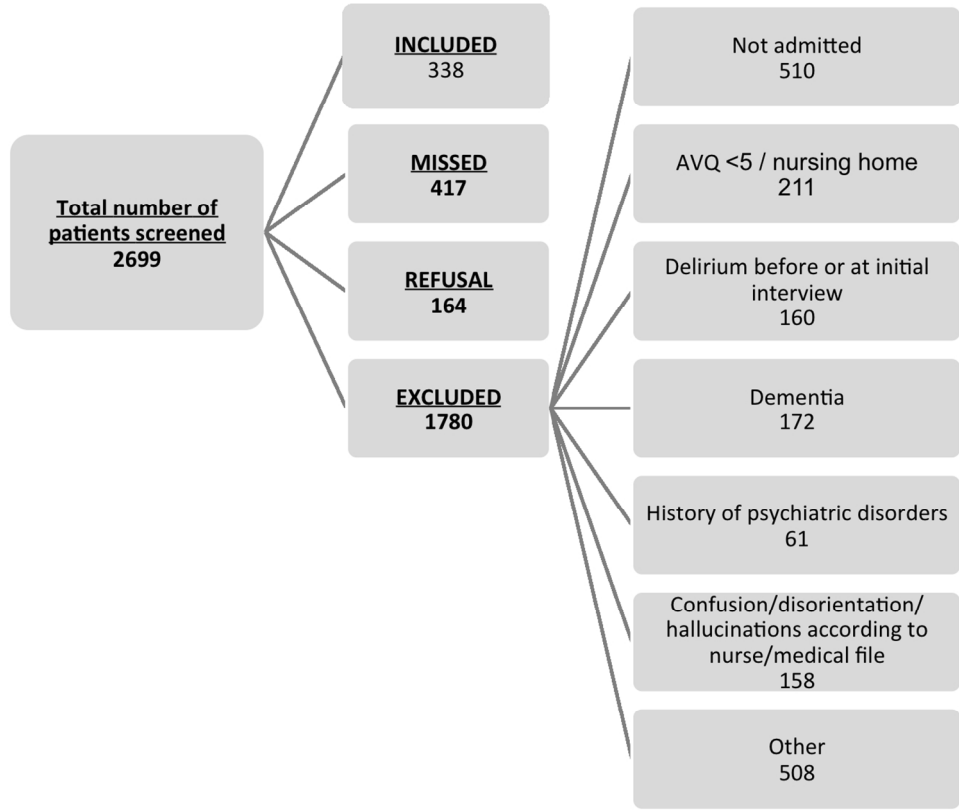

Peer review only

1  
2  
3  
4  
5  
6  
7  
8  
9  
10  
11  
12  
13  
14  
15  
16  
17  
18  
19  
20  
21  
22  
23  
24  
25  
26  
27  
28  
29  
30  
31  
32  
33  
34  
35  
36  
37  
38  
39  
40  
41  
42  
43  
44  
45  
46  
47  
48  
49  
50  
51  
52  
53  
54  
55  
56  
57  
58  
59  
60

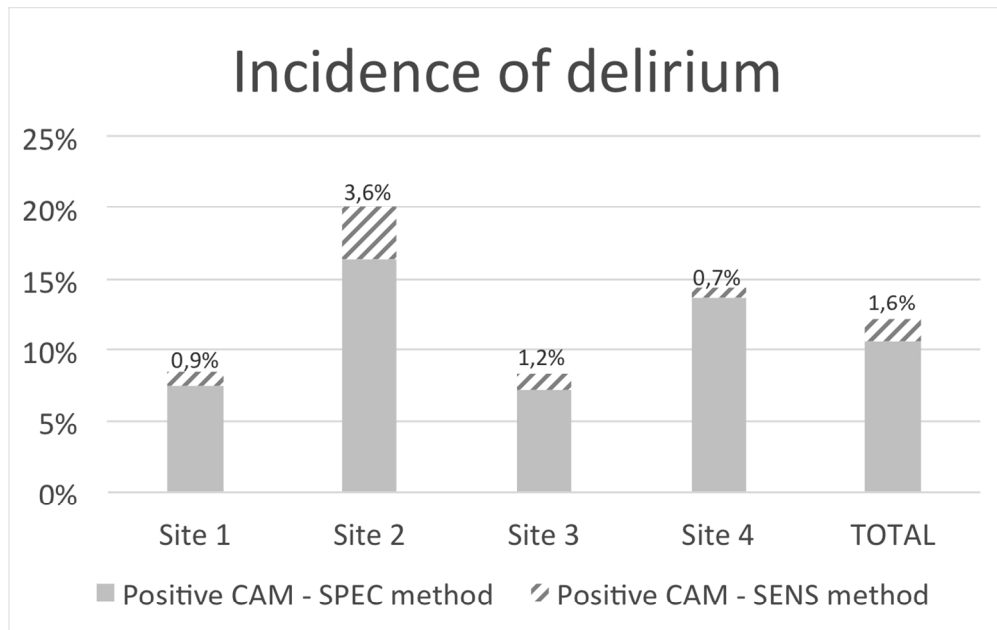

view only



1  
2  
3  
4  
5  
6  
7  
8  
9  
10  
11  
12  
13  
14  
15  
16  
17  
18  
19  
20  
21  
22  
23  
24  
25  
26  
27  
28  
29  
30  
31  
32  
33  
34  
35  
36  
37  
38  
39  
40  
41  
42  
43  
44  
45  
46  
47  
48  
49  
50  
51  
52  
53  
54  
55  
56  
57  
58  
59  
60

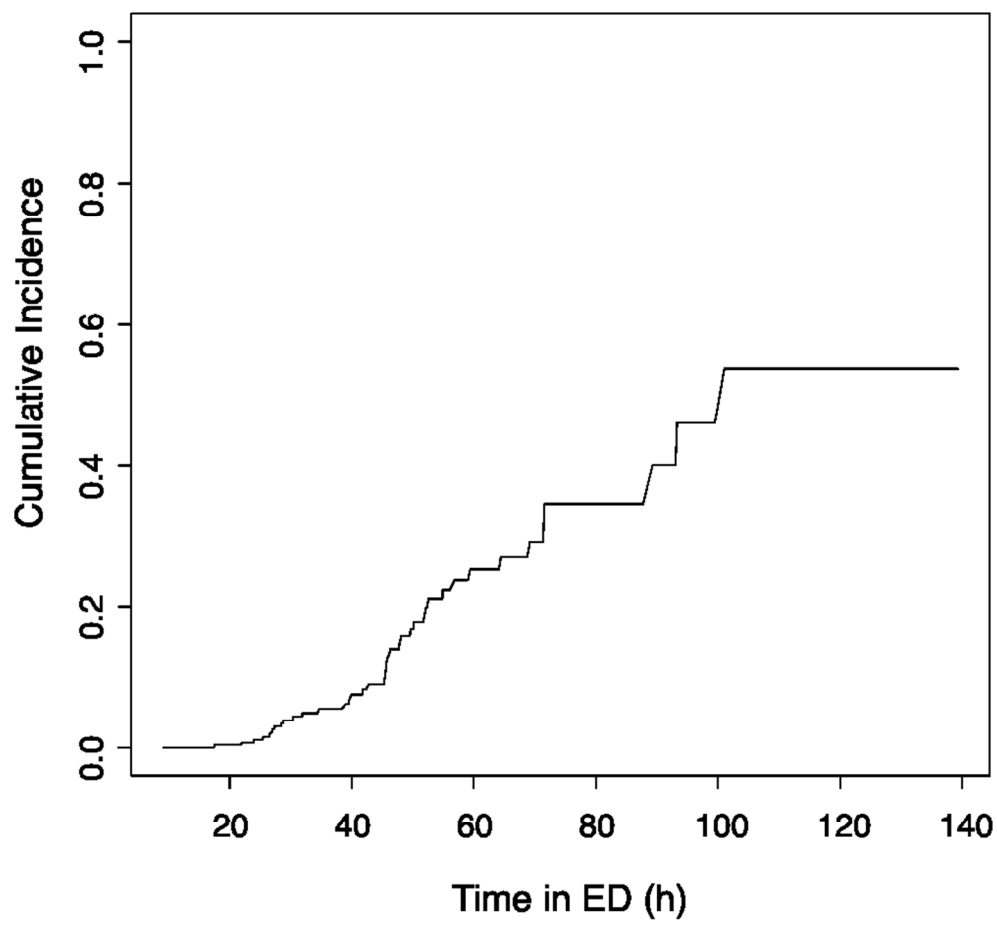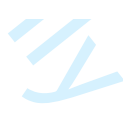

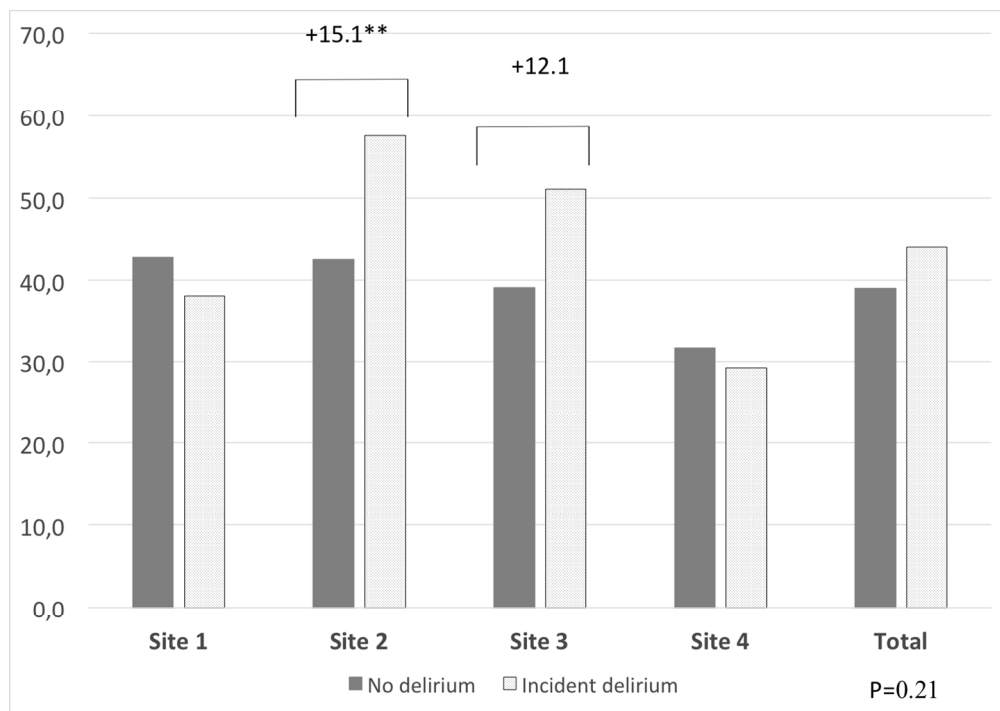

\* Length of stay was adjusted for site, age, Charlson, APACHE, OARS and TICS-m scores. \*\*: Difference between No delirium and Incident delirium in terms of length of ED stay <0.05

1  
2  
3  
4  
5  
6  
7  
8  
9  
10  
11  
12  
13  
14  
15  
16  
17  
18  
19  
20  
21  
22  
23  
24  
25  
26  
27  
28  
29  
30  
31  
32  
33  
34  
35  
36  
37  
38  
39  
40  
41  
42  
43  
44  
45  
46  
47  
48  
49  
50  
51  
52  
53  
54  
55  
56  
57  
58  
59  
60

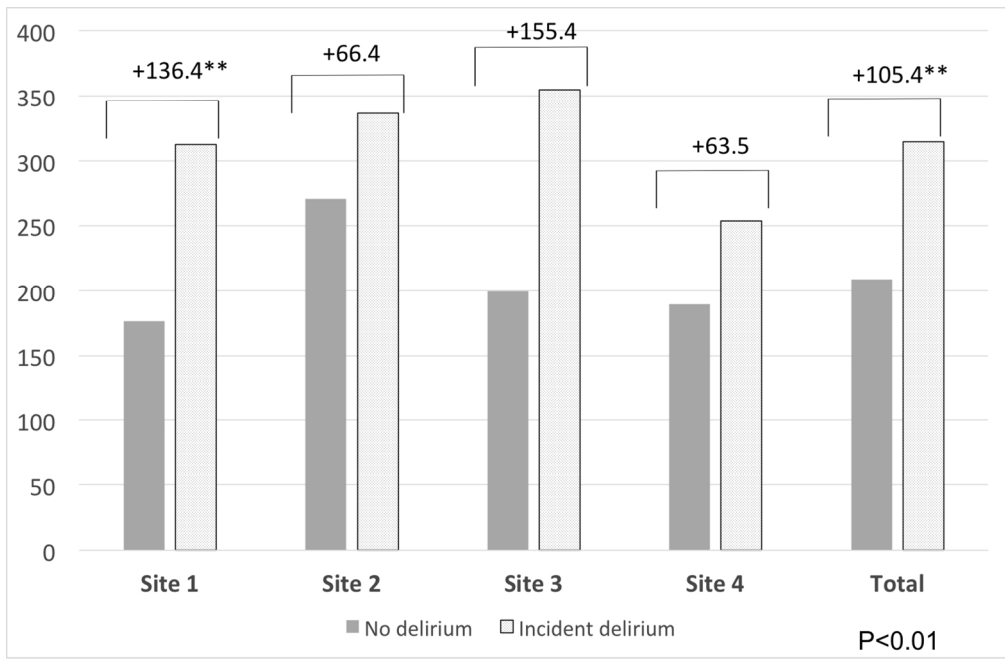

\* Length of stay was adjusted for site, age, Charlson, APACHE, OARS and TICS-m scores. \*\*: Difference between No delirium and Incident delirium in terms of length of ED stay <0.05

Review only

**STROBE 2007 (v4) Statement—Checklist of items that should be included in reports of *cohort studies***

| Section/Topic                | Item # | Recommendation                                                                                                                                                                       | Reported on page # |
|------------------------------|--------|--------------------------------------------------------------------------------------------------------------------------------------------------------------------------------------|--------------------|
| Title and abstract           | 1      | (a) Indicate the study's design with a commonly used term in the title or the abstract                                                                                               | 2                  |
|                              |        | (b) Provide in the abstract an informative and balanced summary of what was done and what was found                                                                                  | 2                  |
| <b>Introduction</b>          |        |                                                                                                                                                                                      |                    |
| Background/rationale         | 2      | Explain the scientific background and rationale for the investigation being reported                                                                                                 | 4                  |
| Objectives                   | 3      | State specific objectives, including any prespecified hypotheses                                                                                                                     | 5                  |
| <b>Methods</b>               |        |                                                                                                                                                                                      |                    |
| Study design                 | 4      | Present key elements of study design early in the paper                                                                                                                              | 6                  |
| Setting                      | 5      | Describe the setting, locations, and relevant dates, including periods of recruitment, exposure, follow-up, and data collection                                                      | 6                  |
| Participants                 | 6      | (a) Give the eligibility criteria, and the sources and methods of selection of participants. Describe methods of follow-up                                                           | 6                  |
|                              |        | (b) For matched studies, give matching criteria and number of exposed and unexposed                                                                                                  | N/A                |
| Variables                    | 7      | Clearly define all outcomes, exposures, predictors, potential confounders, and effect modifiers. Give diagnostic criteria, if applicable                                             | 7                  |
| Data sources/<br>measurement | 8*     | For each variable of interest, give sources of data and details of methods of assessment (measurement). Describe comparability of assessment methods if there is more than one group | 7-8                |
| Bias                         | 9      | Describe any efforts to address potential sources of bias                                                                                                                            | 7-8                |
| Study size                   | 10     | Explain how the study size was arrived at                                                                                                                                            | 9                  |
| Quantitative variables       | 11     | Explain how quantitative variables were handled in the analyses. If applicable, describe which groupings were chosen and why                                                         | 7-8                |
| Statistical methods          | 12     | (a) Describe all statistical methods, including those used to control for confounding                                                                                                | 7-8                |
|                              |        | (b) Describe any methods used to examine subgroups and interactions                                                                                                                  | N/A                |
|                              |        | (c) Explain how missing data were addressed                                                                                                                                          | 9                  |
|                              |        | (d) If applicable, explain how loss to follow-up was addressed                                                                                                                       | N/A                |
|                              |        | (e) Describe any sensitivity analyses                                                                                                                                                | 8                  |
| <b>Results</b>               |        |                                                                                                                                                                                      |                    |

|                          |     |                                                                                                                                                                                                              |     |
|--------------------------|-----|--------------------------------------------------------------------------------------------------------------------------------------------------------------------------------------------------------------|-----|
| Participants             | 13* | (a) Report numbers of individuals at each stage of study—eg numbers potentially eligible, examined for eligibility, confirmed eligible, included in the study, completing follow-up, and analysed            | 9   |
|                          |     | (b) Give reasons for non-participation at each stage                                                                                                                                                         | 9   |
|                          |     | (c) Consider use of a flow diagram                                                                                                                                                                           | 9   |
| Descriptive data         | 14* | (a) Give characteristics of study participants (eg demographic, clinical, social) and information on exposures and potential confounders                                                                     | 9   |
|                          |     | (b) Indicate number of participants with missing data for each variable of interest                                                                                                                          | N/A |
|                          |     | (c) Summarise follow-up time (eg, average and total amount)                                                                                                                                                  | N/A |
| Outcome data             | 15* | Report numbers of outcome events or summary measures over time                                                                                                                                               | N/A |
| Main results             | 16  | (a) Give unadjusted estimates and, if applicable, confounder-adjusted estimates and their precision (eg, 95% confidence interval). Make clear which confounders were adjusted for and why they were included | 9   |
|                          |     | (b) Report category boundaries when continuous variables were categorized                                                                                                                                    | N/A |
|                          |     | (c) If relevant, consider translating estimates of relative risk into absolute risk for a meaningful time period                                                                                             | N/A |
| Other analyses           | 17  | Report other analyses done—eg analyses of subgroups and interactions, and sensitivity analyses                                                                                                               | N/A |
| <b>Discussion</b>        |     |                                                                                                                                                                                                              |     |
| Key results              | 18  | Summarise key results with reference to study objectives                                                                                                                                                     | 10  |
| <b>Limitations</b>       |     |                                                                                                                                                                                                              |     |
| Interpretation           | 20  | Give a cautious overall interpretation of results considering objectives, limitations, multiplicity of analyses, results from similar studies, and other relevant evidence                                   | 10  |
| Generalisability         | 21  | Discuss the generalisability (external validity) of the study results                                                                                                                                        | 11  |
| <b>Other information</b> |     |                                                                                                                                                                                                              |     |
| Funding                  | 22  | Give the source of funding and the role of the funders for the present study and, if applicable, for the original study on which the present article is based                                                | 1   |

\*Give information separately for cases and controls in case-control studies and, if applicable, for exposed and unexposed groups in cohort and cross-sectional studies.

**Note:** An Explanation and Elaboration article discusses each checklist item and gives methodological background and published examples of transparent reporting. The STROBE checklist is best used in conjunction with this article (freely available on the Web sites of PLoS Medicine at <http://www.plosmedicine.org/>, Annals of Internal Medicine at <http://www.annals.org/>, and Epidemiology at <http://www.epidem.com/>). Information on the STROBE Initiative is available at [www.strobe-statement.org](http://www.strobe-statement.org).

# BMJ Open

## Incidence of delirium in the Emergency Department and its consequences on Emergency Department and hospital length of stay : a prospective observational multicentre cohort study in Canadian EDs

|                                 |                                                                                                                                                                                                                                                                                                                                                                                                                                                                                                                                                                                                                                                                                                                                                                                                                                                                                                                                                                                                                                                                                                                                                                                                                                                                                                                                                                                                                                                                                                                                                                                                                                                                                                                                                                                                                                                                                                                                                                                                                                                                                                                                                               |
|---------------------------------|---------------------------------------------------------------------------------------------------------------------------------------------------------------------------------------------------------------------------------------------------------------------------------------------------------------------------------------------------------------------------------------------------------------------------------------------------------------------------------------------------------------------------------------------------------------------------------------------------------------------------------------------------------------------------------------------------------------------------------------------------------------------------------------------------------------------------------------------------------------------------------------------------------------------------------------------------------------------------------------------------------------------------------------------------------------------------------------------------------------------------------------------------------------------------------------------------------------------------------------------------------------------------------------------------------------------------------------------------------------------------------------------------------------------------------------------------------------------------------------------------------------------------------------------------------------------------------------------------------------------------------------------------------------------------------------------------------------------------------------------------------------------------------------------------------------------------------------------------------------------------------------------------------------------------------------------------------------------------------------------------------------------------------------------------------------------------------------------------------------------------------------------------------------|
| Journal:                        | <i>BMJ Open</i>                                                                                                                                                                                                                                                                                                                                                                                                                                                                                                                                                                                                                                                                                                                                                                                                                                                                                                                                                                                                                                                                                                                                                                                                                                                                                                                                                                                                                                                                                                                                                                                                                                                                                                                                                                                                                                                                                                                                                                                                                                                                                                                                               |
| Manuscript ID                   | bmjopen-2017-018190.R1                                                                                                                                                                                                                                                                                                                                                                                                                                                                                                                                                                                                                                                                                                                                                                                                                                                                                                                                                                                                                                                                                                                                                                                                                                                                                                                                                                                                                                                                                                                                                                                                                                                                                                                                                                                                                                                                                                                                                                                                                                                                                                                                        |
| Article Type:                   | Research                                                                                                                                                                                                                                                                                                                                                                                                                                                                                                                                                                                                                                                                                                                                                                                                                                                                                                                                                                                                                                                                                                                                                                                                                                                                                                                                                                                                                                                                                                                                                                                                                                                                                                                                                                                                                                                                                                                                                                                                                                                                                                                                                      |
| Date Submitted by the Author:   | 02-Oct-2017                                                                                                                                                                                                                                                                                                                                                                                                                                                                                                                                                                                                                                                                                                                                                                                                                                                                                                                                                                                                                                                                                                                                                                                                                                                                                                                                                                                                                                                                                                                                                                                                                                                                                                                                                                                                                                                                                                                                                                                                                                                                                                                                                   |
| Complete List of Authors:       | <p>Emond, Marcel; Université Laval Faculté de médecine, Médecine d'urgence; Centre de recherche du CHU de Québec-Université Laval, Axe Santé des populations et pratiques optimales en santé</p> <p>Boucher, Valérie; Centre de recherche du CHU de Québec-Université Laval, Axe Santé des populations et pratiques optimales en santé; Centre d'excellence sur le vieillissement de Québec</p> <p>Carmichael, Pierre-Hugues; Centre d'excellence sur le vieillissement de Québec</p> <p>Voyer, Philippe; Université Laval Faculté de médecine; Centre de recherche du CHU de Québec-Université Laval, Axe Santé des populations et pratiques optimales en santé</p> <p>Pelletier, Mathieu; Université Laval; 7Centre Intégré de Santé et de Services Sociaux de Lanaudière</p> <p>Gouin, Émilie; Centre Hospitalier Régional de Trois-Rivières</p> <p>Daoust, Raoul; Hôpital Sacré-Coeur de Montréal; Université de Montréal</p> <p>Berthelot, Simon; Centre de recherche du CHU de Québec, Axe Santé des populations et pratiques optimales en santé; CHU de Québec-Université Laval, Médecine d'urgence</p> <p>Lamontagne, Marie-Ève; 6Centre interdisciplinaire de recherche en réadaptation et intégration sociale; Université Laval</p> <p>Morin, Michèle; Université Laval; Centre de recherche du CHU de Québec-Université Laval, Axe Santé des populations et pratiques optimales en santé</p> <p>Lemire, Stéphane; Université Laval; Centre de recherche du CHU de Québec-Université Laval, Axe Santé des populations et pratiques optimales en santé</p> <p>Thien Tuong, Minh Vu; Institut de gériatrie de l'Université de Montréal; 11Centre de recherche du Centre hospitalier de l'Université de Montréal</p> <p>Rheault, Marcel; CSSS de Trois-Rivières</p> <p>Juneau, Lucille; Centre Intégré Universitaire de Services Sociaux et de Santé de la Capitale-Nationale</p> <p>Le Sage, Natalie; Centre de recherche du CHU de Québec-Université Laval, Axe Santé des populations et pratiques optimales en santé; CHU de Québec-Université Laval, Médecine d'urgence</p> <p>Lee, Jacques; University of Toronto, Clinical Epidemiology Unit</p> |
| <b>Primary Subject Heading</b>: | Emergency medicine                                                                                                                                                                                                                                                                                                                                                                                                                                                                                                                                                                                                                                                                                                                                                                                                                                                                                                                                                                                                                                                                                                                                                                                                                                                                                                                                                                                                                                                                                                                                                                                                                                                                                                                                                                                                                                                                                                                                                                                                                                                                                                                                            |

1  
2  
3  
4  
5  
6  
7  
8  
9  
10  
11  
12  
13  
14  
15  
16  
17  
18  
19  
20  
21  
22  
23  
24  
25  
26  
27  
28  
29  
30  
31  
32  
33  
34  
35  
36  
37  
38  
39  
40  
41  
42  
43  
44  
45  
46  
47  
48  
49  
50  
51  
52  
53  
54  
55  
56  
57  
58  
59  
60

|                            |                                                                                        |
|----------------------------|----------------------------------------------------------------------------------------|
| Secondary Subject Heading: | Geriatric medicine                                                                     |
| Keywords:                  | Delirium, Emergency Department, Community seniors, Cognitive status, Functional status |
|                            |                                                                                        |

SCHOLARONE™  
Manuscripts

For peer review only

1  
2  
3  
4  
5  
6  
7  
8  
9  
10  
11  
12  
13  
14  
15  
16  
17  
18  
19  
20  
21  
22  
23  
24  
25  
26  
27  
28  
29  
30  
31  
32  
33  
34  
35  
36  
37  
38  
39  
40  
41  
42  
43  
44  
45  
46  
47  
48  
49  
50  
51  
52  
53  
54  
55  
56  
57  
58  
59  
60

## 1 Incidence of delirium in the Emergency Department and its consequences on Emergency 2 Department and hospital length of stay: a prospective observational multicentre cohort 3 study in Canadian EDs

4 Marcel Émond, MD, MSc<sup>1-2-3-4-5</sup>, Valérie Boucher, BA<sup>1-3-4-6</sup>, Pierre-Hugues Carmichael, MSc<sup>4</sup>, Philippe  
5 Voyer RN, PhD<sup>1-3-4</sup>, Mathieu Pelletier, MD<sup>3-7</sup>, Émilie Gouin, MD<sup>8</sup>, Raoul Daoust, MD MSc<sup>9-10</sup>, Simon  
6 Berthelot, MD, MSc<sup>1-2-3</sup>, Marie-Eve Lamontagne, PhD<sup>3-6</sup>, Michèle Morin, MD, MSc<sup>1-3</sup>, Stéphane Lemire,  
7 MD<sup>1-3-4</sup>, Thien Tuong Minh Vu, MD<sup>11-12-13</sup>, Marcel Rheault<sup>14</sup>, Lucille Juneau<sup>15</sup>, Natalie Le Sage, PhD<sup>1-2-3</sup>,  
8 Jacques Lee, MD MSc,<sup>16-17</sup>

9 <sup>1</sup>Axe Santé des populations et pratiques optimales en santé, Centre de recherche du CHU de Québec-  
10 Université Laval, Québec, Canada; <sup>2</sup>Département de médecine d'urgence, CHU de Québec-Université  
11 Laval; <sup>3</sup>Université Laval, Québec, Canada; <sup>4</sup>Centre d'excellence sur le vieillissement de Québec, Québec,  
12 Canada; <sup>5</sup>Centre de recherche sur les soins et les services de première ligne de l'Université Laval; <sup>6</sup>Centre  
13 interdisciplinaire de recherche en réadaptation et intégration sociale, Québec, Canada; <sup>7</sup>Centre Intégré de  
14 Santé et de Services Sociaux de Lanaudière, Joliette, Canada; <sup>8</sup>Centre Hospitalier Régional de Trois-  
15 Rivières, Trois-Rivières, Canada; <sup>9</sup>Centre de recherche de l'Hôpital du Sacré-Cœur de Montréal,  
16 Montréal, Canada; <sup>10</sup>Université de Montréal, Montréal, Canada; <sup>11</sup>Centre de recherche du Centre  
17 hospitalier de l'Université de Montréal, Montréal, Canada; <sup>12</sup>Centre hospitalier de l'Université de  
18 Montréal; <sup>13</sup>Institut de gériatrie de l'Université de Montréal, Montréal, Canada; <sup>14</sup>CSSS de Trois-Rivières;  
19 <sup>15</sup>Centre Intégré Universitaire de Services Sociaux et de Santé de la Capitale-Nationale; <sup>16</sup>Department of  
20 Family and Community Medicine, University of Toronto, Toronto, Canada; <sup>17</sup>Sunnybrook Health  
21 Sciences center, Toronto, Canada;

22 **Corresponding author:** Marcel Émond MD, MSc, FRCP(C), CHU de Québec - Hôpital de l'Enfant-Jésus,  
23 1401, 18<sup>e</sup> rue, H-608, Québec (Québec) G1J 1Z4, Canada. Phone: (418) 649-0252, ext. 66423, Fax: (418)  
24 649-5832, Email: [marcel.emond@fmed.ulaval.ca](mailto:marcel.emond@fmed.ulaval.ca)

25  
26 3203 words

27  
28 **Authors' contribution:** MÉ had full access to all of the data in the study and takes responsibility for the  
29 integrity of the data and the accuracy of the data analysis. He was responsible of design, funding,  
30 conduct of the study and writing of the manuscript. VB managed the study, led the analyses and wrote  
31 the manuscript. MÉ, VB and PHC were involved in the statistical analysis, and data interpretation. MP,  
32 RD, EG and MEL were responsible for all four site recruitment. PV, SB, MM, TTMV, JL, MR, SL, NLS and LJ  
33 are all collaborator of INDEED project. PHC, MP, RD, EG, MEL, PV, SB, MM, TTMV, JL, MR, SL, NLS and LJ  
34 reviewed, and approve the manuscript.



## 1 ABSTRACT

2 **Objective:** We aim to determine the incidence of delirium and describe its impacts on  
3 Emergency department (ED) and hospital length of stay (LOS) among admitted older adults with  
4 an 8-hour exposure to the ED environment.

5 **Design:** This is a prospective observational multicentre cohort study (March-July 2015). Patients  
6 were assessed 2x/day during their entire ED stay and up to 24 hours on hospital ward.

7 **Setting:** The study took place in 4 Canadian EDs.

8 **Participants:** 338 included patients: 1) aged  $\geq 65$ ; 2) who had an ED stay  $\geq 8$  hours; 3) were  
9 admitted to hospital ward; 4) were independent/semi-independent.

10 **Main Outcome(s) and Measure(s):** The primary outcomes of this study were incident delirium  
11 in the ED or within 24 h of ward admission and ED and hospital LOS. Functional and cognitive  
12 status were assessed using validated Older Americans' Resources and Services (OARS) and the  
13 Telephone Interview for Cognitive Status- modified (TICS-m) tools. The Confusion Assessment  
14 Method (CAM) was used to detect incident delirium. Univariate and multivariate analyses were  
15 conducted to evaluate outcomes.

16 **Results:** Mean age was 76.8 ( $\pm 8.1$ ), 17.7% were aged  $>85$  years old and 48.8% were male. The  
17 mean incidence of delirium was 12.1% (n=41). Median Interquartile range ED LOS was  
18 32.4 (24.5–47.9) hours and hospital LOS was 146.6 (75.2-267.8) hours. Adjusted mean ED LOS  
19 and mean hospital LOS were increased respectively by 5.0 hours (95% CI [-1.4, 14.1], p=0.06)  
20 and by 105.4 hours (4.4 days) (95% CI: [25.1, 162.0], p< 0.001) for patients who developed an  
21 episode of delirium compared to non-delirious patient.

22 **Conclusions:** An incident delirium was observed in 1 of 8 independent/semi-independent older  
23 adults after an 8-hour ED exposure. An episode of delirium increases hospital LOS by 4 days  
24 and therefore has important implications for patients and could contribute to ED overcrowding  
25 through a deleterious feedback loop.

26

1  
2  
3 1 **Strengths and limitations of this study**  
4

- 5 2 - **Largest prospective study on incident delirium in the Emergency Department.**  
6 3 - **A systematic screening of delirium at study entry was realized with a validated tool.**  
7 4 - **Multiple patient assessments for incident delirium were conducted.**  
8 5 - **Study population was limited to independent/semi-independent elders, which may**  
9 6 **limit external validity of the findings.**  
10 7 - **Hospital LOS were adjusted for potential cofounders relating to geriatric care.**  
11  
12  
13 8

14  
15  
16  
17  
18  
19  
20  
21  
22  
23  
24  
25  
26  
27  
28  
29  
30  
31  
32  
33  
34  
35  
36  
37  
38  
39  
40  
41  
42  
43  
44  
45  
46  
47  
48  
49  
50  
51  
52  
53  
54  
55  
56  
57  
58  
59  
60

For peer review only

## 1 INTRODUCTION

2 In 2016, the youngest of the "baby-boomers" turned 50 years old and people aged 65 and older  
3 represented 18.1% of the population in Quebec.(1) It is foreseen that by 2031, the proportion of  
4 older adults aged over 65 will nearly double, with a major increase among those aged 85 and  
5 older.(2) Over the coming decades, those demographic trends will fundamentally change the  
6 make-up of the population served by Quebec Emergency Departments (ED). Older adults are  
7 already the main users of emergency health care services(3-5) and in 2012-2013, 40% of ED  
8 stretchers were occupied by patients aged over 65.(6) Furthermore, patients over 75 years of age  
9 have the highest ED visit rate of any age group and in 2012-2013 those patients occupied 25% of  
10 ED stretchers.(7, 8) Those numbers will only increase over time as the older adults population  
11 grows and this "Silver Tsunami"(9) will have major consequences on the healthcare of seniors  
12 and on our health care system in general.

13 Caring for older patients in the ED is particularly challenging.(10) Indeed, the time-pressure  
14 environment and high level of background noise may impede efficient communications with  
15 older patients.(11, 12) Moreover, specialized geriatric training for ED health professionals  
16 remains in its infancy(13) and they may not be as equipped as they should be to face the specific  
17 issues of older patients. All of this may contribute to the fact that older adults have higher rates  
18 of unplanned returns to the ED,(14, 15) of hospitalization,(16) falls,(17) loss of  
19 independence(18) and unrecognized delirium(19-21) following an emergency visit. Delirium is  
20 an acute brain dysfunction defined as a mental disorder of acute onset with a fluctuating course,  
21 characterized by a disturbance in consciousness, attention, orientation, memory, thought,  
22 perception and behavior.(22, 23) It is a common problem in the ED and its prevalence in older  
23 patients admitted to acute and long-term care facilities ranges between 9.6% and 89%.(21, 24-  
24 26)

25 In August of 2013, Inouye *et al.* published a systematic review(27) in which they found no study  
26 reporting the incidence of delirium in the ED. The same author also demonstrated that an ED  
27 stay of 12 hours or more was one of the strongest independent predictors of the onset of  
28 subsequent delirium in older patients.(28-30) This is of increasing concern, as recent ED wait  
29 times have become quite significant. Since then, a few prospective studies were conducted in  
30 order to explore the problem of ED-stay associated delirium.(30-32) To our knowledge, there are  
31 few multicenter studies aimed at describing the incidence of delirium in ED of developed  
32 countries, such as Canada. Because the literature regarding the incidence of delirium in the ED  
33 and its potential impacts on hospital length of stay (LOS), functional status and unplanned ED  
34 readmissions is scant, its consequences have yet to be clearly identified in order to orient modern  
35 acute medical care. A study by McCusker *et al.* even found that hospital stay was increased by  
36 7.78 days for patients diagnosed with delirium (either prevalent or incident) during the first 7  
37 days of their stay.(33) The onset of such complication in the ED could influence hospital LOS  
38 and reflect back on ED crowding and older adults' use of emergency health services. The present  
39 study focused on the incidence of delirium induced by emergency department stay. Although  
40 ED-induced delirium could be affected by acute illness, comorbidities, ED crowding metrics and  
41 health care providers' ability to provide basic care known to prevent delirium, we hypothesized  
42 that the incidence of new cases of delirium among older ED patients who are admitted to hospital  
43 affects a significant proportion of community older adults, and ED-induced delirium leads to

1  
2  
3 1 longer hospital LOS creating a deleterious feedback loop on ED care and operations (34). The  
4 2 study focused on the incident delirium, because in opposite to prevalent delirium, ED services  
5 3 can act in a way to prevent it.  
6

7 4 The objective of this study was to fill a basic knowledge gap regarding the incidence of delirium  
8 5 and its impacts on ED and hospital LOS for older, community independent/semi-independent,  
9 6 non-delirious ED patients with an 8-hour ED stay who are admitted to a hospital ward.  
10  
11  
12 7  
13  
14  
15  
16  
17  
18  
19  
20  
21  
22  
23  
24  
25  
26  
27  
28  
29  
30  
31  
32  
33  
34  
35  
36  
37  
38  
39  
40  
41  
42  
43  
44  
45  
46  
47  
48  
49  
50  
51  
52  
53  
54  
55  
56  
57  
58  
59  
60

For peer review only

## 1 METHODS

### 2 Study setting and population

3 This prospective multicenter study included patients who presented to one of the 4 participating  
4 Quebec EDs (two university-affiliated level 1 trauma centers and two regional hospitals)  
5 between March and July 2015. **Inclusion criteria** were: 1) Patients aged 65 and over; 2) Patients  
6 with an ED stay of  $\geq 8$  hours; 3) Patients needing and/or waiting for admission to any hospital  
7 ward; 4) Independent or semi-independent patients (able to perform 5/7 activities of daily living  
8 according to the Older Americans Resources and Services scale (OARS)). **Exclusion criteria**  
9 were: 1) Patient with unstable medical condition requiring admission to the psychiatric ward,  
10 intensive or palliative care units; 2) Patient who are unable to consent; 3) Patients who live (or  
11 are in transition) in a long-term care facility; 4) Patients unable to speak French or English;  
12 5) Patients presenting a delirium before coming to the ED, upon arrival or by the end of the first  
13 8 hours in the ED; 6) Patients with a history of psychiatric disorders (such as schizophrenia,  
14 psychotic symptoms and bipolar disorder).

15 Based on soon to be published new recommendations from the Direction Nationale des Urgences  
16 regarding older patients' lengths of ED stay, which should be kept under 8 hours, we choose an  
17 8-hour exposure for our patients, as opposed to the 12-hour exposure previously determined to  
18 be a predictor of subsequent delirium (28-30). Our pragmatic approach led us to include patients  
19 who need or are awaiting admission to a hospital ward; since, Caplan *et al.* showed that patients  
20 admitted to hospital have a significantly at higher proportion of delirium than their equivalent  
21 counterparts discharged and treated with home resources.(35) Also, even if we know that  
22 delirium is more prevalent in this population, we chose to exclude patients who are not  
23 independent or semi-independent, because we were mainly interested to investigate the impact of  
24 delirium on the most robust older patients. In addition, we chose to exclude patients who were  
25 unable to consent, because assessing initial interview and follow-up with those patients would  
26 have been difficult.

27 Potential participants were identified using the emergency department information system.  
28 Research assistants (RAs) obtained consent and screened the participants for eligibility after their  
29 8-hour exposure to the ED. Sociodemographic, medical and comorbidity data were collected  
30 upon initial interview. RAs also assessed patients' baseline physical, frailty and cognitive status.  
31 Patients were screened for delirium during initial interview, and twice a day (with at least  
32 6 hours between each evaluation) during their entire ED stay and up to 24 hours after being  
33 admitted to a hospital ward. Potential participants were considered as "missed" when they was  
34 no RA on-site for the recruitment. RAs were on site for the screening of patients about 12 hours  
35 a day, 7 days a week.

### 36 Measures

37 Patients' frailty and physical status were assessed using respectively the Clinical Frailty Scale  
38 (CFS) (36) and the Older Americans Resources and Services scale (OARS)(37),while the  
39 Telephone Interview for Cognitive Status-modified (TICS-m),(38) the Confusion Assessment  
40 Method (CAM) (39) and the Delirium Index (40), were used to assess cognitive status. Other

1  
2  
3 1 information on medications, comorbidities (Charlson comorbidity risk index) (41), severity of  
4 2 illness (Acute Physiological and Chronic Health Evaluation II (APACHE II) (42) and ED  
5 3 environment evaluation were collected in addition to sociodemographic data.

7 4 The CAM is the most commonly used tool for the detection of delirium with its sensitivity  
8 5 ranging between 34% and 58% and its specificity between 89% and 94% when performed by a  
9 6 research assistant. However, even if this sensitivity seems low, it has been shown that when the  
10 7 CAM is administered several times during a shift, it is more sensitive than a diagnosis made by a  
11 8 psychiatrist.(43) Because of the fluctuating nature of delirium, patients were systematically  
12 9 assessed with the CAM and the Delirium Index (a validated tool used to measure the severity of  
13 10 delirium) (40) twice a day during their entire ED stay. Furthermore, the CAM was used over a  
14 11 24-hour period following transfer to the hospital ward. ED and ward nurses and doctors were  
15 12 blinded to the study's objectives in order to avoid them changing their practice. The TICS-m was  
16 13 used to assess baseline cognitive status of our study participants.(44) ED environmental  
17 14 information, such as presence of proper lighting (according to the RAs), patient's hydration,  
18 15 presence of physical restraints or medical interventions limiting movement at initial interview  
19 16 and presence of a family member or a friend at initial interview was also recorded by RAs.

21 17 Each site's team of RAs received standardized training by an experienced member of the  
22 18 mentoring team of the *Centre d'Excellence sur le Vieillissement de Québec*(45), who also  
23 19 specializes in the administration of the CAM. They also attended a group training session  
24 20 conducted by the study coordinator and an experienced research nurse and underwent a 5-hour  
25 21 personalized field training. They were also provided with a detailed training manual. Inter-rater  
26 22 reliability was assessed during patient follow-ups at the coordinating site to ensure that the test  
27 23 was administered in a standardized manner.

28 24 In order to be sure that the missed patients were similar to our participants, some data were  
29 25 collected on those missed patients, such as their gender, their date of birth, their Charlson  
30 26 Comorbidity Score and their score at the Canadian Triage Assessment Scale (CTAS). As well,  
31 27 the incidence of delirium was collected for those patients.

## 32 28 **Outcomes**

33 29 Incident delirium during the patients' ED-stay was the main outcome of this study, as well as ED  
34 30 and hospital LOS. Incident delirium was defined by a delirium who occurred either in the ED or  
35 31 in the first 24 hours of the hospital stay. The CAM was administrated during the initial interview  
36 32 ensuring that the patient was not already delirious after the first 8 hours of their ED stay.

37 33 There are two existing interpretation methods to the CAM scores: the sensitive (SENS) and the  
38 34 specific (SPEC) methods.(46) A patient is diagnosed with delirium according the SPEC method  
39 35 if they: had an acute onset, a fluctuation in any of the items evaluated in the CAM (inattention,  
40 36 disorganized thinking, altered level of consciousness, disorientation, memory, sensory  
41 37 disturbances, psycho-motor activity, sleep disturbances) as well as inattention and either  
42 38 disorganized thinking or altered state of consciousness.(25) A patient has delirium according to  
43 39 the SENS method if they: had either an acute onset or a fluctuation in any of the items evaluated

1  
2  
3 1 in the CAM, inattention and either disorganized thinking or altered state of consciousness.(25)  
4 2 The SENS method was used to ascertain delirium.  
5

6 3 ED LOS was measured from the date and time of triage up to the date and time when the patients  
7 4 were physically transferred to the hospital ward. Hospital LOS was also measured from ED  
8 5 triage up to the date and time of hospital discharge. ED and hospital LOS were compared  
9 6 between patients with a positive CAM and those with a negative CAM for each site.  
10  
11

## 12 7 **Statistical analyses**

13  
14 8 Descriptive statistics were computed on patient characteristics and measured outcomes.  
15 9 Cumulative incidence rates are estimated using Kaplan-Meier curves. ED and hospital LOS is  
16 10 compared in patients with and without incident delirium in the various sites using multiple linear  
17 11 regression, adjusting for APACHE, Charlson, OARS, age and TICS-m. Site and its interaction  
18 12 with incident delirium is treated as a fixed factor. TICS-m scores were adjusted for patients'  
19 13 level of education. Kappa statistics were computed to measure inter-rater reliability of the CAM.  
20 14 Based on an alpha of 5%, 138 patients would allow 80% power for an estimated overall  
21 15 incidence proportion of 15 % with 5% precision. Analyses were performed using SAS, version  
22 16 9.4 (SAS Institute, Inc., Cary, NC).  
23  
24  
25

26 17 The Comité d'éthique du CHU de Québec acted as the centralized research ethics board and  
27 18 approved this study (project # MP-20-2015-2130). Written consent was obtained for each study  
28 19 participant. Patient records/information were anonymized prior to analysis.  
29  
30  
31  
32  
33  
34  
35  
36  
37  
38  
39  
40  
41  
42  
43  
44  
45  
46  
47  
48  
49  
50  
51  
52  
53  
54  
55  
56  
57  
58  
59  
60

## 1 RESULTS

### 2 Population

3 A total of 2699 patients were screened by research assistants across our 4 sites (figure 1). Of  
4 those, 1780 did not meet our inclusion criteria or had one of our exclusion criteria, 417 were  
5 missed and 164 refused to participate to the study. This leaves us with a sample of 338 patients  
6 (12.5%). Females represented 51.2% of our population and mean age was 76.8 ( $\pm 8.09$ ) (table 1).

7 A sample analysis of patients who were missed revealed that they had a similar profile to that of  
8 those who were included in our study. 54.9% were female, with a mean age of 77.4 ( $\pm 9.4$ ) years  
9 old. The mean Charlson Comorbidity Score was 1.7 ( $\pm 1.7$ ), 36.7% were considered level 1 or 2  
10 on the Canadian Triage Assessment Scale (CTAS) and 38% were level 3. The medical notes  
11 revealed only one case of incident delirium within 24 hours of triage for this group of patients.  
12 Table 1 provides details on sociodemographic and environmental variables.

### 13 Incidence of delirium

14 In our cohort, we found that the overall incidence of delirium was 12.1% (n=41) using the SENS  
15 method, overall incidence and its distribution across sites are provided in figure 2. Fourteen cases  
16 occurred in the ED, while 27 cases occurred on the ward. Our results indicate that the delirium  
17 incidence rate was 2.9 cases per 1000 patient-hours. Figure 3 shows a cumulative incidence of  
18 delirium curve. Median ED LOS before developing a delirium was 45.2 h (38.0-52.5). Inter-rater  
19 agreements were performed at the coordinating site on 12% of the site's participants. A perfect  
20 agreement was obtained regarding the incidence of delirium, and agreement for each of the CAM  
21 items had Kappa ranging between 0.63 and 1.0.

### 23 ED and hospital length of stay

24 Median (IQR) ED LOS was 32.4 (24.5–47.9) hours. When adjusting for site, age, Charlson,  
25 APACHE, OARS and TICS-m scores, a difference of 5.0 hours was found in the average  
26 adjusted ED LOS between individuals who developed a delirium and those who did not (p=0.21)  
27 (see Figure 4). Of note, a statistically significant difference was found for site 2 (p=0.03).  
28 Therefore, patients who developed incident delirium generally had slightly longer exposure to  
29 the ED environment than patients who did not develop the condition.

30 Median (IQR) hospital LOS was 146.6 (75.2-267.8) hours. On average, adjusted hospital LOS  
31 was 209 hours (8.7 days) for non-delirious participants while patients who were found to have  
32 incident delirium had a 314.4-hour (13.1 days) hospital stay. The hospital LOS for each site are  
33 shown in Figure 5. Mean hospital adjusted LOS was significantly increased by 105.4 hours (4.4  
34 days) in the delirious patients compared to non-delirious patient (p=0.003).

35



## 1 DISCUSSION

2 Our study is, to our knowledge, the first large Canadian prospective study aiming to determine  
3 the incidence of delirium induced by ED stay in older patients and then to analyze its impacts on  
4 the length of in-hospital stay. We found a 12.1% incidence for delirium in our cohort of  
5 338 older patients. Our study determined that there was a statistically significant association  
6 between incident delirium and hospital LOS, which was increased by 4.4 days in patients with  
7 incident delirium. A statistically non-significant increase of 5.0 hours was also found in the  
8 average ED LOS between those 2 groups, but this increase is of clinical importance for patient  
9 care.

10 Our results confirm the clinical importance of incident delirium in acute medicine care. A  
11 previous Canadian retrospective study was conducted by our team(47) using a chart-based  
12 CAM,(48) in which an 18% incidence of delirium was found in 200 patients medical charts. Half  
13 of those patients developed a delirium within 36 hours of arrival to the ED. It was shown  
14 previously that in prevalent delirious older ED patients that delirium is a predictor of prolonged  
15 hospital LOS (31). With our results, we confirm that incident delirium also has such result.  
16 However, contrary to prevalent delirium, it is possible to change the interventions in hospital to  
17 prevent this episode that has been shown to influence hospital LOS and long-term function and  
18 cognition (49).

19 In 2011, the Ministère de la Santé et des Services Sociaux has published its provincial guide  
20 "Approche adaptée à la personne âgée en milieu hospitalier", (50) a senior-friendly initiative  
21 which aimed to better address the in-hospital care of elders. This initiative stresses the  
22 importance of keeping lengths of stay as short as possible for older adults and presents various  
23 methods to prevent delirium. Every hospital in the province has implemented these guidelines at  
24 different levels. However, our results show that over 4 years post-implementation, ED lengths of  
25 stay for older patients are still quite significant in Quebec, increasing their risk of developing  
26 delirium according to previous studies. Our results also clearly confirm the fact that patients with  
27 incident delirium have longer hospital length of stay, making them more at risk for further  
28 complications. We also recorded an important difference in incident delirium across the 4 study  
29 sites, varying from 8.3% to 20%. Although inter-site comparisons were not powered by our  
30 sample size, many factors could have explained this difference. The different level of  
31 implementation of the provincial senior-friendly guidelines at each site could be a possible cause.

32 Our study has some limitations. Our high rate of missed patients is mainly due to logistic  
33 constraints. However, after comparing the socio-demographic characteristics and comorbidities,  
34 we have found no significant difference between patients who were included and those who were  
35 missed. Furthermore, including those missed patients would likely have reinforced our results,  
36 resulting in higher delirium rates and longer ED and hospital LOS. Therefore, we believe the  
37 likelihood of selection bias is low. Our cohort represents only a portion of the older adults  
38 population usually seen in the ED. We have chosen to exclude patients with moderate to severe  
39 dementia, those who lived in long-term nursing homes, those with pre-existing psychological  
40 conditions and patients who had a lesser functional level. We have made this decision because  
41 we were mainly interested to investigate the impact of delirium on the most robust older patients.  
42 The CAM was administered by different research assistants, and therefore this might have  
43 underestimated or overestimated the frequency of an acute onset of a new symptom. This may  
44 have introduced an interviewer bias; however, this situation is not any different from real-life

1  
2  
3 1 clinical practice. We tried to decrease this potential bias by providing research assistants with  
4 2 standardized training, which was proven effective given our good inter-observer agreement. The  
5 3 study coordinator also reviewed every single research file to ensure completeness.

7  
8 4 This study aimed at assessing the present situation in our Canadian EDs regarding the incidence  
9 5 of delirium induced by a prolonged ED-stay in independent and semi-independent older patients.  
10 6 The high incidence rate and increased hospital LOS are alarming and could have substantial  
11 7 consequences for the patient and for our health care system in general. Delirium itself is an  
12 8 economic burden in the United States as it is estimated to 152\$ billion per year.(31)

14  
15 9 An interesting solution to this issue might be the use of a short triage tool aiming to identify  
16 10 patients more at risk of developing a delirium during their ED stay. Delaney *et al.* found that  
17 11 implementing an alert into the EMR system for triage nurses to screen every patient over 65  
18 12 years old for delirium helped ED nurses better identify 23% of patients as potentially positive for  
19 13 delirium.(32) However, more research is needed in order to identify an appropriate tool to be  
20 14 used by triage nurses.

22  
23 15  
24 16 **Grant:** This study was funded by the Fond Québécois de Recherche en Santé (FQRS 29307).

26 17 **Conflicts of interest:** None

28  
29 18 **Acknowledgements:** We would like to thank all the research assistants who participated in the  
30 19 recruitment of patients.

31  
32 20 **Data sharing statement:** Being a prospective observational multicentre study, this project  
33 21 includes other data results to be solely used by our research team. The data use is guide by a  
34 22 public funding agency - FQRS

## 1 REFERENCES

1. Gouvernement du Québec - Institut de la statistique du Québec. Le bilan démographique du Québec. 2016.
2. Heffler S, Levitt K, Smith S, Smith C, Cowan C, Lazenby H, et al. Health spending growth up in 1999; Faster growth expected in the future. *Health affairs*. 1999;20(2):193-203.
3. Data warehouse on trends in health and aging 2002. Available from: [www.cdc.gov/nchs/about/otheract/aging/trenddata.htm](http://www.cdc.gov/nchs/about/otheract/aging/trenddata.htm).
4. Mathews M, Barnsley J. Patients seeking care during acute illness. Why do they not see their regular physicians? *Can Fam Physician*. 2003;49:1498-503. PubMed PMID: 14649989.
5. Hahn B, Lefkowitz D. Annual expenses and sources of payment for health care services. Rockville, MD: Agency For Health Care Policy and Research, Public Health Service, 1992 14 DHHS Pub. No AHCPR 93-0007.
6. Le Commissaire à la santé et au bien-être (CSBE). Les Urgences au Québec : Évolution de 2003-2004 à 2012-2013. 2014.
7. Burt CW, McCaig LF. Trends in hospital emergency department utilization: United States, 1992-99. *Vital Health Stat* 13. 2001(150):1-34. PubMed PMID: 11577602.
8. McCaig LF, Burt CW. National Hospital Ambulatory Medical Care Survey: 2002 emergency department summary. *Adv Data*. 2004(340):1-34. PubMed PMID: 15068333.
9. Delafuente JC. The silver tsunami is coming: will pharmacy be swept away with the tide? *American journal of pharmaceutical education*. 2009;73(1):1. PubMed PMID: 19513138; PubMed Central PMCID: PMC2690864.
10. Hwang U, Morrison RS. The geriatric emergency department. *J Am Geriatr Soc*. 2007;55(11):1873-6. Epub 2007/10/06. doi: 10.1111/j.1532-5415.2007.01400.x. PubMed PMID: 17916122.
11. Baraff LJ, Bernstein E, Bradley K, Franken C, Gerson LW, Hannegan SR, et al. Perceptions of emergency care by the elderly: results of multicenter focus group interviews. *Ann Emerg Med*. 1992;21(7):814-8. PubMed PMID: 1610038.
12. Moons P, Arnauts H, Delooz HH. Nursing issues in care for the elderly in the emergency department: an overview of the literature. *Accid Emerg Nurs*. 2003;11(2):112-20. PubMed PMID: 12633630.
13. Hedges JR, Singal BM, Rousseau EW, Sanders AB, Bernstein E, McNamara RM, et al. Geriatric patient emergency visits. Part II: Perceptions of visits by geriatric and younger patients. *Ann Emerg Med*. 1992;21(7):808-13. Epub 1992/07/01. doi: S0196-0644(05)81026-1 [pii]. PubMed PMID: 1610037.
14. Boulton C, Dowd B, McCaffrey D, Boulton L, Hernandez R, Krulwich H. Screening elders for risk of hospital admission. *Journal of the American Geriatrics Society*. 1993;41(8):811-7. PubMed PMID: 8340558.
15. Friedmann PD, Jin L, Karrison TG, Hayley DC, Mulliken R, Walter J, et al. Early revisit, hospitalization, or death among older persons discharged from the ED. *Am J Emerg Med*. 2001;19(2):125-9. PubMed PMID: 11239256.
16. Marcantonio ER, McKean S, Goldfinger M, Kleefield S, Yurkofsky M, Brennan TA. Factors associated with unplanned hospital readmission among patients 65 years of age and older in a Medicare managed care plan. *Am J Med*. 1999;107(1):13-7. PubMed PMID: 10403347.
17. Speechley M, Tinetti M. Falls and injuries in frail and vigorous community elderly persons. *Journal of the American Geriatrics Society*. 1991;39(1):46-52. PubMed PMID: 1987256.
18. Aminzadeh F, Dalziel WB. Older adults in the emergency department: a systematic review of patterns of use, adverse outcomes, and effectiveness of interventions. *Ann Emerg Med*. 2002;39(3):238-47. PubMed PMID: 11867975.

19. Hustey FM, Meldon SW. The prevalence and documentation of impaired mental status in elderly emergency department patients. *Ann Emerg Med.* 2002;39(3):248-53. PubMed PMID: 11867976.
20. Han JH, Zimmerman EE, Cutler N, Schnelle J, Morandi A, Dittus RS, et al. Delirium in older emergency department patients: recognition, risk factors, and psychomotor subtypes. *Acad Emerg Med.* 2009;16(3):193-200. Epub 2009/01/22. doi: 10.1111/j.1553-2712.2008.00339.x. PubMed PMID: 19154565; PubMed Central PMCID: PMCPMC5015887.
21. Elie M, Rousseau F, Cole M, Primeau F, McCusker J, Bellavance F. Prevalence and detection of delirium in elderly emergency department patients. *CMAJ : Canadian Medical Association journal = journal de l'Association medicale canadienne.* 2000;163(8):977-81. Epub 2000/11/09. PubMed PMID: 11068569; PubMed Central PMCID: PMC80546.
22. Cole MG. Delirium in elderly patients. *The American journal of geriatric psychiatry : official journal of the American Association for Geriatric Psychiatry.* 2004;12(1):7-21. PubMed PMID: 14729554.
23. Han JH, Wilber ST. Altered mental status in older patients in the emergency department. *Clinics in geriatric medicine.* 2013;29(1):101-36. Epub 2012/11/28. doi: 10.1016/j.cger.2012.09.005. PubMed PMID: 23177603; PubMed Central PMCID: PMCPMC3614410.
24. Fick DM, Agostini JV, Inouye SK. Delirium superimposed on dementia: a systematic review. *J Am Geriatr Soc.* 2002;50(10):1723-32. PubMed PMID: 12366629.
25. Lemienre J, Nelis T, Joosten E, Braes T, Foreman M, Gastmans C, et al. Detection of delirium by bedside nurses using the confusion assessment method. *J Am Geriatr Soc.* 2006;54(4):685-9. Epub 2006/05/12. doi: 10.1111/j.1532-5415.2006.00667.x. PubMed PMID: 16686883.
26. Voyer P, Richard S, Doucet L, Carmichael PH. Detecting delirium and subsyndromal delirium using different diagnostic criteria among demented long-term care residents. *Journal of the American Medical Directors Association.* 2009;10(3):181-8. PubMed PMID: 19233058.
27. Inouye SK, Westendorp RG, Saczynski JS. Delirium in elderly people. *Lancet.* 2014;383(9920):911-22. Epub 2013/09/03. doi: S0140-6736(13)60688-1 [pii] 10.1016/S0140-6736(13)60688-1. PubMed PMID: 23992774.
28. Inouye SK, Viscoli CM, Horwitz RI, Hurst LD, Tinetti ME. A predictive model for delirium in hospitalized elderly medical patients based on admission characteristics. *Ann Intern Med.* 1993;119(6):474-81. PubMed PMID: 8357112.
29. Inouye SK, Charpentier PA. Precipitating factors for delirium in hospitalized elderly persons. Predictive model and interrelationship with baseline vulnerability. *Jama.* 1996;275(11):852-7. PubMed PMID: 8596223.
30. Bo M, Bonetto M, Bottignole G, Porrino P, Coppo E, Tibaldi M, et al. Length of Stay in the Emergency Department and Occurrence of Delirium in Older Medical Patients. *J Am Geriatr Soc.* 2016;64(5):1114-9. Epub 2016/05/11. doi: 10.1111/jgs.14103. PubMed PMID: 27160482.
31. Han JH, Eden S, Shintani A, Morandi A, Schnelle J, Dittus RS, et al. Delirium in older emergency department patients is an independent predictor of hospital length of stay. *Acad Emerg Med.* 2011;18(5):451-7. Epub 2011/04/28. doi: 10.1111/j.1553-2712.2011.01065.x. PubMed PMID: 21521405; PubMed Central PMCID: PMCPMC3768130.
32. Delaney M, Pepin J, Somes J. Emergency Department Delirium Screening Improves Care and Reduces Revisits for the Older Adult Patient. *J Emerg Nurs.* 2015;41(6):521-4. Epub 2015/09/28. doi: 10.1016/j.jen.2015.08.013. PubMed PMID: 26409656.
33. McCusker J, Cole MG, Dendukuri N, Belzile E. Does delirium increase hospital stay? *J Am Geriatr Soc.* 2003;51(11):1539-46. Epub 2003/12/23. PubMed PMID: 14687382.
34. Forster AJ, Stiell I, Wells G, Lee AJ, van Wieringen C. The effect of hospital occupancy on emergency department length of stay and patient disposition. *Academic Emergency Medicine.* 2003;10:127-33.

- 1  
2  
3 1 35. Caplan GA, Coconis J, Woods J. Effect of hospital in the home treatment on physical and  
4 2 cognitive function: a randomized controlled trial. *J Gerontol A Biol Sci Med Sci*. 2005;60(8):1035-8. Epub  
5 3 2005/08/30. doi: 60/8/1035 [pii]. PubMed PMID: 16127109.
- 6 4 36. Rockwood K, Song X, MacKnight C, Bergman H, Hogan DB, McDowell I, et al. A global clinical  
7 5 measure of fitness and frailty in elderly people. *CMAJ : Canadian Medical Association journal = journal*  
8 6 *de l'Association medicale canadienne*. 2005;173(5):489-95. Epub 2005/09/01. doi: 173/5/489 [pii]  
10 7 10.1503/cmaj.050051. PubMed PMID: 16129869; PubMed Central PMCID: PMC1188185.
- 11 8 37. Fillenbaum GG, Duke U. Multidimensional functional assessment of older adults: the Duke Older  
12 9 Americans Resources and Services procedures. Hillsdale, NJ: L. Erlbaum Associates; 1988. xii, 179 p. p.
- 13 10 38. de Jager C, Budge M, Clarke R. Utility of TICS-M for the assessment of cognitive function in older  
14 11 adults. *International journal of geriatric psychiatry*. 2003;18(4):318-24.
- 15 12 39. Inouye SK, van Dyck CH, Alessi CA, Balkin S, Siegel AP, Horwitz RI. Clarifying confusion: the  
16 13 confusion assessment method. A new method for detection of delirium. *Ann Intern Med*.  
17 14 1990;113(12):941-8. PubMed PMID: 2240918.
- 18 15 40. McCusker J, Cole MG, Dendukuri N, Belzile E. The delirium index, a measure of the severity of  
19 16 delirium: new findings on reliability, validity, and responsiveness. *J Am Geriatr Soc*. 2004;52(10):1744-9.  
20 17 Epub 2004/09/29. doi: 10.1111/j.1532-5415.2004.52471.x. PubMed PMID: 15450055.
- 21 18 41. Frenkel WJ, Jongerius EJ, Mandies-van Uiter MJ, van Munster BC, De Rooij SE. Validation of the  
22 19 Charlson comorbidity index in acutely hospitalized elderly adults: a prospective cohort study. *Journal of*  
23 20 *the American Geriatrics Society*. 2014;62(2):342-246. doi: 10.1111/jgs.12635.
- 24 21 42. Knaus WA, Draper EA, Wagner DP, Zimmerman JE. APACHE II: a severity of disease classification  
25 22 system. *Critical Care Medicine*. 1985;13(10):818-29.
- 26 23 43. Zou Y, Cole MG, Primeau FJ, McCusker J, Bellavance F, Laplante J. Detection and diagnosis of  
27 24 delirium in the elderly: psychiatrist diagnosis, confusion assessment method, or consensus diagnosis?  
28 25 *International psychogeriatrics / IPA*. 1998;10(3):303-8. Epub 1998/10/24. PubMed PMID: 9785149.
- 29 26 44. Herr M, Ankri J. A critical review of the use of telephone tests to identify cognitive impairment in  
30 27 epidemiology and clinical research. *Journal of telemedicine and telecare*. 2013;19(1):45-54. Epub  
31 28 2013/02/08. doi: 10.1177/1357633x12474962. PubMed PMID: 23390209.
- 32 29 45. Centre intégré universitaire de santé et de services sociaux de la Capitale-Nationale. Centre  
33 30 d'excellence sur le vieillissement de Québec [May 1 2017]. Available from: [https://www.ciussu-  
34 31 capitalenationale.gouv.qc.ca/expertise-et-partenariat/le-centre-dexcellence-sur-le-vieillissement-de-  
35 32 quebec](https://www.ciussu-capitalenationale.gouv.qc.ca/expertise-et-partenariat/le-centre-dexcellence-sur-le-vieillissement-de-quebec).
- 36 33 46. Inouye S. CAM Training Manual. New Haven, CT: Yale University School of Medicine; 1991.
- 37 34 47. Émond M, Grenier D, Morin J, Eagles D, Boucher V, Le Sage N, et al. Emergency Department stay  
38 35 associated delirium in older patients. *Canadian Geriatrics Journal*. 2017;20(1).
- 39 36 48. Inouye SK, Leo-Summers L, Zhang Y, Bogardus ST, Jr., Leslie DL, Agostini JV. A chart-based  
40 37 method for identification of delirium: validation compared with interviewer ratings using the confusion  
41 38 assessment method. *J Am Geriatr Soc*. 2005;53(2):312-8. PubMed PMID: 15673358.
- 42 39 49. Han JH, Vasilevskis EE, Chandrasekhar R, Liu X, Schnelle JF, Dittus RS, et al. Delirium in the  
43 40 Emergency Department and Its Extension into Hospitalization (DELINEATE) Study: Effect on 6-month  
44 41 Function and Cognition. *The American Geriatrics Society*. 2017;65:1333-8. doi: 10.1111/jgs.14824.
- 45 42 50. Ministère de la Santé et des Services Sociaux. Approche adaptée à la personne âgée en milieu  
46 43 hospitalier - Cadre de référence. 2011.
- 47  
48  
49  
50  
51  
52  
53  
54  
55  
56  
57  
58  
59  
60

## 1 TABLES

2 Table 1. Description of the study population

|                                        | Site 1<br>n(%) | Site 2<br>n(%) | Site 3<br>n(%) | Site 4<br>n(%) | Site comparison p-<br>value | Total       |
|----------------------------------------|----------------|----------------|----------------|----------------|-----------------------------|-------------|
| <b>Age</b>                             |                |                |                |                |                             |             |
| 65-74 y/o                              | 61 (57)        | 21 (32)        | 38 (45)        | 35 (42)        | 0.001                       | 155 (46)    |
| 75-84 y/o                              | 36 (34)        | 23 (35)        | 35 (42)        | 29 (35)        |                             | 123 (36)    |
| ≥85 y/o                                | 9 (9)          | 21 (32)        | 11 (13)        | 19 (23)        |                             | 60 (18)     |
| <b>Sex</b>                             |                |                |                |                |                             |             |
| Female                                 | 53 (50)        | 37 (57)        | 39 (46)        | 44 (53)        | 0.618                       | 173 (51)    |
| <b>CTAS</b>                            |                |                |                |                |                             |             |
| 1 & 2                                  | 39 (37)        | 25 (38)        | 25 (30)        | 18 (22)        | 0.076                       | 107 (31,7)  |
| 3                                      | 47 (44)        | 28 (43)        | 43 (51)        | 37 (45)        |                             | 155 (45,9)  |
| 4 & 5                                  | 20 (19)        | 12 (18)        | 16 (19)        | 28 (34)        |                             | 76 (22,5)   |
| <b>Main reason of admission</b>        |                |                |                |                |                             |             |
| <b>Medical</b>                         |                |                |                |                |                             |             |
| Cardiology                             | 15 (14.0)      | 16 (21.9)      | 23 (25.2)      | 16 (18.0)      |                             | 70 (19.4)   |
| Pneumology                             | 22 (20.6)      | 15 (20.5)      | 26 (28.6)      | 12 (13.5)      |                             | 75 (20.8)   |
| Gastroenterology                       | 13 (12.1)      | 7 (9.6)        | 8 (8.8)        | 17 (19.1)      |                             | 45 (12.5)   |
| Internal medicine                      | 6 (5.6)        | 8 (11.0)       | 7 (7.7)        | 8 (9.0)        |                             | 29 (8.1)    |
| Neurology                              | 13 (12.1)      | 7 (9.6)        | 9 (9.9)        | 10 (11.2)      |                             | 39 (10.8)   |
| Other                                  | 28 (26.2)      | 14 (19.2)      | 14 (15.4)      | 21 (23.6)      |                             | 77 (21.4)   |
| <b>Surgical</b>                        |                |                |                |                |                             |             |
| Orthopedics                            | 2 (1.9)        | 6 (8.2)        | 4 (4.4)        | 5 (5.6)        |                             | 17 (4.7)    |
| General surgery                        | 5 (4.7)        | 0 (0)          | 0 (0)          | 0 (0)          |                             | 5 (1.4)     |
| Other                                  | 3 (2.8)        | 0 (0)          | 0 (0)          | 0 (0)          |                             | 3 (0.8)     |
| <b>Time of admission in the ED</b>     |                |                |                |                |                             |             |
| 0:00-8:00                              | 18 (16.5)      | 12 (16.2)      | 21 (22.1)      | 5 (5.6)        |                             | 56 (15.3)   |
| 8:00-16:00                             | 66 (60.6)      | 34 (46.0)      | 43 (45.3)      | 54 (60.7)      |                             | 197 (53.7)  |
| 16:00-0:00                             | 25 (22.9)      | 28 (37.8)      | 31 (32.6)      | 30 (33.7)      |                             | 114 (31.0)  |
| <b>OARS at baseline (mean ± SD)</b>    | 26.33 ±1.98    | 26.41 ±2.20    | 25.95 ±2.60    | 24.92 ±2.41    | <0.001                      | 25.91 ±2.36 |
| <b>TICS-m at baseline (mean ± SD)*</b> | 30.36 ±5.68    | 31.88 ±4.69    | 29.37 ±5.92    | 26.81 ±6.70    | <0.001                      | 29.53 ±6.08 |
| <b>Charlson (mean ± SD)</b>            | 1.93 ±1.78     | 1.65 ±1.69     | 3.13 ±2.48     | 1.81 ±1.55     | <0.001                      | 2.14 ±1.99  |
| <b>APACHE II (mean ± SD)</b>           | 10.99 ±3.43    | 10.77 ±3.37    | 9.48 ±3.43     | 8.70 ±3.17     | <0.001                      | 10.01 ±3.48 |
| <b>Environmental factors</b>           |                |                |                |                |                             |             |
| Proper lighting <sup>a</sup>           | 65 (63)        | 49 (75)        | 71 (85)        | 18 (22)        | <0.001                      | 203 (61)    |
| <b>Patient hydration</b>               |                |                |                |                |                             |             |
| Fasting                                | 10 (10)        | 8 (12)         | 11 (13)        | 16 (19)        | 0.369                       | 45 (14)     |

|                                                |         |         |         |         |        |          |
|------------------------------------------------|---------|---------|---------|---------|--------|----------|
| Glass of water within reach                    | 70 (72) | 55 (85) | 52 (65) | 71 (86) | 0.005  | 248 (76) |
| Presence of saliva <sup>‡</sup>                | 74 (76) | 52 (80) | 49 (60) | 9 (11)  | <0.001 | 184 (56) |
| Any IV Fluids                                  | 75 (77) | 58 (89) | 78 (95) | 65 (78) | 0.003  | 276 (84) |
| <b>Physical restraints (any)<sup>+</sup></b>   | 78 (77) | 30 (46) | 1 (1)   | 65 (79) | <0.001 | 174 (53) |
| <b>Medical interventions limiting movement</b> |         |         |         |         |        |          |
| Bed rest                                       | 1 (1)   | 1 (2)   | 5 (6)   | 0 (0,0) | 0.071  | 7 (2)    |
| Urinary catheter                               | 7 (8)   | 5 (9)   | 2 (2)   | 2 (3)   | 0.217  | 16 (6)   |
| O2                                             | 15 (17) | 15 (26) | 22 (27) | 4 (6)   | 0.007  | 56 (19)  |
| Saline-lock Catheter or IV drip                | 72 (84) | 53 (91) | 75 (92) | 57 (88) | 0.377  | 257 (88) |
| Other                                          | 10 (12) | 8 (14)  | 18 (22) | 6 (9)   | 0.125  | 42 (14)  |
| <b>Temporal orientation aid<sup>•</sup></b>    | 67 (63) | 45 (69) | 53 (63) | 37 (45) | 0.010  | 202 (60) |

1 \* Adjusted for level of education

2 <sup>a</sup> According to the research assistant

3 <sup>‡</sup> Research assistant had a standardized training to verified if the patients had saliva under their tongue

4 <sup>+</sup> Tablet, bed rails or other

5 <sup>•</sup> Clock, watch, cell phone, calendar

6 CTAS: Canadian Triage Assessment Scale; OARS: Older American's Resources and Services; TICS-m: Telephone  
 7 Interview for Cognitive Status-modified; APACHE II: Acute Physiological and Chronic Health Evaluation  
 8 II; IV: intravenous injection;  
 9

1  
2  
3 **1 FIGURES LEGEND**

4 **2 Figure 1. Study flowchart**

5  
6 **3 Figure 2. Distribution of delirium across participating sites**

7  
8 **4 Figure 3. Cumulative incidence of delirium curve**

9  
10 **5 Figure 4. Adjusted length of ED stay (hours)\***

11  
12 \* Length of stay was adjusted for site, age, Charlson, APACHE, OARS and TICS-m scores. \*\*: **6**  
13 **7** Difference between No delirium and Incident delirium in terms of length of ED stay <0.05

14  
15 **8 Figure 5. Adjusted length of hospital stay (hours)\***

16  
17 \* Length of stay was adjusted for site, age, Charlson, APACHE, OARS and TICS-m scores. \*\*: **9**  
18 **10** Difference between No delirium and Incident delirium in terms of length of ED stay <0.05



1  
2  
3  
4  
5  
6  
7  
8  
9  
10  
11  
12  
13  
14  
15  
16  
17  
18  
19  
20  
21  
22  
23  
24  
25  
26  
27  
28  
29  
30  
31  
32  
33  
34  
35  
36  
37  
38  
39  
40  
41  
42  
43  
44  
45  
46  
47  
48  
49  
50  
51  
52  
53  
54  
55  
56  
57  
58  
59  
60

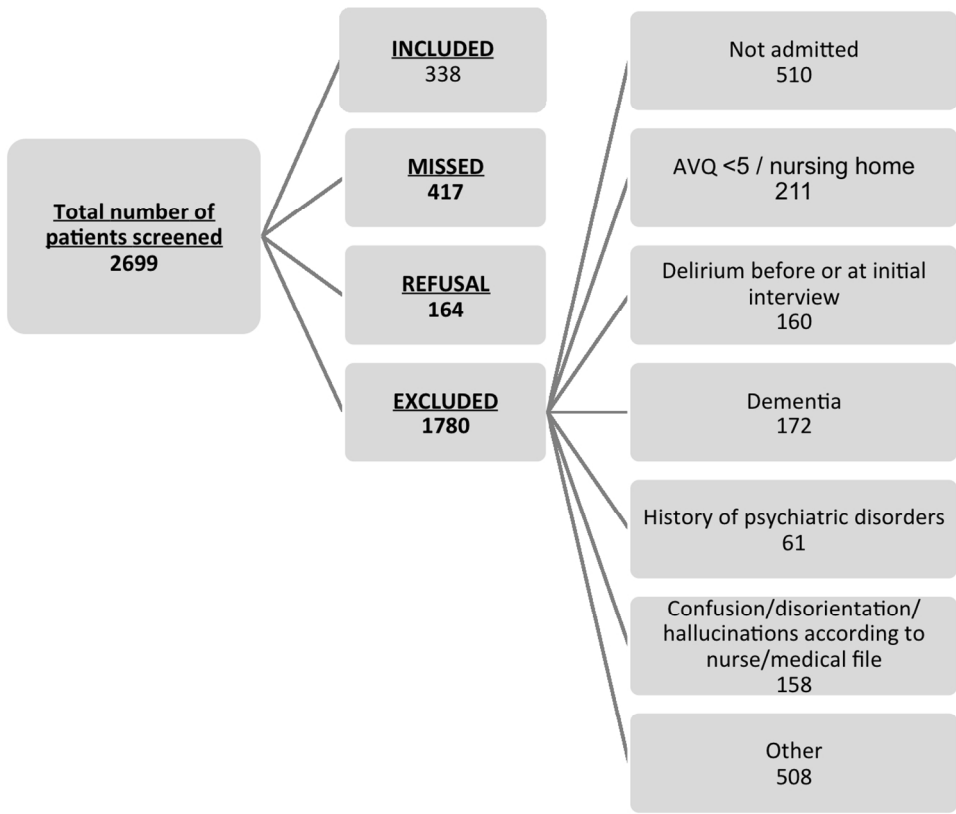

Peer review only

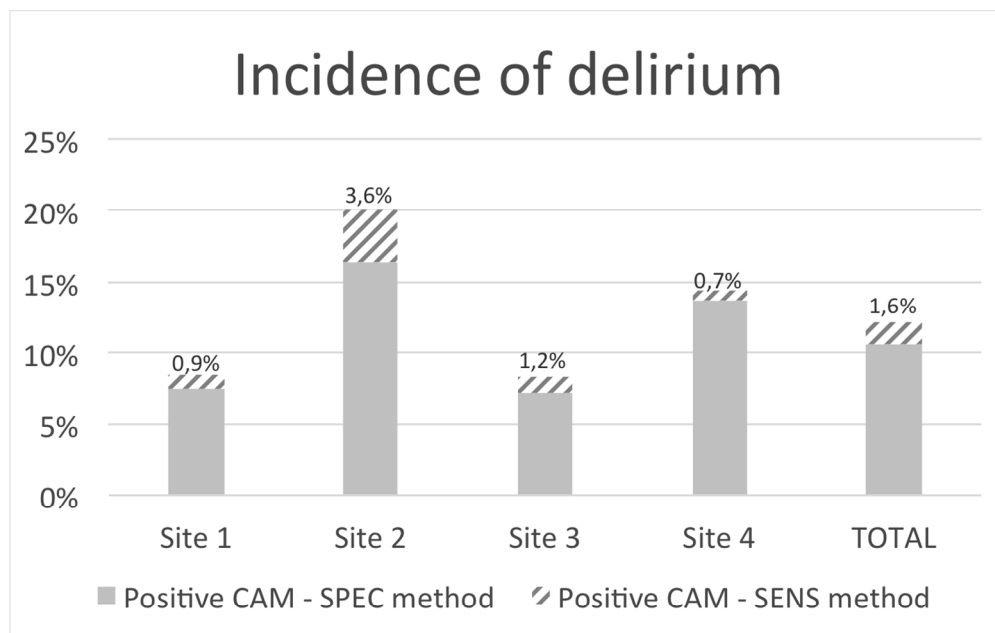

view only

1  
2  
3  
4  
5  
6  
7  
8  
9  
10  
11  
12  
13  
14  
15  
16  
17  
18  
19  
20  
21  
22  
23  
24  
25  
26  
27  
28  
29  
30  
31  
32  
33  
34  
35  
36  
37  
38  
39  
40  
41  
42  
43  
44  
45  
46  
47  
48  
49  
50  
51  
52  
53  
54  
55  
56  
57  
58  
59  
60

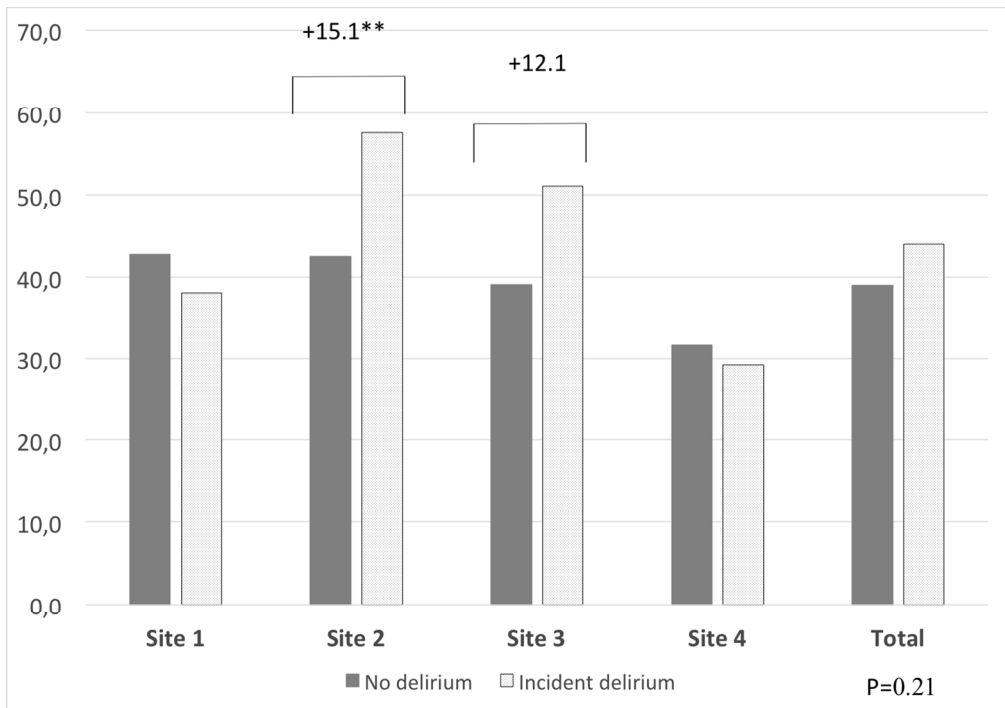

\* Length of stay was adjusted for site, age, Charlson, APACHE, OARS and TICS-m scores. \*\*: Difference between No delirium and Incident delirium in terms of length of ED stay <0.05

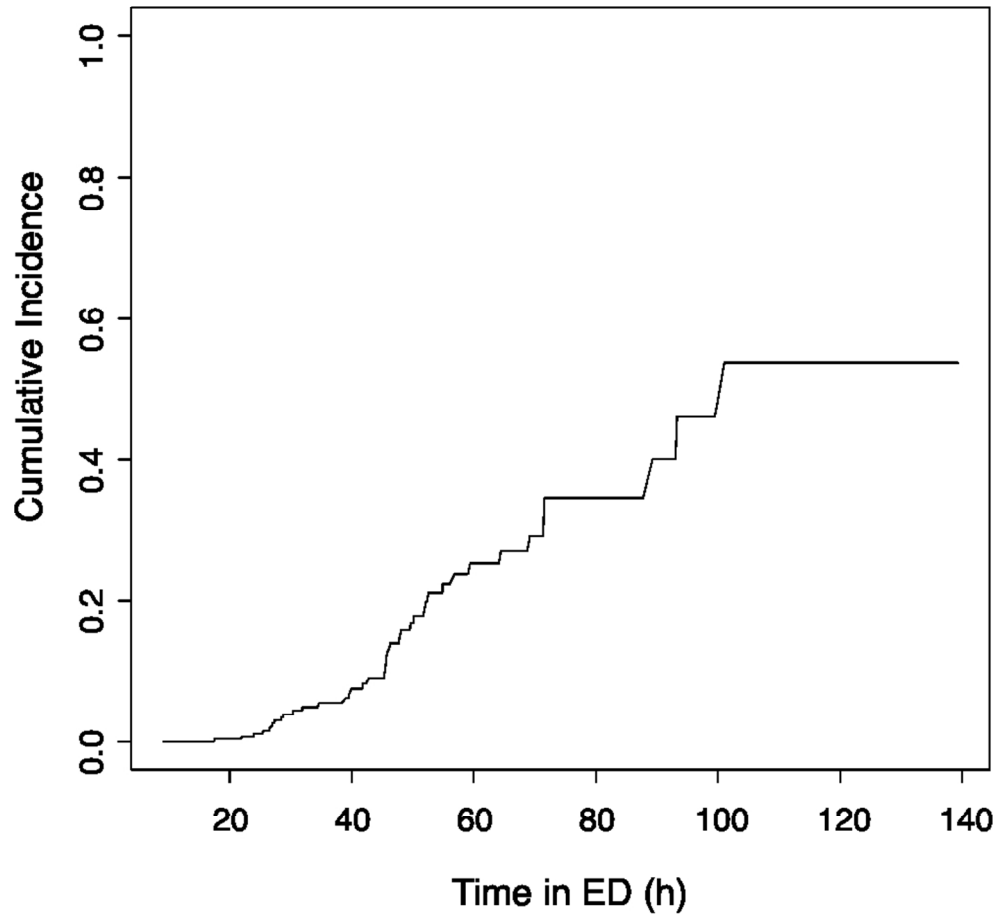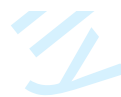

1  
2  
3  
4  
5  
6  
7  
8  
9  
10  
11  
12  
13  
14  
15  
16  
17  
18  
19  
20  
21  
22  
23  
24  
25  
26  
27  
28  
29  
30  
31  
32  
33  
34  
35  
36  
37  
38  
39  
40  
41  
42  
43  
44  
45  
46  
47  
48  
49  
50  
51  
52  
53  
54  
55  
56  
57  
58  
59  
60



\* Length of stay was adjusted for site, age, Charlson, APACHE, OARS and TICS-m scores. \*\*: Difference between No delirium and Incident delirium in terms of length of ED stay <0.05

Review only

**STROBE 2007 (v4) Statement—Checklist of items that should be included in reports of *cohort studies***

| Section/Topic            | Item # | Recommendation                                                                                                                                                                       | Reported on page # |
|--------------------------|--------|--------------------------------------------------------------------------------------------------------------------------------------------------------------------------------------|--------------------|
| Title and abstract       | 1      | (a) Indicate the study's design with a commonly used term in the title or the abstract                                                                                               | 2                  |
|                          |        | (b) Provide in the abstract an informative and balanced summary of what was done and what was found                                                                                  | 2                  |
| <b>Introduction</b>      |        |                                                                                                                                                                                      |                    |
| Background/rationale     | 2      | Explain the scientific background and rationale for the investigation being reported                                                                                                 | 4                  |
| Objectives               | 3      | State specific objectives, including any prespecified hypotheses                                                                                                                     | 5                  |
| <b>Methods</b>           |        |                                                                                                                                                                                      |                    |
| Study design             | 4      | Present key elements of study design early in the paper                                                                                                                              | 6                  |
| Setting                  | 5      | Describe the setting, locations, and relevant dates, including periods of recruitment, exposure, follow-up, and data collection                                                      | 6                  |
| Participants             | 6      | (a) Give the eligibility criteria, and the sources and methods of selection of participants. Describe methods of follow-up                                                           | 6                  |
|                          |        | (b) For matched studies, give matching criteria and number of exposed and unexposed                                                                                                  | N/A                |
| Variables                | 7      | Clearly define all outcomes, exposures, predictors, potential confounders, and effect modifiers. Give diagnostic criteria, if applicable                                             | 7                  |
| Data sources/measurement | 8*     | For each variable of interest, give sources of data and details of methods of assessment (measurement). Describe comparability of assessment methods if there is more than one group | 7-8                |
| Bias                     | 9      | Describe any efforts to address potential sources of bias                                                                                                                            | 7-8                |
| Study size               | 10     | Explain how the study size was arrived at                                                                                                                                            | 9                  |
| Quantitative variables   | 11     | Explain how quantitative variables were handled in the analyses. If applicable, describe which groupings were chosen and why                                                         | 7-8                |
| Statistical methods      | 12     | (a) Describe all statistical methods, including those used to control for confounding                                                                                                | 7-8                |
|                          |        | (b) Describe any methods used to examine subgroups and interactions                                                                                                                  | N/A                |
|                          |        | (c) Explain how missing data were addressed                                                                                                                                          | 9                  |
|                          |        | (d) If applicable, explain how loss to follow-up was addressed                                                                                                                       | N/A                |
|                          |        | (e) Describe any sensitivity analyses                                                                                                                                                | 8                  |
| <b>Results</b>           |        |                                                                                                                                                                                      |                    |

1  
2  
3  
4  
5  
6  
7  
8  
9  
10  
11  
12  
13  
14  
15  
16  
17  
18  
19  
20  
21  
22  
23  
24  
25  
26  
27  
28  
29  
30  
31  
32  
33  
34  
35  
36  
37  
38  
39  
40  
41  
42  
43  
44  
45  
46  
47

|                          |     |                                                                                                                                                                                                              |     |
|--------------------------|-----|--------------------------------------------------------------------------------------------------------------------------------------------------------------------------------------------------------------|-----|
| Participants             | 13* | (a) Report numbers of individuals at each stage of study—eg numbers potentially eligible, examined for eligibility, confirmed eligible, included in the study, completing follow-up, and analysed            | 9   |
|                          |     | (b) Give reasons for non-participation at each stage                                                                                                                                                         | 9   |
|                          |     | (c) Consider use of a flow diagram                                                                                                                                                                           | 9   |
| Descriptive data         | 14* | (a) Give characteristics of study participants (eg demographic, clinical, social) and information on exposures and potential confounders                                                                     | 9   |
|                          |     | (b) Indicate number of participants with missing data for each variable of interest                                                                                                                          | N/A |
|                          |     | (c) Summarise follow-up time (eg, average and total amount)                                                                                                                                                  | N/A |
| Outcome data             | 15* | Report numbers of outcome events or summary measures over time                                                                                                                                               | N/A |
| Main results             | 16  | (a) Give unadjusted estimates and, if applicable, confounder-adjusted estimates and their precision (eg, 95% confidence interval). Make clear which confounders were adjusted for and why they were included | 9   |
|                          |     | (b) Report category boundaries when continuous variables were categorized                                                                                                                                    | N/A |
|                          |     | (c) If relevant, consider translating estimates of relative risk into absolute risk for a meaningful time period                                                                                             | N/A |
| Other analyses           | 17  | Report other analyses done—eg analyses of subgroups and interactions, and sensitivity analyses                                                                                                               | N/A |
| <b>Discussion</b>        |     |                                                                                                                                                                                                              |     |
| Key results              | 18  | Summarise key results with reference to study objectives                                                                                                                                                     | 10  |
| <b>Limitations</b>       |     |                                                                                                                                                                                                              |     |
| Interpretation           | 20  | Give a cautious overall interpretation of results considering objectives, limitations, multiplicity of analyses, results from similar studies, and other relevant evidence                                   | 10  |
| Generalisability         | 21  | Discuss the generalisability (external validity) of the study results                                                                                                                                        | 11  |
| <b>Other information</b> |     |                                                                                                                                                                                                              |     |
| Funding                  | 22  | Give the source of funding and the role of the funders for the present study and, if applicable, for the original study on which the present article is based                                                | 1   |

\*Give information separately for cases and controls in case-control studies and, if applicable, for exposed and unexposed groups in cohort and cross-sectional studies.

**Note:** An Explanation and Elaboration article discusses each checklist item and gives methodological background and published examples of transparent reporting. The STROBE checklist is best used in conjunction with this article (freely available on the Web sites of PLoS Medicine at <http://www.plosmedicine.org/>, Annals of Internal Medicine at <http://www.annals.org/>, and Epidemiology at <http://www.epidem.com/>). Information on the STROBE Initiative is available at [www.strobe-statement.org](http://www.strobe-statement.org).

# BMJ Open

## Incidence of delirium in the Emergency Department and its consequences on hospital length of stay : a prospective observational multicentre cohort study in Canadian EDs

|                               |                                                                                                                                                                                                                                                                                                                                                                                                                                                                                                                                                                                                                                                                                                                                                                                                                                                                                                                                                                                                                                                                                                                                                                                                                                                                                                                                                                                                                                                                                                                                                                                                                                                                                                                                                                                                                                                                                                                                                                                                                                                                                                                                                                                                                                                                                                                                                               |
|-------------------------------|---------------------------------------------------------------------------------------------------------------------------------------------------------------------------------------------------------------------------------------------------------------------------------------------------------------------------------------------------------------------------------------------------------------------------------------------------------------------------------------------------------------------------------------------------------------------------------------------------------------------------------------------------------------------------------------------------------------------------------------------------------------------------------------------------------------------------------------------------------------------------------------------------------------------------------------------------------------------------------------------------------------------------------------------------------------------------------------------------------------------------------------------------------------------------------------------------------------------------------------------------------------------------------------------------------------------------------------------------------------------------------------------------------------------------------------------------------------------------------------------------------------------------------------------------------------------------------------------------------------------------------------------------------------------------------------------------------------------------------------------------------------------------------------------------------------------------------------------------------------------------------------------------------------------------------------------------------------------------------------------------------------------------------------------------------------------------------------------------------------------------------------------------------------------------------------------------------------------------------------------------------------------------------------------------------------------------------------------------------------|
| Journal:                      | <i>BMJ Open</i>                                                                                                                                                                                                                                                                                                                                                                                                                                                                                                                                                                                                                                                                                                                                                                                                                                                                                                                                                                                                                                                                                                                                                                                                                                                                                                                                                                                                                                                                                                                                                                                                                                                                                                                                                                                                                                                                                                                                                                                                                                                                                                                                                                                                                                                                                                                                               |
| Manuscript ID                 | bmjopen-2017-018190.R2                                                                                                                                                                                                                                                                                                                                                                                                                                                                                                                                                                                                                                                                                                                                                                                                                                                                                                                                                                                                                                                                                                                                                                                                                                                                                                                                                                                                                                                                                                                                                                                                                                                                                                                                                                                                                                                                                                                                                                                                                                                                                                                                                                                                                                                                                                                                        |
| Article Type:                 | Research                                                                                                                                                                                                                                                                                                                                                                                                                                                                                                                                                                                                                                                                                                                                                                                                                                                                                                                                                                                                                                                                                                                                                                                                                                                                                                                                                                                                                                                                                                                                                                                                                                                                                                                                                                                                                                                                                                                                                                                                                                                                                                                                                                                                                                                                                                                                                      |
| Date Submitted by the Author: | 24-Nov-2017                                                                                                                                                                                                                                                                                                                                                                                                                                                                                                                                                                                                                                                                                                                                                                                                                                                                                                                                                                                                                                                                                                                                                                                                                                                                                                                                                                                                                                                                                                                                                                                                                                                                                                                                                                                                                                                                                                                                                                                                                                                                                                                                                                                                                                                                                                                                                   |
| Complete List of Authors:     | <p>Emond, Marcel; Université Laval Faculté de médecine, Médecine d'urgence; Centre de recherche du CHU de Québec-Université Laval, Axe Santé des populations et pratiques optimales en santé</p> <p>Boucher, Valérie; Centre de recherche du CHU de Québec-Université Laval, Axe Santé des populations et pratiques optimales en santé; Centre d'excellence sur le vieillissement de Québec</p> <p>Carmichael, Pierre-Hugues; Centre d'excellence sur le vieillissement de Québec</p> <p>Voyer, Philippe; Université Laval Faculté de médecine; Centre de recherche du CHU de Québec-Université Laval, Axe Santé des populations et pratiques optimales en santé</p> <p>Pelletier, Mathieu; Université Laval; 7Centre Intégré de Santé et de Services Sociaux de Lanaudière</p> <p>Gouin, Émilie; Centre Hospitalier Régional de Trois-Rivières</p> <p>Daoust, Raoul; Hôpital Sacré-Coeur de Montréal; Université de Montréal</p> <p>Berthelot, Simon; Centre de recherche du CHU de Québec, Axe Santé des populations et pratiques optimales en santé; CHU de Québec-Université Laval, Médecine d'urgence</p> <p>Lamontagne, Marie-Ève; 6Centre interdisciplinaire de recherche en réadaptation et intégration sociale; Université Laval</p> <p>Morin, Michèle; Université Laval; Centre de recherche du CHU de Québec-Université Laval, Axe Santé des populations et pratiques optimales en santé</p> <p>Lemire, Stéphane; Université Laval; Centre de recherche du CHU de Québec-Université Laval, Axe Santé des populations et pratiques optimales en santé</p> <p>Thien Tuong, Minh Vu; Institut de gériatrie de l'Université de Montréal; 11Centre de recherche du Centre hospitalier de l'Université de Montréal</p> <p>Nadeau, Alexandra; Centre de recherche du CHU de Québec-Université Laval, Axe Santé des populations et pratiques optimales en santé; Centre d'excellence sur le vieillissement de Québec</p> <p>Rheault, Marcel; CSSS de Trois-Rivières</p> <p>Juneau, Lucille; Centre Intégré Universitaire de Services Sociaux et de Santé de la Capitale-Nationale</p> <p>Le Sage, Natalie; Centre de recherche du CHU de Québec-Université Laval, Axe Santé des populations et pratiques optimales en santé; CHU de Québec-Université Laval, Médecine d'urgence</p> <p>Lee, Jacques; University of Toronto, Clinical Epidemiology Unit</p> |
| <b>Primary Subject            | Emergency medicine                                                                                                                                                                                                                                                                                                                                                                                                                                                                                                                                                                                                                                                                                                                                                                                                                                                                                                                                                                                                                                                                                                                                                                                                                                                                                                                                                                                                                                                                                                                                                                                                                                                                                                                                                                                                                                                                                                                                                                                                                                                                                                                                                                                                                                                                                                                                            |



1  
2  
3  
4  
5  
6  
7  
8  
9  
10  
11  
12  
13  
14  
15  
16  
17  
18  
19  
20  
21  
22  
23  
24  
25  
26  
27  
28  
29  
30  
31  
32  
33  
34  
35  
36  
37  
38  
39  
40  
41  
42  
43  
44  
45  
46  
47  
48  
49  
50  
51  
52  
53  
54  
55  
56  
57  
58  
59  
60

|                            |                                                                                        |
|----------------------------|----------------------------------------------------------------------------------------|
| Heading</b>:               |                                                                                        |
| Secondary Subject Heading: | Geriatric medicine                                                                     |
| Keywords:                  | Delirium, Emergency Department, Community seniors, Cognitive status, Functional status |
|                            |                                                                                        |

SCHOLARONE™  
Manuscripts

For peer review only

## 1 Incidence of delirium in the Emergency Department and its consequences on hospital 2 length of stay : a prospective observational multicentre cohort study in Canadian EDs

3 Marcel Émond, MD, MSc<sup>1-2-3-4-5</sup>, Valérie Boucher, BA<sup>1-3-4-6</sup>, Pierre-Hugues Carmichael, MSc<sup>4</sup>, Philippe  
4 Voyer RN, PhD<sup>1-3-4</sup>, Mathieu Pelletier, MD<sup>3-7</sup>, Émilie Gouin, MD<sup>8</sup>, Raoul Daoust, MD MSc<sup>9-10</sup>, Simon  
5 Berthelot, MD, MSc<sup>1-2-3</sup>, Marie-Eve Lamontagne, PhD<sup>3-6</sup>, Michèle Morin, MD, MSc<sup>1-3</sup>, Stéphane Lemire,  
6 MD<sup>1-3-4</sup>, Thien Tuong Minh Vu, MD<sup>11-12-13</sup>, Alexandra Nadeau, MSc<sup>1-3-4-6</sup>, Marcel Rheault<sup>14</sup>, Lucille  
7 Juneau<sup>15</sup>, Natalie Le Sage, PhD<sup>1-2-3</sup>, Jacques Lee, MD MSc,<sup>16-17</sup>

8 <sup>1</sup>Axe Santé des populations et pratiques optimales en santé, Centre de recherche du CHU de Québec-  
9 Université Laval, Québec, Canada; <sup>2</sup>Département de médecine d'urgence, CHU de Québec-Université  
10 Laval; <sup>3</sup>Université Laval, Québec, Canada; <sup>4</sup>Centre d'excellence sur le vieillissement de Québec, Québec,  
11 Canada; <sup>5</sup>Centre de recherche sur les soins et les services de première ligne de l'Université Laval; <sup>6</sup>Centre  
12 interdisciplinaire de recherche en réadaptation et intégration sociale, Québec, Canada; <sup>7</sup>Centre Intégré de  
13 Santé et de Services Sociaux de Lanaudière, Joliette, Canada; <sup>8</sup>Centre Hospitalier Régional de Trois-  
14 Rivières, Trois-Rivières, Canada; <sup>9</sup>Centre de recherche de l'Hôpital du Sacré-Cœur de Montréal,  
15 Montréal, Canada; <sup>10</sup>Université de Montréal, Montréal, Canada; <sup>11</sup>Centre de recherche du Centre  
16 hospitalier de l'Université de Montréal, Montréal, Canada; <sup>12</sup>Centre hospitalier de l'Université de  
17 Montréal; <sup>13</sup>Institut de gériatrie de l'Université de Montréal, Montréal, Canada; <sup>14</sup>CSSS de Trois-Rivières;  
18 <sup>15</sup>Centre Intégré Universitaire de Services Sociaux et de Santé de la Capitale-Nationale; <sup>16</sup>Department of  
19 Family and Community Medicine, University of Toronto, Toronto, Canada; <sup>17</sup>Sunnybrook Health  
20 Sciences center, Toronto, Canada;

21 **Corresponding author:** Marcel Émond MD, MSc, FRCP(C), CHU de Québec - Hôpital de l'Enfant-Jésus,  
22 1401, 18<sup>e</sup> rue, H-608, Québec (Québec) G1J 1Z4, Canada. Phone: (418) 649-0252, ext. 66423, Fax: (418)  
23 649-5832, Email: [marcel.emond@fmed.ulaval.ca](mailto:marcel.emond@fmed.ulaval.ca)

24  
25 3225 words

26  
27 **Authors' contribution:** MÉ had full access to all of the data in the study and takes responsibility for the  
28 integrity of the data and the accuracy of the data analysis. He was responsible of design, funding,  
29 conduct of the study and writing of the manuscript. VB managed the study, led the analyses and wrote  
30 the manuscript. MÉ, VB and PHC were involved in the statistical analysis, and data interpretation. MP,  
31 RD, EG and MEL were responsible for all four site recruitment. PV, SB, MM, TTMV, JL, MR, SL, NLS and LJ  
32 are all collaborator of INDEED project. PHC, MP, RD, EG, MEL, PV, SB, MM, TTMV, AN, JL, MR, SL, NLS  
33 and LJ reviewed, and approve the manuscript.

## 1 ABSTRACT

2 **Objective:** We aim to determine the incidence of delirium and describe its impacts on hospital  
3 length of stay (LOS) among non-delirious community older adults with an 8-hour exposure to  
4 the Emergency Department (ED) environment.

5 **Design:** This is a prospective observational multicentre cohort study (March-July 2015). Patients  
6 were assessed 2x/day during their entire ED stay and up to 24 hours on hospital ward.

7 **Setting:** The study took place in 4 Canadian EDs.

8 **Participants:** 338 included patients: 1) aged  $\geq 65$ ; 2) who had an ED stay  $\geq 8$  hours; 3) were  
9 admitted to hospital ward; 4) were independent/semi-independent.

10 **Main Outcome(s) and Measure(s):** The primary outcomes of this study were incident delirium  
11 in the ED or within 24 h of ward admission and ED and hospital LOS. Functional and cognitive  
12 status were assessed using validated Older Americans' Resources and Services (OARS) and the  
13 Telephone Interview for Cognitive Status- modified (TICS-m) tools. The Confusion Assessment  
14 Method (CAM) was used to detect incident delirium. Univariate and multivariate analyses were  
15 conducted to evaluate outcomes.

16 **Results:** Mean age was 76.8 ( $\pm 8.1$ ), 17.7% were aged  $>85$  years old and 48.8% were male. The  
17 mean incidence of delirium was 12.1% (n=41). Median Interquartile range ED LOS was  
18 32.4 (24.5–47.9) hours and hospital LOS was 146.6 (75.2-267.8) hours. Adjusted mean ED LOS  
19 and mean hospital LOS were increased respectively by 5.0 hours (95% CI [-1.4, 14.1], p=0.06)  
20 and by 105.4 hours (4.4 days) (95% CI: [25.1, 162.0], p< 0.001) for patients who developed an  
21 episode of delirium compared to non-delirious patient.

22 **Conclusions:** An incident delirium was observed in 1 of 8 independent/semi-independent older  
23 adults after an 8-hour ED exposure. An episode of delirium increases hospital LOS by 4 days  
24 and therefore has important implications for patients and could contribute to ED overcrowding  
25 through a deleterious feedback loop.

26

1  
2  
3 1 **Strengths and limitations of this study**  
4

- 5 2 - **Largest prospective study on incident delirium in the Emergency Department.**  
6 3 - **A systematic screening of delirium at study entry was realized with a validated tool.**  
7 4 - **Multiple patient assessments for incident delirium were conducted.**  
8 5 - **Study population was limited to independent/semi-independent elders, which may**  
9 6 **limit external validity of the findings.**  
10 7 - **Hospital LOS were adjusted for potential cofounders relating to geriatric care.**  
11  
12  
13 8

14  
15  
16  
17  
18  
19  
20  
21  
22  
23  
24  
25  
26  
27  
28  
29  
30  
31  
32  
33  
34  
35  
36  
37  
38  
39  
40  
41  
42  
43  
44  
45  
46  
47  
48  
49  
50  
51  
52  
53  
54  
55  
56  
57  
58  
59  
60

For peer review only

## 1 INTRODUCTION

2 In 2016, the youngest of the "baby-boomers" turned 50 years old and people aged 65 and older  
3 represented 18.1% of the population in Quebec.(1) It is foreseen that by 2031, the proportion of  
4 older adults aged over 65 will nearly double, with a major increase among those aged 85 and  
5 older.(2) Over the coming decades, those demographic trends will fundamentally change the  
6 make-up of the population served by Quebec Emergency Departments (ED). Older adults are  
7 already the main users of emergency health care services(3-5) and in 2012-2013, 40% of ED  
8 stretchers were occupied by patients aged over 65.(6) Furthermore, patients over 75 years of age  
9 have the highest ED visit rate of any age group and in 2012-2013 those patients occupied 25% of  
10 ED stretchers.(7, 8) Those numbers will only increase over time as the older adults population  
11 grows and this "Silver Tsunami"(9) will have major consequences on the healthcare of seniors  
12 and on our health care system in general.

13 Caring for older patients in the ED is particularly challenging.(10) Indeed, the time-pressure  
14 environment and high level of background noise may impede efficient communications with  
15 older patients.(11, 12) Moreover, specialized geriatric training for ED health professionals  
16 remains in its infancy(13) and they may not be as equipped as they should be to face the specific  
17 issues of older patients. All of this may contribute to the fact that older adults have higher rates  
18 of unplanned returns to the ED,(14, 15) of hospitalization,(16) falls,(17) loss of  
19 independence(18) and unrecognized delirium(19-21) following an emergency visit. Delirium is  
20 an acute brain dysfunction defined as a mental disorder of acute onset with a fluctuating course,  
21 characterized by a disturbance in consciousness, attention, orientation, memory, thought,  
22 perception and behavior.(22, 23) It is a common problem in the ED and its prevalence in older  
23 patients admitted to acute and long-term care facilities ranges between 9.6% and 89%.(21, 24-  
24 26)

25 In August of 2013, Inouye *et al.* published a systematic review(27) in which they found no study  
26 reporting the incidence of delirium in the ED. The same author also demonstrated that an ED  
27 stay of 12 hours or more was one of the strongest independent predictors of the onset of  
28 subsequent delirium in older patients.(28-30) This is of increasing concern, as recent ED wait  
29 times have become quite significant. Since then, a few prospective studies were conducted in  
30 order to explore the problem of ED-stay associated delirium.(30-32) To our knowledge, there are  
31 few multicenter studies aimed at describing the incidence of delirium in ED of developed  
32 countries, such as Canada. Because the literature regarding the incidence of delirium in the ED  
33 and its potential impacts on hospital length of stay (LOS), functional status and unplanned ED  
34 readmissions is scant, its consequences have yet to be clearly identified in order to orient modern  
35 acute medical care. A study by McCusker *et al.* even found that hospital stay was increased by  
36 7.78 days for patients who developed a delirium (incident delirium) during the first 7 days of  
37 their stay.(33) The onset of such complication in the ED could influence hospital LOS and reflect  
38 back on ED crowding and older adults' use of emergency health services.The present study  
39 focused on the incidence of delirium induced by emergency department stay. Although ED-  
40 induced delirium could be affected by acute illness, comorbidities, ED crowding metrics and  
41 health care providers' ability to provide basic care known to prevent delirium, we hypothesized  
42 that the incidence of new cases of delirium among older ED patients who are admitted to hospital  
43 affects a significant proportion of community older adults, and ED-induced delirium leads to

1  
2  
3 1 longer hospital LOS creating a deleterious feedback loop on ED care and operations (34). The  
4 2 study focused on the incident delirium because, as opposed to prevalent delirium, ED services  
5 3 can act in a way to prevent it.  
6

7 4 The objective of this study was to fill a basic knowledge gap regarding the incidence of delirium  
8 5 and its impacts on hospital LOS for older, community independent/semi-independent, non-  
9 6 delirious ED patients with an 8-hour ED stay who are admitted to a hospital ward.  
10  
11  
12 7  
13  
14  
15  
16  
17  
18  
19  
20  
21  
22  
23  
24  
25  
26  
27  
28  
29  
30  
31  
32  
33  
34  
35  
36  
37  
38  
39  
40  
41  
42  
43  
44  
45  
46  
47  
48  
49  
50  
51  
52  
53  
54  
55  
56  
57  
58  
59  
60

For peer review only

## 1 METHODS

### 2 Study setting and population

3 This prospective multicenter study included patients who presented to one of the 4 participating  
4 Quebec EDs (two university-affiliated level 1 trauma centers and two regional hospitals)  
5 between March and July 2015. **Inclusion criteria** were: 1) Patients aged 65 and over; 2) Patients  
6 with an ED stay of  $\geq 8$  hours; 3) Patients needing and/or waiting for admission to any hospital  
7 ward; 4) Independent or semi-independent patients (able to perform 5/7 activities of daily living  
8 according to the Older Americans Resources and Services scale (OARS)). **Exclusion criteria**  
9 were: 1) Patient with unstable medical condition requiring admission to the psychiatric ward,  
10 intensive or palliative care units; 2) Patient who are unable to consent; 3) Patients who live (or  
11 are in transition) in a long-term care facility; 4) Patients unable to speak French or English;  
12 5) Patients presenting a delirium before coming to the ED, upon arrival or by the end of the first  
13 8 hours in the ED; 6) Patients with a history of psychiatric disorders (such as schizophrenia,  
14 psychotic symptoms and bipolar disorder).

15 Based on soon to be published new recommendations from the Direction Nationale des  
16 Urgences regarding older patients' lengths of ED stay, which should be kept under 8 hours, we  
17 choose an 8-hour exposure for our patients, as opposed to the 12-hour exposure previously  
18 determined to be a predictor of subsequent delirium (28-30). Our pragmatic approach led us to  
19 include patients who need or are awaiting admission to a hospital ward; since, Caplan *et al.*  
20 showed that patients admitted to hospital have a significantly at higher proportion of delirium  
21 than their equivalent counterparts discharged and treated with home resources.(35) Also, even if  
22 we know that delirium is more prevalent in this population, we chose to exclude patients who are  
23 not independent or semi-independent, because we were mainly interested to investigate the  
24 impact of delirium on the most robust older patients. In addition, we chose to exclude patients  
25 who were unable to consent, because assessing initial interview and follow-up with those  
26 patients would have been difficult.

27 Potential participants were identified using the emergency department information system.  
28 Research assistants (RAs) obtained consent and screened the participants for eligibility after their  
29 8-hour exposure to the ED. Sociodemographic, medical and comorbidity data were collected  
30 upon initial interview. RAs also assessed patients' baseline physical, frailty and cognitive status.  
31 Patients were screened for delirium during initial interview, and twice a day (with at least  
32 6 hours between each evaluation) during their entire ED stay and up to 24 hours after being  
33 admitted to a hospital ward. Potential participants were considered as "missed" when they was  
34 no RA on-site for the recruitment. RAs were on site for the screening of patients about 12 hours  
35 a day, 7 days a week.

### 36 Measures

37 Patients' frailty and physical status were assessed using respectively the Clinical Frailty Scale  
38 (CFS) (36) and the Older Americans Resources and Services scale (OARS)(37),while the  
39 Telephone Interview for Cognitive Status-modified (TICS-m),(38) the Confusion Assessment  
40 Method (CAM) (39) and the Delirium Index (40), were used to assess cognitive status. Other

1  
2  
3 1 information on medications, comorbidities (Charlson comorbidity risk index) (41), severity of  
4 2 illness (Acute Physiological and Chronic Health Evaluation II (APACHE II) (42) and ED  
5 3 environment evaluation were collected in addition to sociodemographic data.

7 4 The CAM is the most commonly used tool for the detection of delirium with its sensitivity  
8 5 ranging between 34% and 58% and its specificity between 89% and 94% when performed by a  
9 6 research assistant. However, even if this sensitivity seems low, it has been shown that when the  
10 7 CAM is administered several times during a shift, it is more sensitive than a diagnosis made by a  
11 8 psychiatrist.(43) There are two existing interpretation methods to the CAM scores: the sensitive  
12 9 (SENS) and the specific (SPEC) methods.(44) A patient is diagnosed with delirium according the  
13 10 SPEC method if they: had an acute onset, a fluctuation in any of the items evaluated in the CAM  
14 11 (inattention, disorganized thinking, altered level of consciousness, disorientation, memory,  
15 12 sensory disturbances, psycho-motor activity, sleep disturbances) as well as inattention and either  
16 13 disorganized thinking or altered state of consciousness.(25) A patient has delirium according to  
17 14 the SENS method if they: had either an acute onset or a fluctuation in any of the items evaluated  
18 15 in the CAM, inattention and either disorganized thinking or altered state of consciousness.(25)  
19 16 The SENS method was used to ascertain delirium. Because of the fluctuating nature of delirium,  
20 17 patients were systematically assessed with the CAM and the Delirium Index (a validated tool  
21 18 used to measure the severity of delirium) (40) twice a day during their entire ED stay.  
22 19 Furthermore, the CAM was used over a 24-hour period following transfer to the hospital ward.  
23 20 ED and ward nurses and doctors were blinded to the study's objectives in order to avoid them  
24 21 changing their practice. The TICS-m was used to assess baseline cognitive status of our study  
25 22 participants.(45) ED environmental information, such as presence of proper lighting (according  
26 23 to the RAs), patient's hydration, presence of physical restraints or medical interventions limiting  
27 24 movement at initial interview and presence of a family member or a friend at initial interview  
28 25 was also recorded by RAs. ED LOS was recorded from administrative databases.

35 26 Each site's team of RAs received standardized training by an experienced member of the  
36 27 mentoring team of the *Centre d'Excellence sur le Vieillissement de Québec*(46), who also  
37 28 specializes in the administration of the CAM. They also attended a group training session  
38 29 conducted by the study coordinator and an experienced research nurse and underwent a 5-hour  
39 30 personalized field training. They were also provided with a detailed training manual. Inter-rater  
40 31 reliability was assessed during patient follow-ups at the coordinating site to ensure that the test  
41 32 was administered in a standardized manner.

45 33 In order to be sure that the missed patients were similar to our participants, basic clinical and  
46 34 demographic data were collected on those missed patients. The incidence of delirium was also  
47 35 collected for those patients.

## 49 36 **Outcomes**

51 37 Incident delirium during the patients' ED-stay was the main outcome of this study, hospital LOS  
52 38 was our secondary outcome. Incident delirium was defined by a delirium who occurred either in  
53 39 the ED or in the first 24 hours of the hospital stay. The CAM was administrated during the initial



1  
2  
3 1 interview ensuring that the patient was not already delirious after the first 8 hours of their ED  
4 2 stay.  
5

6 3  
7  
8 4 ED LOS was measured from the date and time of triage up to the date and time when the patients  
9 5 were physically transferred to the hospital ward. Hospital LOS was also measured from ED  
10 6 triage up to the date and time of hospital discharge. ED and hospital LOS were compared  
11 7 between patients with a positive CAM and those with a negative CAM for each site.  
12  
13

## 14 8 **Statistical analyses**

15  
16 9 Descriptive statistics were computed on patient characteristics and measured outcomes.  
17 10 Cumulative incidence rates for delirium were estimated using Kaplan-Meier curves. ED and  
18 11 hospital LOS is compared in patients with and without incident delirium in the various sites  
19 12 using multiple linear regression, adjusting for APACHE, Charlson, OARS, age and TICS-m. Site  
20 13 and its interaction with incident delirium is treated as a fixed factor. TICS-m scores were  
21 14 adjusted for patients' level of education. Kappa statistics were computed to measure inter-rater  
22 15 reliability of the CAM. Based on an alpha of 5%, 138 patients would allow 80% power for an  
23 16 estimated overall incidence proportion of 15 % with 5% precision. Analyses were performed  
24 17 using SAS, version 9.4 (SAS Institute, Inc., Cary, NC).  
25  
26

27 18 The Comité d'éthique du CHU de Québec acted as the centralized research ethics board and  
28 19 approved this study (project # MP-20-2015-2130). Written consent was obtained for each study  
29 20 participant. Patient records/information were anonymized prior to analysis.  
30  
31

32 21  
33  
34  
35  
36  
37  
38  
39  
40  
41  
42  
43  
44  
45  
46  
47  
48  
49  
50  
51  
52  
53  
54  
55  
56  
57  
58  
59  
60

## 1 RESULTS

### 2 Population

3 A total of 2699 patients were screened by research assistants across our 4 sites (figure 1). Of  
4 those, 1780 did not meet our inclusion criteria or had one of our exclusion criteria, 417 were  
5 missed and 164 refused to participate to the study. This leaves us with a sample of 338 patients  
6 (12.5%). Females represented 51.2% of our population and mean age was 76.8 ( $\pm 8.09$ ) (table 1).

7 A sample analysis of patients who were missed revealed that they had a similar profile to that of  
8 those who were included in our study. 54.9% were female, with a mean age of 77.4 ( $\pm 9.4$ ) years  
9 old. The mean Charlson Comorbidity Score was 1.7 ( $\pm 1.7$ ), 36.7% were considered level 1 or 2  
10 on the Canadian Triage Assessment Scale (CTAS) and 38% were level 3. The medical notes  
11 revealed only one case of incident delirium within 24 hours of triage for this group of patients.  
12 Table 1 provides details on sociodemographic and environmental variables.

### 13 Incidence of delirium

14 In our cohort, we found that the overall incidence of delirium was 12.1% (n=41) using the SENS  
15 method, overall incidence and its distribution across sites are provided in figure 2. Fourteen cases  
16 occurred in the ED, while 27 cases occurred on the ward. Our results indicate that the delirium  
17 incidence rate was 2.9 cases per 1000 patient-hours. Figure 3 shows a cumulative incidence of  
18 delirium curve. Median ED LOS before developing a delirium was 45.2 h (38.0-52.5). Inter-rater  
19 agreements were performed at the coordinating site on 12% of the site's participants. A perfect  
20 agreement was obtained regarding the incidence of delirium, and agreement for each of the CAM  
21 items had Kappa ranging between 0.63 and 1.0.

22 Median (IQR) ED LOS was 32.4 (24.5–47.9) hours. When adjusting for site, age, Charlson,  
23 APACHE, OARS and TICS-m scores, a difference of 5.0 hours was found in the average  
24 adjusted ED LOS between individuals who developed a delirium and those who did not (p=0.21)  
25 (see Figure 4). Of note, a statistically significant difference was found for site 2 (p=0.03).  
26 Therefore, patients who developed incident delirium generally had slightly longer exposure to  
27 the ED environment than patients who did not develop the condition.

### 28 Hospital length of stay

29 Median (IQR) hospital LOS was 146.6 (75.2-267.8) hours. On average, adjusted hospital LOS  
30 was 209 hours (8.7 days) for non-delirious participants while patients who were found to have  
31 incident delirium had a 314.4-hour (13.1 days) hospital stay. The hospital LOS for each site are  
32 shown in Figure 5. Mean hospital adjusted LOS was significantly increased by 105.4 hours (4.4  
33 days) in the delirious patients compared to non-delirious patient (p=0.003).

34

## 1 DISCUSSION

2 Our study is, to our knowledge, the first large Canadian prospective study aiming to determine  
3 the incidence of delirium induced by ED stay in older patients and then to analyze its impacts on  
4 the length of in-hospital stay. We found a 12.1% incidence for delirium in our cohort of  
5 338 older patients. Our study determined that there was a statistically significant association  
6 between incident delirium and hospital LOS, which was increased by 4.4 days in patients with  
7 incident delirium. A statistically non-significant increase of 5.0 hours was also found in the  
8 average ED LOS between those 2 groups, but this increase is of clinical importance for patient  
9 care.

10 Our results confirm the clinical importance of incident delirium in acute medicine care. A  
11 previous Canadian retrospective study was conducted by our team(47) using a chart-based  
12 CAM,(48) in which an 18% incidence of delirium was found in 200 patients medical charts. Half  
13 of those patients developed a delirium within 36 hours of arrival to the ED. It was shown  
14 previously that in prevalent delirious older ED patients that delirium is a predictor of prolonged  
15 hospital LOS (31). With our results, we confirm that incident delirium also has such result.  
16 However, contrary to prevalent delirium, it is possible to change the interventions in hospital to  
17 prevent this episode that has been shown to influence hospital LOS and long-term function and  
18 cognition (49).

19 In 2011, the Ministère de la Santé et des Services Sociaux has published its provincial guide  
20 "Approche adaptée à la personne âgée en milieu hospitalier", (50) a senior-friendly initiative  
21 which aimed to better address the in-hospital care of elders. This initiative stresses the  
22 importance of keeping lengths of stay as short as possible for older adults and presents various  
23 methods to prevent delirium. Every hospital in the province has implemented these guidelines at  
24 different levels. However, our results show that over 4 years post-implementation, ED lengths of  
25 stay for older patients are still quite significant in Quebec, increasing their risk of developing  
26 delirium according to previous studies. Our results also clearly confirm the fact that patients with  
27 incident delirium have longer hospital length of stay, making them more at risk for further  
28 complications. We also recorded an important difference in incident delirium across the 4 study  
29 sites, varying from 8.3% to 20%. Although inter-site comparisons were not powered by our  
30 sample size, many factors could have explained this difference. The different level of  
31 implementation of the provincial senior-friendly guidelines at each site could be a possible cause.

32  
33 Our study has some limitations. Our high rate of missed patients is mainly due to logistic  
34 constraints. However, after comparing the socio-demographic characteristics and comorbidities,  
35 we have found no significant difference between patients who were included and those who were  
36 missed. Furthermore, including those missed patients would likely have reinforced our results,  
37 resulting in higher delirium rates and longer ED and hospital LOS. Therefore, we believe the  
38 likelihood of selection bias is low. Our cohort represents only a portion of the older adults  
39 population usually seen in the ED and may not be generalizable to all elders. We have chosen to  
40 exclude patients with moderate to severe dementia, those who lived in long-term nursing homes,  
41 those with pre-existing psychological conditions and patients who had a lesser functional level.  
42 We have made this decision because we were mainly interested to investigate the impact of  
43 delirium on the most robust older patients. The CAM was administered by different research

1 assistants, and therefore this might have underestimated or overestimated the frequency of an  
2 acute onset of a new symptom. Misclassification of delirium may have occurred as we excluded  
3 patient with delirium using a single first initial assessment with CAM, this pragmatic approach  
4 was used to ensure feasibility of the study. This may have introduced an interviewer bias;  
5 however, this situation is not any different from real-life clinical practice. We tried to decrease  
6 this potential bias by providing research assistants with standardized training, which was proven  
7 effective given our good inter-observer agreement. The study coordinator also reviewed every  
8 single research file to ensure completeness.

9 This study aimed at assessing the present situation in our Canadian EDs regarding the incidence  
10 of delirium induced by a prolonged ED-stay in independent and semi-independent older patients.  
11 The high incidence rate and increased hospital LOS are alarming and could have substantial  
12 consequences for the patient and for our health care system in general. Delirium itself is an  
13 economic burden in the United States as it is estimated to 152\$ billion per year.(31)

14 An interesting solution to this issue might be the use of a short triage tool aiming to identify  
15 patients more at risk of developing a delirium during their ED stay. Delaney *et al.* found that  
16 implementing an alert into the EMR system for triage nurses to screen every patient over 65  
17 years old for delirium helped ED nurses better identify 23% of patients as potentially positive for  
18 delirium.(32) However, more research is needed in order to identify an appropriate tool to be  
19 used by triage nurses.

20  
21 **Grant:** This study was funded by the Fond Québécois de Recherche en Santé (FQRS 29307).

22 **Conflicts of interest:** None

23 **Acknowledgements:** We would like to thank all the research assistants who participated in the  
24 recruitment of patients.

25 **Data sharing statement:** Being a prospective observational multicentre study, this project  
26 includes other data results to be solely used by our research team. The data use is guide by a  
27 public funding agency - FQRS

## 1 REFERENCES

1. Gouvernement du Québec - Institut de la statistique du Québec. Le bilan démographique du Québec. 2016.
2. Heffler S, Levitt K, Smith S, Smith C, Cowan C, Lazenby H, et al. Health spending growth up in 1999; Faster growth expected in the future. *Health Affairs*. 1999;20(2):193-203.
3. Data warehouse on trends in health and aging 2002. Available from: [www.cdc.gov/nchs/about/otheract/aging/trenddata.htm](http://www.cdc.gov/nchs/about/otheract/aging/trenddata.htm).
4. Mathews M, Barnsley J. Patients seeking care during acute illness. Why do they not see their regular physicians? *Can Fam Physician*. 2003;49:1498-503. PubMed PMID: 14649989.
5. Hahn B, Lefkowitz D. Annual expenses and sources of payment for health care services:. Rockville, MD: Agency For Health Care Policy and Research, Public Health Service, 1992 14 DHHS Pub. No AHCPR 93-0007.
6. Le Commissaire à la santé et au bien-être (CSBE). Les Urgences au Québec : Évolution de 2003-2004 à 2012-2013. 2014.
7. Burt CW, McCaig LF. Trends in hospital emergency department utilization: United States, 1992-99. *Vital Health Stat* 13. 2001(150):1-34. PubMed PMID: 11577602.
8. McCaig LF, Burt CW. National Hospital Ambulatory Medical Care Survey: 2002 emergency department summary. *Adv Data*. 2004(340):1-34. PubMed PMID: 15068333.
9. Delafuente JC. The silver tsunami is coming: will pharmacy be swept away with the tide? *Am J Pharm Educ*. 2009;73(1):1. PubMed PMID: 19513138; PubMed Central PMCID: PMC2690864.
10. Hwang U, Morrison RS. The geriatric emergency department. *Journal of the American Geriatrics Society*. 2007;55(11):1873-6. Epub 2007/10/06. doi: 10.1111/j.1532-5415.2007.01400.x. PubMed PMID: 17916122.
11. Baraff LJ, Bernstein E, Bradley K, Franken C, Gerson LW, Hannegan SR, et al. Perceptions of emergency care by the elderly: results of multicenter focus group interviews. *Ann Emerg Med*. 1992;21(7):814-8. PubMed PMID: 1610038.
12. Moons P, Arnauts H, Delooz HH. Nursing issues in care for the elderly in the emergency department: an overview of the literature. *Accid Emerg Nurs*. 2003;11(2):112-20. PubMed PMID: 12633630.
13. Hedges JR, Singal BM, Rousseau EW, Sanders AB, Bernstein E, McNamara RM, et al. Geriatric patient emergency visits. Part II: Perceptions of visits by geriatric and younger patients. *Ann Emerg Med*. 1992;21(7):808-13. Epub 1992/07/01. doi: S0196-0644(05)81026-1 [pii]. PubMed PMID: 1610037.
14. Boulton C, Dowd B, McCaffrey D, Boulton L, Hernandez R, Krulwich H. Screening elders for risk of hospital admission. *Journal of the American Geriatrics Society*. 1993;41(8):811-7. PubMed PMID: 8340558.
15. Friedmann PD, Jin L, Karrison TG, Hayley DC, Mulliken R, Walter J, et al. Early revisit, hospitalization, or death among older persons discharged from the ED. *Am J Emerg Med*. 2001;19(2):125-9. PubMed PMID: 11239256.
16. Marcantonio ER, McKean S, Goldfinger M, Kleefield S, Yurkofsky M, Brennan TA. Factors associated with unplanned hospital readmission among patients 65 years of age and older in a Medicare managed care plan. *Am J Med*. 1999;107(1):13-7. PubMed PMID: 10403347.
17. Speechley M, Tinetti M. Falls and injuries in frail and vigorous community elderly persons. *Journal of the American Geriatrics Society*. 1991;39(1):46-52. PubMed PMID: 1987256.
18. Aminzadeh F, Dalziel WB. Older adults in the emergency department: a systematic review of patterns of use, adverse outcomes, and effectiveness of interventions. *Ann Emerg Med*. 2002;39(3):238-47. PubMed PMID: 11867975.

19. Hustey FM, Meldon SW. The prevalence and documentation of impaired mental status in elderly emergency department patients. *Ann Emerg Med.* 2002;39(3):248-53. PubMed PMID: 11867976.
20. Han JH, Zimmerman EE, Cutler N, Schnelle J, Morandi A, Dittus RS, et al. Delirium in older emergency department patients: recognition, risk factors, and psychomotor subtypes. *Acad Emerg Med.* 2009;16(3):193-200. Epub 2009/01/22. doi: 10.1111/j.1553-2712.2008.00339.x. PubMed PMID: 19154565; PubMed Central PMCID: PMCPMC5015887.
21. Elie M, Rousseau F, Cole M, Primeau F, McCusker J, Bellavance F. Prevalence and detection of delirium in elderly emergency department patients. *CMAJ.* 2000;163(8):977-81. Epub 2000/11/09. PubMed PMID: 11068569; PubMed Central PMCID: PMC80546.
22. Cole MG. Delirium in elderly patients. *Am J Geriatr Psychiatry.* 2004;12(1):7-21. PubMed PMID: 14729554.
23. Han JH, Wilber ST. Altered mental status in older patients in the emergency department. *Clin Geriatr Med.* 2013;29(1):101-36. Epub 2012/11/28. doi: 10.1016/j.cger.2012.09.005. PubMed PMID: 23177603; PubMed Central PMCID: PMCPMC3614410.
24. Fick DM, Agostini JV, Inouye SK. Delirium superimposed on dementia: a systematic review. *Journal of the American Geriatrics Society.* 2002;50(10):1723-32. PubMed PMID: 12366629.
25. Lemiengre J, Nelis J, Joosten E, Braes T, Foreman M, Gastmans C, et al. Detection of delirium by bedside nurses using the confusion assessment method. *Journal of the American Geriatrics Society.* 2006;54(4):685-9. Epub 2006/05/12. doi: 10.1111/j.1532-5415.2006.00667.x. PubMed PMID: 16686883.
26. Voyer P, Richard S, Doucet L, Carmichael PH. Detecting delirium and subsyndromal delirium using different diagnostic criteria among demented long-term care residents. *J Am Med Dir Assoc.* 2009;10(3):181-8. PubMed PMID: 19233058.
27. Inouye SK, Westendorp RG, Saczynski JS. Delirium in elderly people. *Lancet.* 2014;383(9920):911-22. Epub 2013/09/03. doi: S0140-6736(13)60688-1 [pii] 10.1016/S0140-6736(13)60688-1. PubMed PMID: 23992774.
28. Inouye SK, Viscoli CM, Horwitz RI, Hurst LD, Tinetti ME. A predictive model for delirium in hospitalized elderly medical patients based on admission characteristics. *Ann Intern Med.* 1993;119(6):474-81. PubMed PMID: 8357112.
29. Inouye SK, Charpentier PA. Precipitating factors for delirium in hospitalized elderly persons. Predictive model and interrelationship with baseline vulnerability. *Jama.* 1996;275(11):852-7. PubMed PMID: 8596223.
30. Bo M, Bonetto M, Bottignole G, Porrino P, Coppo E, Tibaldi M, et al. Length of Stay in the Emergency Department and Occurrence of Delirium in Older Medical Patients. *Journal of the American Geriatrics Society.* 2016;64(5):1114-9. Epub 2016/05/11. doi: 10.1111/jgs.14103. PubMed PMID: 27160482.
31. Han JH, Eden S, Shintani A, Morandi A, Schnelle J, Dittus RS, et al. Delirium in older emergency department patients is an independent predictor of hospital length of stay. *Acad Emerg Med.* 2011;18(5):451-7. Epub 2011/04/28. doi: 10.1111/j.1553-2712.2011.01065.x. PubMed PMID: 21521405; PubMed Central PMCID: PMCPMC3768130.
32. Delaney M, Pepin J, Somes J. Emergency Department Delirium Screening Improves Care and Reduces Revisits for the Older Adult Patient. *J Emerg Nurs.* 2015;41(6):521-4. Epub 2015/09/28. doi: 10.1016/j.jen.2015.08.013. PubMed PMID: 26409656.
33. McCusker J, Cole MG, Dendukuri N, Belzile E. Does delirium increase hospital stay? *Journal of the American Geriatrics Society.* 2003;51(11):1539-46. Epub 2003/12/23. PubMed PMID: 14687382.
34. Forster AJ, Stiell I, Wells G, Lee AJ, van Wieringen C. The effect of hospital occupancy on emergency department length of stay and patient disposition. *Academic Emergency Medicine.* 2003;10:127-33.

- 1  
2  
3 1 35. Caplan GA, Coconis J, Woods J. Effect of hospital in the home treatment on physical and  
4 2 cognitive function: a randomized controlled trial. *J Gerontol A Biol Sci Med Sci*. 2005;60(8):1035-8. Epub  
5 3 2005/08/30. doi: 60/8/1035 [pii]. PubMed PMID: 16127109.
- 6 4 36. Rockwood K, Song X, MacKnight C, Bergman H, Hogan DB, McDowell I, et al. A global clinical  
7 5 measure of fitness and frailty in elderly people. *CMAJ*. 2005;173(5):489-95. Epub 2005/09/01. doi:  
8 6 173/5/489 [pii]  
9  
10 7 10.1503/cmaj.050051. PubMed PMID: 16129869; PubMed Central PMCID: PMC1188185.
- 11 8 37. Fillenbaum GG, Duke U. Multidimensional functional assessment of older adults: the Duke Older  
12 9 Americans Resources and Services procedures. Hillsdale, NJ: L. Erlbaum Associates; 1988. xii, 179 p. p.
- 13 10 38. de Jager C, Budge M, Clarke R. Utility of TICS-M for the assessment of cognitive function in older  
14 11 adults. *Int J Geriatr Psychiatry*. 2003;18(4):318-24.
- 15 12 39. Inouye SK, van Dyck CH, Alessi CA, Balkin S, Siegel AP, Horwitz RI. Clarifying confusion: the  
16 13 confusion assessment method. A new method for detection of delirium. *Ann Intern Med*.  
17 14 1990;113(12):941-8. PubMed PMID: 2240918.
- 18 15 40. McCusker J, Cole MG, Dendukuri N, Belzile E. The delirium index, a measure of the severity of  
19 16 delirium: new findings on reliability, validity, and responsiveness. *Journal of the American Geriatrics*  
20 17 *Society*. 2004;52(10):1744-9. Epub 2004/09/29. doi: 10.1111/j.1532-5415.2004.52471.x. PubMed PMID:  
21 18 15450055.
- 22 19 41. Frenkel WJ, Jongerius EJ, Mandies-van Uiter MJ, van Munster BC, De Rooij SE. Validation of the  
23 20 Charlson comorbidity index in acutely hospitalized elderly adults: a prospective cohort study. *Journal of*  
24 21 *the American Geriatrics Society*. 2014;62(2):342-246. doi: 10.1111/jgs.12635.
- 25 22 42. Knaus WA, Draper EA, Wagner DP, Zimmerman JE. APACHE II: a severity of disease classification  
26 23 system. *Critical Care Medicine*. 1985;13(10):818-29.
- 27 24 43. Zou Y, Cole MG, Primeau FJ, McCusker J, Bellavance F, Laplante J. Detection and diagnosis of  
28 25 delirium in the elderly: psychiatrist diagnosis, confusion assessment method, or consensus diagnosis? *Int*  
29 26 *Psychogeriatr*. 1998;10(3):303-8. Epub 1998/10/24. PubMed PMID: 9785149.
- 30 27 44. Inouye S. *CAM Training Manual*. New Haven, CT: Yale University School of Medicine; 1991.
- 31 28 45. Herr M, Ankri J. A critical review of the use of telephone tests to identify cognitive impairment in  
32 29 epidemiology and clinical research. *J Telemed Telecare*. 2013;19(1):45-54. Epub 2013/02/08. doi:  
33 30 10.1177/1357633x12474962. PubMed PMID: 23390209.
- 34 31 46. Centre intégré universitaire de santé et de services sociaux de la Capitale-Nationale. Centre  
35 32 d'excellence sur le vieillissement de Québec [May 1 2017]. Available from: [https://www.ciusss-](https://www.ciusss-capitalenationale.gouv.qc.ca/expertise-et-partenariat/le-centre-dexcellence-sur-le-vieillissement-de-quebec)  
36 33 [capitalenationale.gouv.qc.ca/expertise-et-partenariat/le-centre-dexcellence-sur-le-vieillissement-de-](https://www.ciusss-capitalenationale.gouv.qc.ca/expertise-et-partenariat/le-centre-dexcellence-sur-le-vieillissement-de-quebec)  
37 34 [quebec](https://www.ciusss-capitalenationale.gouv.qc.ca/expertise-et-partenariat/le-centre-dexcellence-sur-le-vieillissement-de-quebec).
- 38 35 47. Émond M, Grenier D, Morin J, Eagles D, Boucher V, Le Sage N, et al. Emergency Department stay  
39 36 associated delirium in older patients. *Canadian Geriatrics Journal*. 2017;20(1).
- 40 37 48. Inouye SK, Leo-Summers L, Zhang Y, Bogardus ST, Jr., Leslie DL, Agostini JV. A chart-based  
41 38 method for identification of delirium: validation compared with interviewer ratings using the confusion  
42 39 assessment method. *Journal of the American Geriatrics Society*. 2005;53(2):312-8. PubMed PMID:  
43 40 15673358.
- 44 41 49. Han JH, Vasilevskis EE, Chandrasekhar R, Liu X, Schnelle JF, Dittus RS, et al. Delirium in the  
45 42 Emergency Department and Its Extension into Hospitalization (DELINTEATE) Study: Effect on 6-month  
46 43 Function and Cognition. *The American Geriatrics Society*. 2017;65:1333-8. doi: 10.1111/jgs.14824.
- 47 44 50. Ministère de la Santé et des Services Sociaux. Approche adaptée à la personne âgée en milieu  
48 45 hospitalier - Cadre de référence. 2011.
- 49  
50  
51  
52  
53  
54  
55 46  
56  
57 47  
58  
59  
60

## 1 TABLES

2 Table 1. Description of the study population

|                                    | Site 1<br>n(%) | Site 2<br>n(%) | Site 3<br>n(%) | Site 4<br>n(%) | Site comparison<br>p-value | Total       |
|------------------------------------|----------------|----------------|----------------|----------------|----------------------------|-------------|
| <b>Age</b>                         |                |                |                |                |                            |             |
| 65-74 y/o                          | 61 (57)        | 21 (32)        | 38 (45)        | 35 (42)        | 0.001                      | 155 (46)    |
| 75-84 y/o                          | 36 (34)        | 23 (35)        | 35 (42)        | 29 (35)        |                            | 123 (36)    |
| ≥85 y/o                            | 9 (9)          | 21 (32)        | 11 (13)        | 19 (23)        |                            | 60 (18)     |
| <b>Sex</b>                         |                |                |                |                |                            |             |
| Female                             | 53 (50)        | 37 (57)        | 39 (46)        | 44 (53)        | 0.618                      | 173 (51)    |
| <b>Home alone</b>                  |                |                |                |                |                            |             |
| <b>CTAS</b>                        |                |                |                |                |                            |             |
| 1 & 2                              | 39 (37)        | 25 (38)        | 25 (30)        | 18 (22)        | 0.076                      | 107 (31,7)  |
| 3                                  | 47 (44)        | 28 (43)        | 43 (51)        | 37 (45)        |                            | 155 (45,9)  |
| 4 & 5                              | 20 (19)        | 12 (18)        | 16 (19)        | 28 (34)        |                            | 76 (22,5)   |
| <b>Admission diagnostic</b>        |                |                |                |                |                            |             |
| <b>Medical</b>                     |                |                |                |                |                            |             |
| Cardiology                         | 15 (14.0)      | 16 (21.9)      | 23 (25.2)      | 16 (18.0)      |                            | 70 (19.4)   |
| Pneumology                         | 22 (20.6)      | 15 (20.5)      | 26 (28.6)      | 12 (13.5)      |                            | 75 (20.8)   |
| Gastroenterology                   | 13 (12.1)      | 7 (9.6)        | 8 (8.8)        | 17 (19.1)      |                            | 45 (12.5)   |
| Internal medicine                  | 6 (5.6)        | 8 (11.0)       | 7 (7.7)        | 8 (9.0)        |                            | 29 (8.1)    |
| Neurology                          | 13 (12.1)      | 7 (9.6)        | 9 (9.9)        | 10 (11.2)      |                            | 39 (10.8)   |
| Other                              | 28 (26.2)      | 14 (19.2)      | 14 (15.4)      | 21 (23.6)      |                            | 77 (21.4)   |
| <b>Surgical</b>                    |                |                |                |                |                            |             |
| Orthopedics                        | 2 (1.9)        | 6 (8.2)        | 4 (4.4)        | 5 (5.6)        |                            | 17 (4.7)    |
| General surgery                    | 5 (4.7)        | 0 (0)          | 0 (0)          | 0 (0)          |                            | 5 (1.4)     |
| Other                              | 3 (2.8)        | 0 (0)          | 0 (0)          | 0 (0)          |                            | 3 (0.8)     |
| <b>Time of day of presentation</b> |                |                |                |                |                            |             |
| 0:00-8:00                          | 18 (16.5)      | 12 (16.2)      | 21 (22.1)      | 5 (5.6)        |                            | 56 (15.3)   |
| 8:00-16:00                         | 66 (60.6)      | 34 (46.0)      | 43 (45.3)      | 54 (60.7)      |                            | 197 (53.7)  |
| 16:00-0:00                         | 25 (22.9)      | 28 (37.8)      | 31 (32.6)      | 30 (33.7)      |                            | 114 (31.0)  |
| OARS at baseline (mean ± SD)       | 26.33 ±1.98    | 26.41 ±2.20    | 25.95 ±2.60    | 24.92 ±2.41    | <0.001                     | 25.91 ±2.36 |
| TICS-m at baseline (mean ± SD)*    | 30.36 ±5.68    | 31.88 ±4.69    | 29.37 ±5.92    | 26.81 ±6.70    | <0.001                     | 29.53 ±6.08 |
| Charlson (mean ± SD)               | 1.93 ±1.78     | 1.65 ±1.69     | 3.13 ±2.48     | 1.81 ±1.55     | <0.001                     | 2.14 ±1.99  |
| APACHE II (mean ± SD)              | 10.99 ±3.43    | 10.77 ±3.37    | 9.48 ±3.43     | 8.70 ±3.17     | <0.001                     | 10.01 ±3.48 |
| <b>Environmental factors</b>       |                |                |                |                |                            |             |
| Proper lighting <sup>a</sup>       | 65 (63)        | 49 (75)        | 71 (85)        | 18 (22)        | <0.001                     | 203 (61)    |
| <b>Patient hydration</b>           |                |                |                |                |                            |             |



|                                                |         |         |         |         |        |          |
|------------------------------------------------|---------|---------|---------|---------|--------|----------|
| Fasting                                        | 10 (10) | 8 (12)  | 11 (13) | 16 (19) | 0.369  | 45 (14)  |
| Glass of water within reach                    | 70 (72) | 55 (85) | 52 (65) | 71 (86) | 0.005  | 248 (76) |
| Presence of saliva <sup>‡</sup>                | 74 (76) | 52 (80) | 49 (60) | 9 (11)  | <0.001 | 184 (56) |
| Any IV Fluids                                  | 75 (77) | 58 (89) | 78 (95) | 65 (78) | 0.003  | 276 (84) |
| <b>Physical restraints (any)<sup>+</sup></b>   | 78 (77) | 30 (46) | 1 (1)   | 65 (79) | <0.001 | 174 (53) |
| <b>Medical interventions limiting movement</b> |         |         |         |         |        |          |
| Bed rest                                       | 1 (1)   | 1 (2)   | 5 (6)   | 0 (0,0) | 0.071  | 7 (2)    |
| Urinary catheter                               | 7 (8)   | 5 (9)   | 2 (2)   | 2 (3)   | 0.217  | 16 (6)   |
| O2                                             | 15 (17) | 15 (26) | 22 (27) | 4 (6)   | 0.007  | 56 (19)  |
| Saline-lock Catheter or IV drip                | 72 (84) | 53 (91) | 75 (92) | 57 (88) | 0.377  | 257 (88) |
| Other                                          | 10 (12) | 8 (14)  | 18 (22) | 6 (9)   | 0.125  | 42 (14)  |
| <b>Temporal orientation aid<sup>*</sup></b>    | 67 (63) | 45 (69) | 53 (63) | 37 (45) | 0.010  | 202 (60) |

1 \* Adjusted for level of education

2 <sup>a</sup> According to the research assistant

3 <sup>‡</sup> Research assistant verified if the patients had saliva under their tongue

4 <sup>+</sup> Tablet, bed rails or other

5 <sup>\*</sup> Clock, watch, cell phone, calendar

6 CTAS: Canadian Triage Assessment Scale; OARS: Older American's Resources and Services; TICS-m: Telephone  
 7 Interview for Cognitive Status-modified; APACHE II: Acute Physiological and Chronic Health Evaluation  
 8 II; IV: intravenous injection;

9

1  
2  
3 **1 FIGURES LEGEND**

4 **2 Figure 1. Study flowchart**

5  
6 **3 Figure 2. Distribution of delirium across participating sites**

7  
8 **4 Figure 3. Cumulative incidence of delirium curve**

9  
10 **5 Figure 4. Adjusted length of ED stay (hours)\***

11  
12 \* Length of stay was adjusted for site, age, Charlson, APACHE, OARS and TICS-m scores. \*\*: **6**  
13 **7** Difference between No delirium and Incident delirium in terms of length of ED stay <0.05

14  
15 **8 Figure 5. Adjusted length of hospital stay (hours)\***

16  
17 \* Length of stay was adjusted for site, age, Charlson, APACHE, OARS and TICS-m scores. \*\*: **9**  
18 **10** Difference between No delirium and Incident delirium in terms of length of ED stay <0.05

1  
2  
3  
4  
5  
6  
7  
8  
9  
10  
11  
12  
13  
14  
15  
16  
17  
18  
19  
20  
21  
22  
23  
24  
25  
26  
27  
28  
29  
30  
31  
32  
33  
34  
35  
36  
37  
38  
39  
40  
41  
42  
43  
44  
45  
46  
47  
48  
49  
50  
51  
52  
53  
54  
55  
56  
57  
58  
59  
60



Peer review only



view only

1  
2  
3  
4  
5  
6  
7  
8  
9  
10  
11  
12  
13  
14  
15  
16  
17  
18  
19  
20  
21  
22  
23  
24  
25  
26  
27  
28  
29  
30  
31  
32  
33  
34  
35  
36  
37  
38  
39  
40  
41  
42  
43  
44  
45  
46  
47  
48  
49  
50  
51  
52  
53  
54  
55  
56  
57  
58  
59  
60





\* Length of stay was adjusted for site, age, Charlson, APACHE, OARS and TICS-m scores. \*\*: Difference between No delirium and Incident delirium in terms of length of ED stay <0.05

view only

1  
2  
3  
4  
5  
6  
7  
8  
9  
10  
11  
12  
13  
14  
15  
16  
17  
18  
19  
20  
21  
22  
23  
24  
25  
26  
27  
28  
29  
30  
31  
32  
33  
34  
35  
36  
37  
38  
39  
40  
41  
42  
43  
44  
45  
46  
47  
48  
49  
50  
51  
52  
53  
54  
55  
56  
57  
58  
59  
60



\* Length of stay was adjusted for site, age, Charlson, APACHE, OARS and TICS-m scores. \*\*: Difference between No delirium and Incident delirium in terms of length of ED stay <0.05

Review only

**STROBE 2007 (v4) Statement—Checklist of items that should be included in reports of *cohort studies***

| Section/Topic                | Item # | Recommendation                                                                                                                                                                       | Reported on page # |
|------------------------------|--------|--------------------------------------------------------------------------------------------------------------------------------------------------------------------------------------|--------------------|
| Title and abstract           | 1      | (a) Indicate the study's design with a commonly used term in the title or the abstract                                                                                               | 2                  |
|                              |        | (b) Provide in the abstract an informative and balanced summary of what was done and what was found                                                                                  | 2                  |
| <b>Introduction</b>          |        |                                                                                                                                                                                      |                    |
| Background/rationale         | 2      | Explain the scientific background and rationale for the investigation being reported                                                                                                 | 4                  |
| Objectives                   | 3      | State specific objectives, including any prespecified hypotheses                                                                                                                     | 5                  |
| <b>Methods</b>               |        |                                                                                                                                                                                      |                    |
| Study design                 | 4      | Present key elements of study design early in the paper                                                                                                                              | 6                  |
| Setting                      | 5      | Describe the setting, locations, and relevant dates, including periods of recruitment, exposure, follow-up, and data collection                                                      | 6                  |
| Participants                 | 6      | (a) Give the eligibility criteria, and the sources and methods of selection of participants. Describe methods of follow-up                                                           | 6                  |
|                              |        | (b) For matched studies, give matching criteria and number of exposed and unexposed                                                                                                  | N/A                |
| Variables                    | 7      | Clearly define all outcomes, exposures, predictors, potential confounders, and effect modifiers. Give diagnostic criteria, if applicable                                             | 7                  |
| Data sources/<br>measurement | 8*     | For each variable of interest, give sources of data and details of methods of assessment (measurement). Describe comparability of assessment methods if there is more than one group | 7-8                |
| Bias                         | 9      | Describe any efforts to address potential sources of bias                                                                                                                            | 7-8                |
| Study size                   | 10     | Explain how the study size was arrived at                                                                                                                                            | 9                  |
| Quantitative variables       | 11     | Explain how quantitative variables were handled in the analyses. If applicable, describe which groupings were chosen and why                                                         | 7-8                |
| Statistical methods          | 12     | (a) Describe all statistical methods, including those used to control for confounding                                                                                                | 7-8                |
|                              |        | (b) Describe any methods used to examine subgroups and interactions                                                                                                                  | N/A                |
|                              |        | (c) Explain how missing data were addressed                                                                                                                                          | 9                  |
|                              |        | (d) If applicable, explain how loss to follow-up was addressed                                                                                                                       | N/A                |
|                              |        | (e) Describe any sensitivity analyses                                                                                                                                                | 8                  |
| <b>Results</b>               |        |                                                                                                                                                                                      |                    |



|                          |     |                                                                                                                                                                                                              |     |
|--------------------------|-----|--------------------------------------------------------------------------------------------------------------------------------------------------------------------------------------------------------------|-----|
| Participants             | 13* | (a) Report numbers of individuals at each stage of study—eg numbers potentially eligible, examined for eligibility, confirmed eligible, included in the study, completing follow-up, and analysed            | 9   |
|                          |     | (b) Give reasons for non-participation at each stage                                                                                                                                                         | 9   |
|                          |     | (c) Consider use of a flow diagram                                                                                                                                                                           | 9   |
| Descriptive data         | 14* | (a) Give characteristics of study participants (eg demographic, clinical, social) and information on exposures and potential confounders                                                                     | 9   |
|                          |     | (b) Indicate number of participants with missing data for each variable of interest                                                                                                                          | N/A |
|                          |     | (c) Summarise follow-up time (eg, average and total amount)                                                                                                                                                  | N/A |
| Outcome data             | 15* | Report numbers of outcome events or summary measures over time                                                                                                                                               | N/A |
| Main results             | 16  | (a) Give unadjusted estimates and, if applicable, confounder-adjusted estimates and their precision (eg, 95% confidence interval). Make clear which confounders were adjusted for and why they were included | 9   |
|                          |     | (b) Report category boundaries when continuous variables were categorized                                                                                                                                    | N/A |
|                          |     | (c) If relevant, consider translating estimates of relative risk into absolute risk for a meaningful time period                                                                                             | N/A |
| Other analyses           | 17  | Report other analyses done—eg analyses of subgroups and interactions, and sensitivity analyses                                                                                                               | N/A |
| <b>Discussion</b>        |     |                                                                                                                                                                                                              |     |
| Key results              | 18  | Summarise key results with reference to study objectives                                                                                                                                                     | 10  |
| <b>Limitations</b>       |     |                                                                                                                                                                                                              |     |
| Interpretation           | 20  | Give a cautious overall interpretation of results considering objectives, limitations, multiplicity of analyses, results from similar studies, and other relevant evidence                                   | 10  |
| Generalisability         | 21  | Discuss the generalisability (external validity) of the study results                                                                                                                                        | 11  |
| <b>Other information</b> |     |                                                                                                                                                                                                              |     |
| Funding                  | 22  | Give the source of funding and the role of the funders for the present study and, if applicable, for the original study on which the present article is based                                                | 1   |

\*Give information separately for cases and controls in case-control studies and, if applicable, for exposed and unexposed groups in cohort and cross-sectional studies.

**Note:** An Explanation and Elaboration article discusses each checklist item and gives methodological background and published examples of transparent reporting. The STROBE checklist is best used in conjunction with this article (freely available on the Web sites of PLoS Medicine at <http://www.plosmedicine.org/>, Annals of Internal Medicine at <http://www.annals.org/>, and Epidemiology at <http://www.epidem.com/>). Information on the STROBE Initiative is available at [www.strobe-statement.org](http://www.strobe-statement.org).

# BMJ Open

## Incidence of delirium in the Canadian Emergency Department and its consequences on hospital length of stay : a prospective observational multicentre cohort study

|                               |                                                                                                                                                                                                                                                                                                                                                                                                                                                                                                                                                                                                                                                                                                                                                                                                                                                                                                                                                                                                                                                                                                                                                                                                                                                                                                                                                                                                                                                                                                                                                                                                                                                                                                                                                                                                                                                                                                                                                                                                                                                                                                                                                                                                                                                                                                                                                               |
|-------------------------------|---------------------------------------------------------------------------------------------------------------------------------------------------------------------------------------------------------------------------------------------------------------------------------------------------------------------------------------------------------------------------------------------------------------------------------------------------------------------------------------------------------------------------------------------------------------------------------------------------------------------------------------------------------------------------------------------------------------------------------------------------------------------------------------------------------------------------------------------------------------------------------------------------------------------------------------------------------------------------------------------------------------------------------------------------------------------------------------------------------------------------------------------------------------------------------------------------------------------------------------------------------------------------------------------------------------------------------------------------------------------------------------------------------------------------------------------------------------------------------------------------------------------------------------------------------------------------------------------------------------------------------------------------------------------------------------------------------------------------------------------------------------------------------------------------------------------------------------------------------------------------------------------------------------------------------------------------------------------------------------------------------------------------------------------------------------------------------------------------------------------------------------------------------------------------------------------------------------------------------------------------------------------------------------------------------------------------------------------------------------|
| Journal:                      | <i>BMJ Open</i>                                                                                                                                                                                                                                                                                                                                                                                                                                                                                                                                                                                                                                                                                                                                                                                                                                                                                                                                                                                                                                                                                                                                                                                                                                                                                                                                                                                                                                                                                                                                                                                                                                                                                                                                                                                                                                                                                                                                                                                                                                                                                                                                                                                                                                                                                                                                               |
| Manuscript ID                 | bmjopen-2017-018190.R3                                                                                                                                                                                                                                                                                                                                                                                                                                                                                                                                                                                                                                                                                                                                                                                                                                                                                                                                                                                                                                                                                                                                                                                                                                                                                                                                                                                                                                                                                                                                                                                                                                                                                                                                                                                                                                                                                                                                                                                                                                                                                                                                                                                                                                                                                                                                        |
| Article Type:                 | Research                                                                                                                                                                                                                                                                                                                                                                                                                                                                                                                                                                                                                                                                                                                                                                                                                                                                                                                                                                                                                                                                                                                                                                                                                                                                                                                                                                                                                                                                                                                                                                                                                                                                                                                                                                                                                                                                                                                                                                                                                                                                                                                                                                                                                                                                                                                                                      |
| Date Submitted by the Author: | 09-Jan-2018                                                                                                                                                                                                                                                                                                                                                                                                                                                                                                                                                                                                                                                                                                                                                                                                                                                                                                                                                                                                                                                                                                                                                                                                                                                                                                                                                                                                                                                                                                                                                                                                                                                                                                                                                                                                                                                                                                                                                                                                                                                                                                                                                                                                                                                                                                                                                   |
| Complete List of Authors:     | <p>Emond, Marcel; Université Laval Faculté de médecine, Médecine d'urgence; Centre de recherche du CHU de Québec-Université Laval, Axe Santé des populations et pratiques optimales en santé</p> <p>Boucher, Valérie; Centre de recherche du CHU de Québec-Université Laval, Axe Santé des populations et pratiques optimales en santé; Centre d'excellence sur le vieillissement de Québec</p> <p>Carmichael, Pierre-Hugues; Centre d'excellence sur le vieillissement de Québec</p> <p>Voyer, Philippe; Université Laval Faculté de médecine; Centre de recherche du CHU de Québec-Université Laval, Axe Santé des populations et pratiques optimales en santé</p> <p>Pelletier, Mathieu; Université Laval; 7Centre Intégré de Santé et de Services Sociaux de Lanaudière</p> <p>Gouin, Émilie; Centre Hospitalier Régional de Trois-Rivières</p> <p>Daoust, Raoul; Hôpital Sacré-Coeur de Montréal; Université de Montréal</p> <p>Berthelot, Simon; Centre de recherche du CHU de Québec, Axe Santé des populations et pratiques optimales en santé; CHU de Québec-Université Laval, Médecine d'urgence</p> <p>Lamontagne, Marie-Ève; 6Centre interdisciplinaire de recherche en réadaptation et intégration sociale; Université Laval</p> <p>Morin, Michèle; Université Laval; Centre de recherche du CHU de Québec-Université Laval, Axe Santé des populations et pratiques optimales en santé</p> <p>Lemire, Stéphane; Université Laval; Centre de recherche du CHU de Québec-Université Laval, Axe Santé des populations et pratiques optimales en santé</p> <p>Thien Tuong, Minh Vu; Institut de gériatrie de l'Université de Montréal; 11Centre de recherche du Centre hospitalier de l'Université de Montréal</p> <p>Nadeau, Alexandra; Centre de recherche du CHU de Québec-Université Laval, Axe Santé des populations et pratiques optimales en santé; Centre d'excellence sur le vieillissement de Québec</p> <p>Rheault, Marcel; CSSS de Trois-Rivières</p> <p>Juneau, Lucille; Centre Intégré Universitaire de Services Sociaux et de Santé de la Capitale-Nationale</p> <p>Le Sage, Natalie; Centre de recherche du CHU de Québec-Université Laval, Axe Santé des populations et pratiques optimales en santé; CHU de Québec-Université Laval, Médecine d'urgence</p> <p>Lee, Jacques; University of Toronto, Clinical Epidemiology Unit</p> |
| <b>Primary Subject            | Emergency medicine                                                                                                                                                                                                                                                                                                                                                                                                                                                                                                                                                                                                                                                                                                                                                                                                                                                                                                                                                                                                                                                                                                                                                                                                                                                                                                                                                                                                                                                                                                                                                                                                                                                                                                                                                                                                                                                                                                                                                                                                                                                                                                                                                                                                                                                                                                                                            |

1  
2  
3  
4  
5  
6  
7  
8  
9  
10  
11  
12  
13  
14  
15  
16  
17  
18  
19  
20  
21  
22  
23  
24  
25  
26  
27  
28  
29  
30  
31  
32  
33  
34  
35  
36  
37  
38  
39  
40  
41  
42  
43  
44  
45  
46  
47  
48  
49  
50  
51  
52  
53  
54  
55  
56  
57  
58  
59  
60

|                            |                                                                                        |
|----------------------------|----------------------------------------------------------------------------------------|
| Heading</b>:               |                                                                                        |
| Secondary Subject Heading: | Geriatric medicine                                                                     |
| Keywords:                  | Delirium, Emergency Department, Community seniors, Cognitive status, Functional status |
|                            |                                                                                        |

SCHOLARONE™  
Manuscripts

For peer review only

1  
2  
3 1 Incidence of delirium in the Canadian Emergency Department and its consequences on hospital length  
4 2 of stay : a prospective observational multicentre cohort study

5  
6 3 Marcel Émond, MD, MSc<sup>1-2-3-4-5</sup>, Valérie Boucher, BA<sup>1-3-4-6</sup>, Pierre-Hugues Carmichael, MSc<sup>4</sup>, Philippe  
7 4 Voyer RN, PhD<sup>1-3-4</sup>, Mathieu Pelletier, MD<sup>3-7</sup>, Émilie Gouin, MD<sup>8</sup>, Raoul Daoust, MD MSc<sup>9-10</sup>, Simon  
8 5 Berthelot, MD, MSc<sup>1-2-3</sup>, Marie-Eve Lamontagne, PhD<sup>3-6</sup>, Michèle Morin, MD, MSc<sup>1-3</sup>, Stéphane Lemire,  
9 6 MD<sup>1-3-4</sup>, Thien Tuong Minh Vu, MD<sup>11-12-13</sup>, Alexandra Nadeau, MSc<sup>1-3-4-6</sup>, Marcel Rheault<sup>14</sup>, Lucille  
10 7 Juneau<sup>15</sup>, Natalie Le Sage, PhD<sup>1-2-3</sup>, Jacques Lee, MD MSc,<sup>16-17</sup>

11  
12  
13 8 <sup>1</sup>Axe Santé des populations et pratiques optimales en santé, Centre de recherche du CHU de Québec-  
14 9 Université Laval, Québec, Canada; <sup>2</sup>Département de médecine d'urgence, CHU de Québec-Université  
15 10 Laval; <sup>3</sup>Université Laval, Québec, Canada; <sup>4</sup>Centre d'excellence sur le vieillissement de Québec, Québec,  
16 11 Canada; <sup>5</sup>Centre de recherche sur les soins et les services de première ligne de l'Université Laval; <sup>6</sup>Centre  
17 12 interdisciplinaire de recherche en réadaptation et intégration sociale, Québec, Canada; <sup>7</sup>Centre Intégré de  
18 13 Santé et de Services Sociaux de Lanaudière, Joliette, Canada; <sup>8</sup>Centre Hospitalier Régional de Trois-  
19 14 Rivières, Trois-Rivières, Canada; <sup>9</sup>Centre de recherche de l'Hôpital du Sacré-Cœur de Montréal,  
20 15 Montréal, Canada; <sup>10</sup>Université de Montréal, Montréal, Canada; <sup>11</sup>Centre de recherche du Centre  
21 16 hospitalier de l'Université de Montréal, Montréal, Canada; <sup>12</sup>Centre hospitalier de l'Université de  
22 17 Montréal; <sup>13</sup>Institut de gériatrie de l'Université de Montréal, Montréal, Canada; <sup>14</sup>CSSS de Trois-Rivières;  
23 18 <sup>15</sup>Centre Intégré Universitaire de Services Sociaux et de Santé de la Capitale-Nationale; <sup>16</sup>Department of  
24 19 Family and Community Medicine, University of Toronto, Toronto, Canada; <sup>17</sup>Sunnybrook Health  
25 20 Sciences center, Toronto, Canada;

26  
27  
28 21 **Corresponding author:** Marcel Émond MD, MSc, FRCP(C), CHU de Québec - Hôpital de l'Enfant-Jésus,  
29 22 1401, 18<sup>e</sup> rue, H-608, Québec (Québec) G1J 1Z4, Canada. Phone: (418) 649-0252, ext. 66423, Fax: (418)  
30 23 649-5832, Email: [marcel.emond@fmed.ulaval.ca](mailto:marcel.emond@fmed.ulaval.ca)

31  
32  
33 24  
34  
35 25 3177 words

36  
37 26  
38  
39 27 **Authors' contribution:** MÉ had full access to all of the data in the study and takes responsibility for the  
40 28 integrity of the data and the accuracy of the data analysis. He was responsible of design, funding,  
41 29 conduct of the study and writing of the manuscript. VB managed the study, led the analyses and wrote  
42 30 the manuscript. MÉ, VB and PHC were involved in the statistical analysis, and data interpretation. MP,  
43 31 RD, EG and MEL were responsible for all four site recruitment. PV, SB, MM, TTMV, JL, MR, SL, NLS and LJ  
44 32 are all collaborator of INDEED project. PHC, MP, RD, EG, MEL, PV, SB, MM, TTMV, AN, JL, MR, SL, NLS  
45 33 and LJ reviewed, and approved the manuscript.

46  
47  
48 34

49 35

50 36

51 37

1  
2  
3 1 **ABSTRACT**  
4

5 2 **Objective:** We aim to determine the incidence of delirium and describe its impacts on hospital  
6 3 length of stay (LOS) among non-delirious community older adults with an 8-hour exposure to  
7 4 the Emergency Department (ED) environment.

8  
9 5 **Design:** This is a prospective observational multicentre cohort study (March-July 2015). Patients  
10 6 were assessed 2x/day during their entire ED stay and up to 24 hours on hospital ward.

11  
12 7 **Setting:** The study took place in 4 Canadian EDs.

13  
14 8 **Participants:** 338 included patients: 1) aged  $\geq 65$ ; 2) who had an ED stay  $\geq 8$  hours; 3) were  
15 9 admitted to hospital ward; 4) were independent/semi-independent.

16  
17 10 **Main Outcome(s) and Measure(s):** The primary outcomes of this study were incident delirium  
18 11 in the ED or within 24 h of ward admission and ED and hospital LOS. Functional and cognitive  
19 12 status were assessed using validated Older Americans' Resources and Services (OARS) and the  
20 13 Telephone Interview for Cognitive Status- modified (TICS-m) tools. The Confusion Assessment  
21 14 Method (CAM) was used to detect incident delirium. Univariate and multivariate analyses were  
22 15 conducted to evaluate outcomes.

23  
24 16 **Results:** Mean age was 76.8 ( $\pm 8.1$ ), 17.7% were aged  $>85$  years old and 48.8% were male. The  
25 17 mean incidence of delirium was 12.1% (n=41). Median Interquartile range ED LOS was  
26 18 32.4 (24.5–47.9) hours and hospital LOS was 146.6 (75.2-267.8) hours. Adjusted mean hospital  
27 19 LOS was increased by 105.4 hours (4.4 days) (95% CI: [25.1, 162.0],  $p < 0.001$ ) for patients who  
28 20 developed an episode of delirium compared to non-delirious patient.

29  
30 21 **Conclusions:** An incident delirium was observed in 1 of 8 independent/semi-independent older  
31 22 adults after an 8-hour ED exposure. An episode of delirium increases hospital LOS by 4 days  
32 23 and therefore has important implications for patients and could contribute to ED overcrowding  
33 24 through a deleterious feedback loop.  
34  
35  
36  
37  
38  
39  
40  
41  
42  
43  
44  
45  
46  
47  
48  
49  
50  
51  
52  
53  
54  
55  
56  
57  
58  
59  
60

1  
2  
3 1 **Strengths and limitations of this study**  
4

- 5 2 - **Largest prospective study on incident delirium in the Emergency Department.**  
6 3 - **A systematic screening of delirium at study entry was realized with a validated tool.**  
7 4 - **Multiple patient assessments for incident delirium were conducted.**  
8 5 - **Study population was limited to independent/semi-independent elders, which may**  
9 6 **limit external validity of the findings.**  
10 7 - **Hospital LOS were adjusted for potential cofounders relating to geriatric care.**  
11  
12  
13 8

14  
15  
16  
17  
18  
19  
20  
21  
22  
23  
24  
25  
26  
27  
28  
29  
30  
31  
32  
33  
34  
35  
36  
37  
38  
39  
40  
41  
42  
43  
44  
45  
46  
47  
48  
49  
50  
51  
52  
53  
54  
55  
56  
57  
58  
59  
60

For peer review only

## 1 INTRODUCTION

2 In 2016, the youngest of the "baby-boomers" turned 50 years old and people aged 65 and older  
3 represented 18.1% of the population in Quebec.(1) It is foreseen that by 2031, the proportion of  
4 older adults aged over 65 will nearly double, with a major increase among those aged 85 and  
5 older.(2) Over the coming decades, those demographic trends will fundamentally change the  
6 make-up of the population served by Quebec Emergency Departments (ED). Older adults are  
7 already the main users of emergency health care services(3-5) and in 2012-2013, 40% of ED  
8 stretchers were occupied by patients aged over 65.(6) Furthermore, patients over 75 years of age  
9 have the highest ED visit rate of any age group and in 2012-2013 those patients occupied 25% of  
10 ED stretchers.(7, 8) Those numbers will only increase over time as the older adults population  
11 grows and this "Silver Tsunami"(9) will have major consequences on the healthcare of seniors  
12 and on our health care system in general.

13 Caring for older patients in the ED is particularly challenging.(10) Indeed, the time-pressure  
14 environment and high level of background noise may impede efficient communications with  
15 older patients.(11, 12) Moreover, specialized geriatric training for ED health professionals  
16 remains in its infancy(13) and they may not be as equipped as they should be to face the specific  
17 issues of older patients. All of this may contribute to the fact that older adults have higher rates  
18 of unplanned returns to the ED,(14, 15) of hospitalization,(16) falls,(17) loss of  
19 independence(18) and unrecognized delirium(19-21) following an emergency visit. Delirium is  
20 an acute brain dysfunction defined as a mental disorder of acute onset with a fluctuating course,  
21 characterized by a disturbance in consciousness, attention, orientation, memory, thought,  
22 perception and behavior.(22, 23) It is a common problem in the ED and its prevalence in older  
23 patients admitted to acute and long-term care facilities ranges between 9.6% and 89%.(21, 24-  
24 26)

25 In August of 2013, Inouye *et al.* published a systematic review(27) in which they found no study  
26 reporting the incidence of delirium in the ED. The same author also demonstrated that an ED  
27 stay of 12 hours or more was one of the strongest independent predictors of the onset of  
28 subsequent delirium in older patients.(28-30) This is of increasing concern, as recent ED wait  
29 times have become quite significant. Since then, a few prospective studies were conducted in  
30 order to explore the problem of ED-stay associated delirium.(30-32) To our knowledge, there are  
31 few multicenter studies aimed at describing the incidence of delirium in ED of developed  
32 countries, such as Canada. Because the literature regarding the incidence of delirium in the ED  
33 and its potential impacts on hospital length of stay (LOS), functional status and unplanned ED  
34 readmissions is scant, its consequences have yet to be clearly identified in order to orient modern  
35 acute medical care. A study by McCusker *et al.* even found that hospital stay was increased by  
36 7.78 days for patients who developed a delirium (incident delirium) during the first 7 days of  
37 their stay.(33) The onset of such complication in the ED could influence hospital LOS and reflect  
38 back on ED crowding and older adults' use of emergency health services. The present study  
39 focused on the incidence of delirium induced by emergency department stay. Although ED-  
40 induced delirium could be affected by acute illness, comorbidities, ED crowding metrics and  
41 health care providers' ability to provide basic care known to prevent delirium, we hypothesized  
42 that the incidence of new cases of delirium among older ED patients who are admitted to hospital  
43 affects a significant proportion of community older adults, and ED-induced delirium leads to

1  
2  
3 1 longer hospital LOS creating a deleterious feedback loop on ED care and operations (34). The  
4 2 study focused on the incident delirium because, as opposed to prevalent delirium, ED services  
5 3 can act in a way to prevent it.  
6

7 4 The objective of this study was to fill a basic knowledge gap regarding the incidence of delirium  
8 5 and its impacts on hospital LOS for older, community independent/semi-independent, non-  
9 6 delirious ED patients with an 8-hour ED stay who are admitted to a hospital ward.  
10  
11  
12 7  
13  
14  
15  
16  
17  
18  
19  
20  
21  
22  
23  
24  
25  
26  
27  
28  
29  
30  
31  
32  
33  
34  
35  
36  
37  
38  
39  
40  
41  
42  
43  
44  
45  
46  
47  
48  
49  
50  
51  
52  
53  
54  
55  
56  
57  
58  
59  
60

For peer review only



## 1 METHODS

### 2 Study setting and population

3 This prospective multicenter study included patients who presented to one of the 4 participating  
4 Quebec EDs (two university-affiliated level 1 trauma centers and two regional hospitals)  
5 between March and July 2015. **Inclusion criteria** were: 1) Patients aged 65 and over; 2) Patients  
6 with an ED stay of  $\geq 8$  hours; 3) Patients needing and/or waiting for admission to any hospital  
7 ward; 4) Independent or semi-independent patients (able to perform 5/7 activities of daily living  
8 according to the Older Americans Resources and Services scale (OARS)). **Exclusion criteria**  
9 were: 1) Patient with unstable medical condition requiring admission to the psychiatric ward,  
10 intensive or palliative care units; 2) Patient who are unable to consent; 3) Patients who live (or  
11 are in transition) in a long-term care facility; 4) Patients unable to speak French or English;  
12 5) Patients presenting a delirium before coming to the ED, upon arrival or by the end of the first  
13 8 hours in the ED; 6) Patients with a history of psychiatric disorders (such as schizophrenia,  
14 psychotic symptoms and bipolar disorder).

15 Based on soon to be published new recommendations from the Direction Nationale des  
16 Urgences regarding older patients' lengths of ED stay, which should be kept under 8 hours, we  
17 choose an 8-hour exposure for our patients, as opposed to the 12-hour exposure previously  
18 determined to be a predictor of subsequent delirium (28-30). Our pragmatic approach led us to  
19 include patients who need or are awaiting admission to a hospital ward; since, Caplan *et al.*  
20 showed that patients admitted to hospital have a significantly at higher proportion of delirium  
21 than their equivalent counterparts discharged and treated with home resources.(35) Also, even if  
22 we know that delirium is more prevalent in this population, we chose to exclude patients who are  
23 not independent or semi-independent, because we were mainly interested to investigate the  
24 impact of delirium on the most robust older patients. In addition, we chose to exclude patients  
25 who were unable to consent, because assessing initial interview and follow-up with those  
26 patients would have been difficult.

27 Potential participants were identified using the emergency department information system.  
28 Research assistants (RAs) obtained consent and screened the participants for eligibility after their  
29 8-hour exposure to the ED. Sociodemographic, medical and comorbidity data were collected  
30 upon initial interview. RAs also assessed patients' baseline physical, frailty and cognitive status.  
31 Patients were screened for delirium during initial interview, and twice a day (with at least  
32 6 hours between each evaluation) during their entire ED stay and up to 24 hours after being  
33 admitted to a hospital ward. We assessed the patient up to 24h on the basis that a patient who  
34 develop a delirium let say an hour after arrival on the ward is most likely due to the 48 hours in the ED  
35 than the first hour on the ward. We kept this evaluation for possible causality purposes. Potential  
36 participants were considered as "missed" when they was no RA on-site for the recruitment. RAs  
37 were on site for the screening of patients about 12 hours a day, 7 days a week.

### 38 Measures

39 Patients' frailty and physical status were assessed using respectively the Clinical Frailty Scale  
40 (CFS) (36) and the Older Americans Resources and Services scale (OARS)(37),while the

1  
2  
3 1 Telephone Interview for Cognitive Status-modified (TICS-m),(38) the Confusion Assessment  
4 2 Method (CAM) (39) and the Delirium Index (40), were used to assess cognitive status. Other  
5 3 information on medications, comorbidities (Charlson comorbidity risk index) (41), severity of  
6 4 illness (Acute Physiological and Chronic Health Evaluation II (APACHE II) (42) and ED  
7 5 environment evaluation were collected in addition to sociodemographic data.

8  
9  
10 6 The CAM is the most commonly used tool for the detection of delirium with its sensitivity  
11 7 ranging between 34% and 58% and its specificity between 89% and 94% when performed by a  
12 8 research assistant. However, even if this sensitivity seems low, it has been shown that when the  
13 9 CAM is administered several times during a shift, it is more sensitive than a diagnosis made by a  
14 10 psychiatrist.(43) There are two existing interpretation methods to the CAM scores: the sensitive  
15 11 (SENS) and the specific (SPEC) methods.(44) A patient has delirium according to the SENS  
16 12 method if they: had either an acute onset or a fluctuation in any of the items evaluated in the  
17 13 CAM, inattention and either disorganized thinking or altered state of consciousness.(25) The  
18 14 SENS method was used to ascertain delirium in this study. Because of the fluctuating nature of  
19 15 delirium, patients were systematically assessed with the CAM and the Delirium Index (a  
20 16 validated tool used to measure the severity of delirium) (40) twice a day during their entire ED  
21 17 stay. Furthermore, the CAM was used over a 24-hour period following transfer to the hospital  
22 18 ward. ED and ward nurses and doctors were blinded to the study's objectives in order to avoid  
23 19 them changing their practice. The TICS-m was used to assess baseline cognitive status of our  
24 20 study participants.(45) ED environmental information, such as presence of proper lighting  
25 21 (according to the RAs), patient's hydration, presence of physical restraints or medical  
26 22 interventions limiting movement at initial interview and presence of a family member or a friend  
27 23 at initial interview was also recorded by RAs. ED LOS was recorded from administrative  
28 24 databases. ED LOS was measured from the date and time of triage up to the date and time when  
29 25 the patients were physically transferred to the hospital ward.

30  
31  
32  
33  
34  
35 26 Each site's team of RAs received standardized training by an experienced member of the  
36 27 mentoring team of the *Centre d'Excellence sur le Vieillessement de Québec*(46), who also  
37 28 specializes in the administration of the CAM. They also attended a group training session  
38 29 conducted by the study coordinator and an experienced research nurse and underwent a 5-hour  
39 30 personalized field training. They were also provided with a detailed training manual. Inter-rater  
40 31 reliability was assessed during patient follow-ups at the coordinating site to ensure that the test  
41 32 was administered in a standardized manner.

42  
43  
44  
45 33 In order to be sure that the missed patients were similar to our participants, basic clinical and  
46 34 demographic data were collected on those missed patients. The incidence of delirium was also  
47 35 collected for those patients in their medical file, as reported by the ED medical staff..

## 48 49 36 **Outcomes**

50  
51 37 Incident delirium was the main outcome of this study, hospital LOS was our secondary outcome.  
52 38 Incident delirium was defined by a delirium who occurred either in the ED or in the first 24  
53 39 hours of the hospital stay. The CAM was administrated during the initial interview ensuring that  
54 40 the patient was not already delirious after the first 8 hours of their ED stay. Hospital LOS was

1  
2  
3 1 measured from ED triage up to the date and time of hospital discharge. Hospital LOS was  
4 2 compared between patients with a positive CAM and those with a negative CAM for each site.  
5

### 6 3 **Statistical analyses** 7

8 4 Descriptive statistics were computed on patient characteristics and measured outcomes.  
9 5 Cumulative incidence rates for delirium were estimated using Kaplan-Meier curves. Hospital  
10 6 LOS is compared in patients with and without incident delirium in the various sites using  
11 7 multiple linear regression, adjusting for ED LOS, APACHE, Charlson, OARS, age and TICS-m.  
12 8 Site and its interaction with incident delirium is treated as a fixed factor. TICS-m scores were  
13 9 adjusted for patients' level of education. Kappa statistics were computed to measure inter-rater  
14 10 reliability of the CAM. Based on an alpha of 5%, 138 patients would allow 80% power for an  
15 11 estimated overall incidence proportion of 15 % with 5% precision. Analyses were performed  
16 12 using SAS, version 9.4 (SAS Institute, Inc., Cary, NC).  
17  
18  
19

20 13 The Comité d'éthique du CHU de Québec acted as the centralized research ethics board and  
21 14 approved this study (project # MP-20-2015-2130). Written consent was obtained for each study  
22 15 participant. Patient records/information were anonymized prior to analysis.  
23  
24  
25  
26  
27  
28  
29  
30  
31  
32  
33  
34  
35  
36  
37  
38  
39  
40  
41  
42  
43  
44  
45  
46  
47  
48  
49  
50  
51  
52  
53  
54  
55  
56  
57  
58  
59  
60

## 1 RESULTS

### 2 Population

3 A total of 2699 patients were screened by research assistants across our 4 sites (figure 1). Of  
4 those, 1780 did not meet our inclusion criteria or had one of our exclusion criteria, 417 were  
5 missed and 164 refused to participate to the study. This leaves us with a sample of 338 patients  
6 (12.5%). Females represented 51.2% of our population and mean age was 76.8 ( $\pm 8.09$ ) (table 1).

7 A sample analysis of patients who were missed revealed that they had a similar profile to that of  
8 those who were included in our study. 54.9% were female, with a mean age of 77.4 ( $\pm 9.4$ ) years  
9 old. The mean Charlson Comorbidity Score was 1.7 ( $\pm 1.7$ ), 36.7% were considered level 1 or 2  
10 on the Canadian Triage Assessment Scale (CTAS) and 38% were level 3. The medical notes  
11 revealed only one case of incident delirium within 24 hours of triage for this group of patients.  
12 Table 1 provides details on sociodemographic and environmental variables.

### 13 Incidence of delirium

14 In our cohort, we found that the overall incidence of delirium was 12.1% (n=41) using the SENS  
15 method, overall incidence and its distribution across sites are provided in figure 2. Fourteen cases  
16 occurred in the ED, while 27 cases occurred on the ward. Our results indicate that the delirium  
17 incidence rate was 2.9 cases per 1000 patient-hours. Figure 3 shows a cumulative incidence of  
18 delirium curve. Median ED LOS before developing a delirium was 45.2 h (38.0-52.5). Inter-rater  
19 agreements were performed at the coordinating site on 12% of the site's participants. A perfect  
20 agreement was obtained regarding the incidence of delirium, and agreement for each of the CAM  
21 items had Kappa ranging between 0.63 and 1.0.

### 22 Hospital length of stay

23 Median (IQR) hospital LOS was 146.6 (75.2-267.8) hours. On average, adjusted hospital LOS  
24 was 209 hours (8.7 days) for non-delirious participants while patients who were found to have  
25 incident delirium had a 314.4-hour (13.1 days) hospital stay. The hospital LOS for each site are  
26 shown in Figure 4. Mean hospital adjusted LOS was significantly increased by 105.4 hours (4.4  
27 days) in the delirious patients compared to non-delirious patient ( $p=0.003$ ).

28

## 1 DISCUSSION

2 Our study is, to our knowledge, the first large Canadian prospective study aiming to determine  
3 the incidence of delirium induced by ED stay in older patients and then to analyze its impacts on  
4 the length of in-hospital stay. We found a 12.1% incidence for delirium in our cohort of  
5 338 older patients. Our study determined that there was a statistically significant association  
6 between incident delirium and hospital LOS, which was increased by 4.4 days in patients with  
7 incident delirium. A statistically non-significant increase of 5.0 hours was also found in the  
8 average ED LOS between those 2 groups, but this increase is of clinical importance for patient  
9 care.

10 Our results confirm the clinical importance of incident delirium in acute medicine care. A  
11 previous Canadian retrospective study was conducted by our team(47) using a chart-based  
12 CAM,(48) in which an 18% incidence of delirium was found in 200 patients medical charts. Half  
13 of those patients developed a delirium within 36 hours of arrival to the ED. It was shown  
14 previously that in prevalent delirious older ED patients that delirium is a predictor of prolonged  
15 hospital LOS (31). With our results, we confirm that incident delirium also has such result.  
16 However, contrary to prevalent delirium, it is possible to change the interventions in hospital to  
17 prevent this episode that has been shown to influence hospital LOS and long-term function and  
18 cognition (49).

19 In 2011, the Ministère de la Santé et des Services Sociaux has published its provincial guide  
20 "Approche adaptée à la personne âgée en milieu hospitalier", (50) a senior-friendly initiative  
21 which aimed to better address the in-hospital care of elders. This initiative stresses the  
22 importance of keeping lengths of stay as short as possible for older adults and presents various  
23 methods to prevent delirium. Every hospital in the province has implemented these guidelines at  
24 different levels. However, our results show that over 4 years post-implementation, ED lengths of  
25 stay for older patients are still quite significant in Quebec, increasing their risk of developing  
26 delirium according to previous studies. Our results also clearly confirm the fact that patients with  
27 incident delirium have longer hospital length of stay, making them more at risk for further  
28 complications. We also recorded an important difference in incident delirium across the 4 study  
29 sites, varying from 8.3% to 20%. Although inter-site comparisons were not powered by our  
30 sample size, many factors could have explained this difference. The different level of  
31 implementation of the provincial senior-friendly guidelines at each site could be a possible cause.

32  
33 Our study has some limitations. Our high rate of missed patients is mainly due to logistic  
34 constraints. However, after comparing the socio-demographic characteristics and comorbidities,  
35 we have found no significant difference between patients who were included and those who were  
36 missed. Furthermore, including those missed patients would likely have reinforced our results,  
37 resulting in higher delirium rates and longer ED and hospital LOS. Therefore, we believe the  
38 likelihood of selection bias is low. Because we have chosen to exclude patients with moderate to  
39 severe dementia, those who lived in long-term nursing homes, those with pre-existing  
40 psychological conditions and patients who had a lesser functional level, our cohort represents  
41 only a portion of the older adults population usually seen in the ED and may not be generalizable  
42 to all elders. We have made this decision because we were mainly interested to investigate the  
43 impact of delirium on the most robust older patients. The CAM was administered by different

1  
2  
3 1 research assistants, and therefore this might have underestimated or overestimated the frequency  
4 2 of an acute onset of a new symptom. Misclassification of delirium may have occurred as we  
5 3 excluded patient with delirium using a single first initial assessment with CAM, this pragmatic  
6 4 approach was used to ensure feasibility of the study. This may have introduced an interviewer  
7 5 bias; however, this situation is not any different from real-life clinical practice. We tried to  
8 6 decrease this potential bias by providing research assistants with standardized training, which  
9 7 was proven effective given our good inter-observer agreement. The study coordinator also  
10 8 reviewed every single research file to ensure completeness.

11 9 This study aimed at assessing the present situation in our Canadian EDs regarding the incidence  
12 10 of delirium induced by a prolonged ED-stay in independent and semi-independent older patients.  
13 11 The high incidence rate and increased hospital LOS are alarming and could have substantial  
14 12 consequences for the patient and for our health care system in general. Delirium itself is an  
15 13 economic burden in the United States as it is estimated to 152\$ billion per year.(31)

16 14 An interesting solution to this issue might be the use of a short triage tool aiming to identify  
17 15 patients more at risk of developing a delirium during their ED stay. Delaney *et al.* found that  
18 16 implementing an alert into the EMR system for triage nurses to screen every patient over 65  
19 17 years old for delirium helped ED nurses better identify 23% of patients as potentially positive for  
20 18 delirium.(32) However, more research is needed in order to identify an appropriate tool to be  
21 19 used by triage nurses.

22 20 Briefly, a 12.1% incidence for delirium was found in 4 Canadian EDs. Developing delirium  
23 21 increases hospital stay by 4.4, with the impact it can have on our health system.

24 22  
25 23 **Grant:** This study was funded by the Fond Québécois de Recherche en Santé (FQRS 29307).

26 24 **Conflicts of interest:** None

27 25 **Acknowledgements:** We would like to thank all the research assistants who participated in the  
28 26 recruitment of patients.

29 27 **Data sharing statement:** Being a prospective observational multicentre study, this project  
30 28 includes other data results to be solely used by our research team. The data use is guide by a  
31 29 public funding agency - FQRS

## 1 REFERENCES

1. Gouvernement du Québec - Institut de la statistique du Québec. Le bilan démographique du Québec. 2016.
2. Heffler S, Levitt K, Smith S, Smith C, Cowan C, Lazenby H, et al. Health spending growth up in 1999; Faster growth expected in the future. *Health Affairs*. 1999;20(2):193-203.
3. Data warehouse on trends in health and aging 2002. Available from: [www.cdc.gov/nchs/about/otheract/aging/trenddata.htm](http://www.cdc.gov/nchs/about/otheract/aging/trenddata.htm).
4. Mathews M, Barnsley J. Patients seeking care during acute illness. Why do they not see their regular physicians? *Can Fam Physician*. 2003;49:1498-503. PubMed PMID: 14649989.
5. Hahn B, Lefkowitz D. Annual expenses and sources of payment for health care services:. Rockville, MD: Agency For Health Care Policy and Research, Public Health Service, 1992 14 DHHS Pub. No AHCPR 93-0007.
6. Le Commissaire à la santé et au bien-être (CSBE). Les Urgences au Québec : Évolution de 2003-2004 à 2012-2013. 2014.
7. Burt CW, McCaig LF. Trends in hospital emergency department utilization: United States, 1992-99. *Vital Health Stat* 13. 2001(150):1-34. PubMed PMID: 11577602.
8. McCaig LF, Burt CW. National Hospital Ambulatory Medical Care Survey: 2002 emergency department summary. *Adv Data*. 2004(340):1-34. PubMed PMID: 15068333.
9. Delafuente JC. The silver tsunami is coming: will pharmacy be swept away with the tide? *Am J Pharm Educ*. 2009;73(1):1. PubMed PMID: 19513138; PubMed Central PMCID: PMC2690864.
10. Hwang U, Morrison RS. The geriatric emergency department. *Journal of the American Geriatrics Society*. 2007;55(11):1873-6. Epub 2007/10/06. doi: 10.1111/j.1532-5415.2007.01400.x. PubMed PMID: 17916122.
11. Baraff LJ, Bernstein E, Bradley K, Franken C, Gerson LW, Hannegan SR, et al. Perceptions of emergency care by the elderly: results of multicenter focus group interviews. *Ann Emerg Med*. 1992;21(7):814-8. PubMed PMID: 1610038.
12. Moons P, Arnauts H, Delooz HH. Nursing issues in care for the elderly in the emergency department: an overview of the literature. *Accid Emerg Nurs*. 2003;11(2):112-20. PubMed PMID: 12633630.
13. Hedges JR, Singal BM, Rousseau EW, Sanders AB, Bernstein E, McNamara RM, et al. Geriatric patient emergency visits. Part II: Perceptions of visits by geriatric and younger patients. *Ann Emerg Med*. 1992;21(7):808-13. Epub 1992/07/01. doi: S0196-0644(05)81026-1 [pii]. PubMed PMID: 1610037.
14. Boulton C, Dowd B, McCaffrey D, Boulton L, Hernandez R, Krulwich H. Screening elders for risk of hospital admission. *Journal of the American Geriatrics Society*. 1993;41(8):811-7. PubMed PMID: 8340558.
15. Friedmann PD, Jin L, Karrison TG, Hayley DC, Mulliken R, Walter J, et al. Early revisit, hospitalization, or death among older persons discharged from the ED. *Am J Emerg Med*. 2001;19(2):125-9. PubMed PMID: 11239256.
16. Marcantonio ER, McKean S, Goldfinger M, Kleefield S, Yurkofsky M, Brennan TA. Factors associated with unplanned hospital readmission among patients 65 years of age and older in a Medicare managed care plan. *Am J Med*. 1999;107(1):13-7. PubMed PMID: 10403347.
17. Speechley M, Tinetti M. Falls and injuries in frail and vigorous community elderly persons. *Journal of the American Geriatrics Society*. 1991;39(1):46-52. PubMed PMID: 1987256.
18. Aminzadeh F, Dalziel WB. Older adults in the emergency department: a systematic review of patterns of use, adverse outcomes, and effectiveness of interventions. *Ann Emerg Med*. 2002;39(3):238-47. PubMed PMID: 11867975.

19. Hustey FM, Meldon SW. The prevalence and documentation of impaired mental status in elderly emergency department patients. *Ann Emerg Med*. 2002;39(3):248-53. PubMed PMID: 11867976.
20. Han JH, Zimmerman EE, Cutler N, Schnelle J, Morandi A, Dittus RS, et al. Delirium in older emergency department patients: recognition, risk factors, and psychomotor subtypes. *Acad Emerg Med*. 2009;16(3):193-200. Epub 2009/01/22. doi: 10.1111/j.1553-2712.2008.00339.x. PubMed PMID: 19154565; PubMed Central PMCID: PMCPMC5015887.
21. Elie M, Rousseau F, Cole M, Primeau F, McCusker J, Bellavance F. Prevalence and detection of delirium in elderly emergency department patients. *CMAJ*. 2000;163(8):977-81. Epub 2000/11/09. PubMed PMID: 11068569; PubMed Central PMCID: PMC80546.
22. Cole MG. Delirium in elderly patients. *Am J Geriatr Psychiatry*. 2004;12(1):7-21. PubMed PMID: 14729554.
23. Han JH, Wilber ST. Altered mental status in older patients in the emergency department. *Clin Geriatr Med*. 2013;29(1):101-36. Epub 2012/11/28. doi: 10.1016/j.cger.2012.09.005. PubMed PMID: 23177603; PubMed Central PMCID: PMCPMC3614410.
24. Fick DM, Agostini JV, Inouye SK. Delirium superimposed on dementia: a systematic review. *Journal of the American Geriatrics Society*. 2002;50(10):1723-32. PubMed PMID: 12366629.
25. Lemiengre J, Nelis J, Joosten E, Braes T, Foreman M, Gastmans C, et al. Detection of delirium by bedside nurses using the confusion assessment method. *Journal of the American Geriatrics Society*. 2006;54(4):685-9. Epub 2006/05/12. doi: 10.1111/j.1532-5415.2006.00667.x. PubMed PMID: 16686883.
26. Voyer P, Richard S, Doucet L, Carmichael PH. Detecting delirium and subsyndromal delirium using different diagnostic criteria among demented long-term care residents. *J Am Med Dir Assoc*. 2009;10(3):181-8. PubMed PMID: 19233058.
27. Inouye SK, Westendorp RG, Saczynski JS. Delirium in elderly people. *Lancet*. 2014;383(9920):911-22. Epub 2013/09/03. doi: S0140-6736(13)60688-1 [pii] 10.1016/S0140-6736(13)60688-1. PubMed PMID: 23992774.
28. Inouye SK, Viscoli CM, Horwitz RI, Hurst LD, Tinetti ME. A predictive model for delirium in hospitalized elderly medical patients based on admission characteristics. *Ann Intern Med*. 1993;119(6):474-81. PubMed PMID: 8357112.
29. Inouye SK, Charpentier PA. Precipitating factors for delirium in hospitalized elderly persons. Predictive model and interrelationship with baseline vulnerability. *Jama*. 1996;275(11):852-7. PubMed PMID: 8596223.
30. Bo M, Bonetto M, Bottignole G, Porrino P, Coppo E, Tibaldi M, et al. Length of Stay in the Emergency Department and Occurrence of Delirium in Older Medical Patients. *Journal of the American Geriatrics Society*. 2016;64(5):1114-9. Epub 2016/05/11. doi: 10.1111/jgs.14103. PubMed PMID: 27160482.
31. Han JH, Eden S, Shintani A, Morandi A, Schnelle J, Dittus RS, et al. Delirium in older emergency department patients is an independent predictor of hospital length of stay. *Acad Emerg Med*. 2011;18(5):451-7. Epub 2011/04/28. doi: 10.1111/j.1553-2712.2011.01065.x. PubMed PMID: 21521405; PubMed Central PMCID: PMCPMC3768130.
32. Delaney M, Pepin J, Somes J. Emergency Department Delirium Screening Improves Care and Reduces Revisits for the Older Adult Patient. *J Emerg Nurs*. 2015;41(6):521-4. Epub 2015/09/28. doi: 10.1016/j.jen.2015.08.013. PubMed PMID: 26409656.
33. McCusker J, Cole MG, Dendukuri N, Belzile E. Does delirium increase hospital stay? *Journal of the American Geriatrics Society*. 2003;51(11):1539-46. Epub 2003/12/23. PubMed PMID: 14687382.
34. Forster AJ, Stiell I, Wells G, Lee AJ, van Wieringen C. The effect of hospital occupancy on emergency department length of stay and patient disposition. *Academic Emergency Medicine*. 2003;10:127-33.



- 1  
2  
3 1 35. Caplan GA, Coconis J, Woods J. Effect of hospital in the home treatment on physical and  
4 2 cognitive function: a randomized controlled trial. *J Gerontol A Biol Sci Med Sci*. 2005;60(8):1035-8. Epub  
5 3 2005/08/30. doi: 60/8/1035 [pii]. PubMed PMID: 16127109.
- 6 4 36. Rockwood K, Song X, MacKnight C, Bergman H, Hogan DB, McDowell I, et al. A global clinical  
7 5 measure of fitness and frailty in elderly people. *CMAJ*. 2005;173(5):489-95. Epub 2005/09/01. doi:  
8 6 173/5/489 [pii]  
9  
10 7 10.1503/cmaj.050051. PubMed PMID: 16129869; PubMed Central PMCID: PMC1188185.
- 11 8 37. Fillenbaum GG, Duke U. Multidimensional functional assessment of older adults: the Duke Older  
12 9 Americans Resources and Services procedures. Hillsdale, NJ: L. Erlbaum Associates; 1988. xii, 179 p. p.
- 13 10 38. de Jager C, Budge M, Clarke R. Utility of TICS-M for the assessment of cognitive function in older  
14 11 adults. *Int J Geriatr Psychiatry*. 2003;18(4):318-24.
- 15 12 39. Inouye SK, van Dyck CH, Alessi CA, Balkin S, Siegel AP, Horwitz RI. Clarifying confusion: the  
16 13 confusion assessment method. A new method for detection of delirium. *Ann Intern Med*.  
17 14 1990;113(12):941-8. PubMed PMID: 2240918.
- 18 15 40. McCusker J, Cole MG, Dendukuri N, Belzile E. The delirium index, a measure of the severity of  
19 16 delirium: new findings on reliability, validity, and responsiveness. *Journal of the American Geriatrics*  
20 17 *Society*. 2004;52(10):1744-9. Epub 2004/09/29. doi: 10.1111/j.1532-5415.2004.52471.x. PubMed PMID:  
21 18 15450055.
- 22 19 41. Frenkel WJ, Jongerius EJ, Mandies-van Uiter MJ, van Munster BC, De Rooij SE. Validation of the  
23 20 Charlson comorbidity index in acutely hospitalized elderly adults: a prospective cohort study. *Journal of*  
24 21 *the American Geriatrics Society*. 2014;62(2):342-246. doi: 10.1111/jgs.12635.
- 25 22 42. Knaus WA, Draper EA, Wagner DP, Zimmerman JE. APACHE II: a severity of disease classification  
26 23 system. *Critical Care Medicine*. 1985;13(10):818-29.
- 27 24 43. Zou Y, Cole MG, Primeau FJ, McCusker J, Bellavance F, Laplante J. Detection and diagnosis of  
28 25 delirium in the elderly: psychiatrist diagnosis, confusion assessment method, or consensus diagnosis? *Int*  
29 26 *Psychogeriatr*. 1998;10(3):303-8. Epub 1998/10/24. PubMed PMID: 9785149.
- 30 27 44. Inouye S. *CAM Training Manual*. New Haven, CT: Yale University School of Medicine; 1991.
- 31 28 45. Herr M, Ankri J. A critical review of the use of telephone tests to identify cognitive impairment in  
32 29 epidemiology and clinical research. *J Telemed Telecare*. 2013;19(1):45-54. Epub 2013/02/08. doi:  
33 30 10.1177/1357633x12474962. PubMed PMID: 23390209.
- 34 31 46. Centre intégré universitaire de santé et de services sociaux de la Capitale-Nationale. Centre  
35 32 d'excellence sur le vieillissement de Québec [May 1 2017]. Available from: [https://www.ciusss-](https://www.ciusss-capitalenationale.gouv.qc.ca/expertise-et-partenariat/le-centre-dexcellence-sur-le-vieillessement-de-quebec)  
36 33 [capitalenationale.gouv.qc.ca/expertise-et-partenariat/le-centre-dexcellence-sur-le-vieillessement-de-](https://www.ciusss-capitalenationale.gouv.qc.ca/expertise-et-partenariat/le-centre-dexcellence-sur-le-vieillessement-de-quebec)  
37 34 [quebec](https://www.ciusss-capitalenationale.gouv.qc.ca/expertise-et-partenariat/le-centre-dexcellence-sur-le-vieillessement-de-quebec).
- 38 35 47. Émond M, Grenier D, Morin J, Eagles D, Boucher V, Le Sage N, et al. Emergency Department stay  
39 36 associated delirium in older patients. *Canadian Geriatrics Journal*. 2017;20(1).
- 40 37 48. Inouye SK, Leo-Summers L, Zhang Y, Bogardus ST, Jr., Leslie DL, Agostini JV. A chart-based  
41 38 method for identification of delirium: validation compared with interviewer ratings using the confusion  
42 39 assessment method. *Journal of the American Geriatrics Society*. 2005;53(2):312-8. PubMed PMID:  
43 40 15673358.
- 44 41 49. Han JH, Vasilevskis EE, Chandrasekhar R, Liu X, Schnelle JF, Dittus RS, et al. Delirium in the  
45 42 Emergency Department and Its Extension into Hospitalization (DELINTEATE) Study: Effect on 6-month  
46 43 Function and Cognition. *The American Geriatrics Society*. 2017;65:1333-8. doi: 10.1111/jgs.14824.
- 47 44 50. Ministère de la Santé et des Services Sociaux. Approche adaptée à la personne âgée en milieu  
48 45 hospitalier - Cadre de référence. 2011.
- 49  
50  
51  
52  
53  
54  
55  
56  
57  
58  
59  
60

## 1 TABLES

2 Table 1. Description of the study population

|                                    | Site 1<br>n(%) | Site 2<br>n(%) | Site 3<br>n(%) | Site 4<br>n(%) | Site comparison<br>p-value | Total       |
|------------------------------------|----------------|----------------|----------------|----------------|----------------------------|-------------|
| <b>Age</b>                         |                |                |                |                |                            |             |
| 65-74 y/o                          | 61 (57)        | 21 (32)        | 38 (45)        | 35 (42)        | 0.001                      | 155 (46)    |
| 75-84 y/o                          | 36 (34)        | 23 (35)        | 35 (42)        | 29 (35)        |                            | 123 (36)    |
| ≥85 y/o                            | 9 (9)          | 21 (32)        | 11 (13)        | 19 (23)        |                            | 60 (18)     |
| <b>Sex</b>                         |                |                |                |                |                            |             |
| Female                             | 53 (50)        | 37 (57)        | 39 (46)        | 44 (53)        | 0.618                      | 173 (51)    |
| <b>CTAS</b>                        |                |                |                |                |                            |             |
| 1 & 2                              | 39 (37)        | 25 (38)        | 25 (30)        | 18 (22)        | 0.076                      | 107 (31,7)  |
| 3                                  | 47 (44)        | 28 (43)        | 43 (51)        | 37 (45)        |                            | 155 (45,9)  |
| 4 & 5                              | 20 (19)        | 12 (18)        | 16 (19)        | 28 (34)        |                            | 76 (22,5)   |
| <b>Admission diagnostic</b>        |                |                |                |                |                            |             |
| <b>Medical</b>                     |                |                |                |                |                            |             |
| Cardiology                         | 15 (14.0)      | 16 (21.9)      | 23 (25.2)      | 16 (18.0)      |                            | 70 (19.4)   |
| Pneumonology                       | 22 (20.6)      | 15 (20.5)      | 26 (28.6)      | 12 (13.5)      |                            | 75 (20.8)   |
| Gastroenterology                   | 13 (12.1)      | 7 (9.6)        | 8 (8.8)        | 17 (19.1)      |                            | 45 (12.5)   |
| Internal medicine                  | 6 (5.6)        | 8 (11.0)       | 7 (7.7)        | 8 (9.0)        |                            | 29 (8.1)    |
| Neurology                          | 13 (12.1)      | 7 (9.6)        | 9 (9.9)        | 10 (11.2)      |                            | 39 (10.8)   |
| Other                              | 28 (26.2)      | 14 (19.2)      | 14 (15.4)      | 21 (23.6)      |                            | 77 (21.4)   |
| <b>Surgical</b>                    |                |                |                |                |                            |             |
| Orthopedics                        | 2 (1.9)        | 6 (8.2)        | 4 (4.4)        | 5 (5.6)        |                            | 17 (4.7)    |
| General surgery                    | 5 (4.7)        | 0 (0)          | 0 (0)          | 0 (0)          |                            | 5 (1.4)     |
| Other                              | 3 (2.8)        | 0 (0)          | 0 (0)          | 0 (0)          |                            | 3 (0.8)     |
| <b>Time of day of presentation</b> |                |                |                |                |                            |             |
| 0:00-8:00                          | 18 (16.5)      | 12 (16.2)      | 21 (22.1)      | 5 (5.6)        |                            | 56 (15.3)   |
| 8:00-16:00                         | 66 (60.6)      | 34 (46.0)      | 43 (45.3)      | 54 (60.7)      |                            | 197 (53.7)  |
| 16:00-0:00                         | 25 (22.9)      | 28 (37.8)      | 31 (32.6)      | 30 (33.7)      |                            | 114 (31.0)  |
| OARS at baseline (mean ± SD)       | 26.33 ±1.98    | 26.41 ±2.20    | 25.95 ±2.60    | 24.92 ±2.41    | <0.001                     | 25.91 ±2.36 |
| TICS-m at baseline (mean ± SD)*    | 30.36 ±5.68    | 31.88 ±4.69    | 29.37 ±5.92    | 26.81 ±6.70    | <0.001                     | 29.53 ±6.08 |
| Charlson (mean ± SD)               | 1.93 ±1.78     | 1.65 ±1.69     | 3.13 ±2.48     | 1.81 ±1.55     | <0.001                     | 2.14 ±1.99  |
| APACHE II (mean ± SD)              | 10.99 ±3.43    | 10.77 ±3.37    | 9.48 ±3.43     | 8.70 ±3.17     | <0.001                     | 10.01 ±3.48 |
| <b>Environmental factors</b>       |                |                |                |                |                            |             |
| Proper lighting <sup>a</sup>       | 65 (63)        | 49 (75)        | 71 (85)        | 18 (22)        | <0.001                     | 203 (61)    |
| <b>Patient hydration</b>           |                |                |                |                |                            |             |
| Fasting                            | 10 (10)        | 8 (12)         | 11 (13)        | 16 (19)        | 0.369                      | 45 (14)     |

|                                                |         |         |         |         |        |          |
|------------------------------------------------|---------|---------|---------|---------|--------|----------|
| Glass of water within reach                    | 70 (72) | 55 (85) | 52 (65) | 71 (86) | 0.005  | 248 (76) |
| Presence of saliva <sup>‡</sup>                | 74 (76) | 52 (80) | 49 (60) | 9 (11)  | <0.001 | 184 (56) |
| Any IV Fluids                                  | 75 (77) | 58 (89) | 78 (95) | 65 (78) | 0.003  | 276 (84) |
| <b>Physical restraints (any)<sup>+</sup></b>   | 78 (77) | 30 (46) | 1 (1)   | 65 (79) | <0.001 | 174 (53) |
| <b>Medical interventions limiting movement</b> |         |         |         |         |        |          |
| Bed rest                                       | 1 (1)   | 1 (2)   | 5 (6)   | 0 (0,0) | 0.071  | 7 (2)    |
| Urinary catheter                               | 7 (8)   | 5 (9)   | 2 (2)   | 2 (3)   | 0.217  | 16 (6)   |
| O2                                             | 15 (17) | 15 (26) | 22 (27) | 4 (6)   | 0.007  | 56 (19)  |
| Saline-lock Catheter or IV drip                | 72 (84) | 53 (91) | 75 (92) | 57 (88) | 0.377  | 257 (88) |
| Other                                          | 10 (12) | 8 (14)  | 18 (22) | 6 (9)   | 0.125  | 42 (14)  |
| <b>Temporal orientation aid<sup>•</sup></b>    | 67 (63) | 45 (69) | 53 (63) | 37 (45) | 0.010  | 202 (60) |

1 \* Adjusted for level of education

2 <sup>a</sup> According to the research assistant

3 <sup>‡</sup> Research assistant verified if the patients had saliva under their tongue

4 <sup>+</sup> Tablet, bed rails or other

5 <sup>•</sup> Clock, watch, cell phone, calendar

6 CTAS: Canadian Triage Assessment Scale; OARS: Older American's Resources and Services; TICS-m: Telephone  
 7 Interview for Cognitive Status-modified; APACHE II: Acute Physiological and Chronic Health Evaluation  
 8 II; IV: intravenous injection;

9

1  
2  
3 **1 FIGURES LEGEND**

4 **2 Figure 1. Study flowchart**

5  
6 **3 Figure 2. Distribution of delirium across participating sites**

7  
8 **4 Figure 3. Cumulative incidence of delirium curve**

9  
10 **5 Figure 4. Adjusted length of hospital stay (hours)\***

11  
12 \* Length of stay was adjusted for ED LOS, site, age, Charlson, APACHE, OARS and TICS-m  
13 scores. \*\*: Difference between No delirium and Incident delirium in terms of length of ED stay  
14 <0.05  
15

16  
17  
18  
19  
20  
21  
22  
23  
24  
25  
26  
27  
28  
29  
30  
31  
32  
33  
34  
35  
36  
37  
38  
39  
40  
41  
42  
43  
44  
45  
46  
47  
48  
49  
50  
51  
52  
53  
54  
55  
56  
57  
58  
59  
60

For peer review only

1  
2  
3  
4  
5  
6  
7  
8  
9  
10  
11  
12  
13  
14  
15  
16  
17  
18  
19  
20  
21  
22  
23  
24  
25  
26  
27  
28  
29  
30  
31  
32  
33  
34  
35  
36  
37  
38  
39  
40  
41  
42  
43  
44  
45  
46  
47  
48  
49  
50  
51  
52  
53  
54  
55  
56  
57  
58  
59  
60



Peer review only

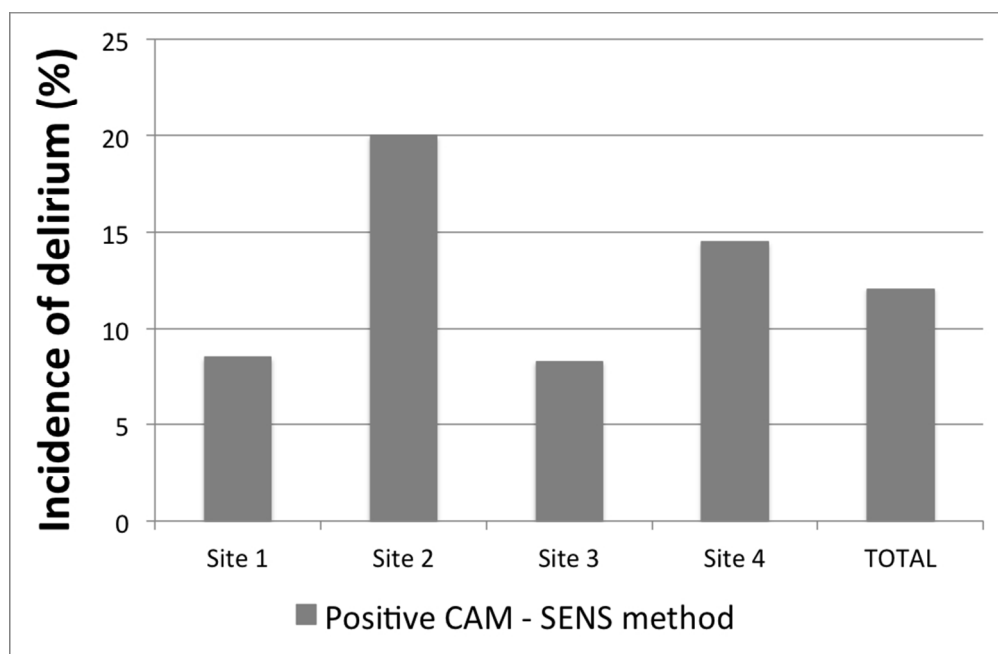

review only

1  
2  
3  
4  
5  
6  
7  
8  
9  
10  
11  
12  
13  
14  
15  
16  
17  
18  
19  
20  
21  
22  
23  
24  
25  
26  
27  
28  
29  
30  
31  
32  
33  
34  
35  
36  
37  
38  
39  
40  
41  
42  
43  
44  
45  
46  
47  
48  
49  
50  
51  
52  
53  
54  
55  
56  
57  
58  
59  
60



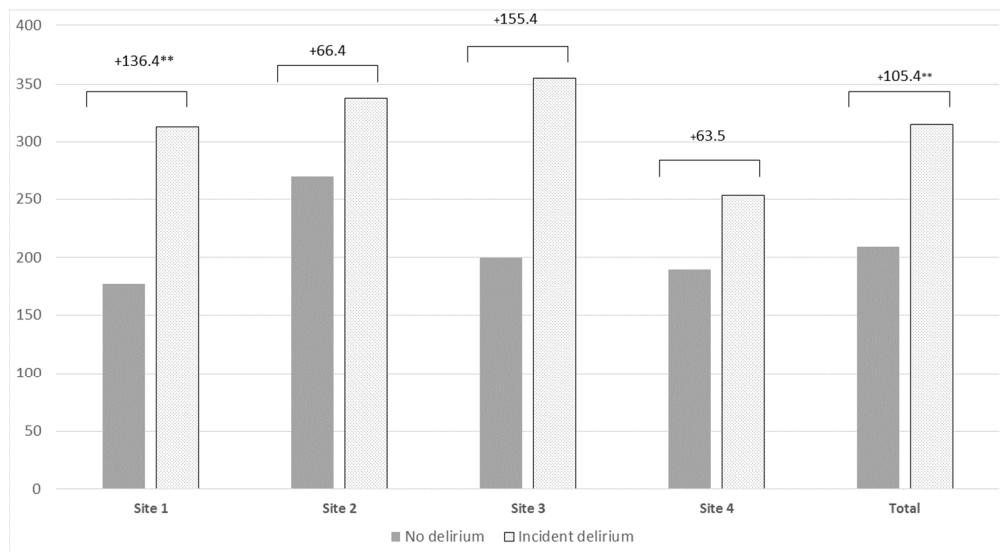

Length of stay was adjusted for site, age, Charlson, APACHE, OARS and TICS-m scores. \*\*: Difference between No delirium and Incident delirium in terms of length of ED stay <0.05

review only



**STROBE 2007 (v4) Statement—Checklist of items that should be included in reports of *cohort studies***

| Section/Topic             | Item # | Recommendation                                                                                                                                                                       | Reported on page # |
|---------------------------|--------|--------------------------------------------------------------------------------------------------------------------------------------------------------------------------------------|--------------------|
| Title and abstract        | 1      | (a) Indicate the study’s design with a commonly used term in the title or the abstract                                                                                               | 2                  |
|                           |        | (b) Provide in the abstract an informative and balanced summary of what was done and what was found                                                                                  | 2                  |
| <b>Introduction</b>       |        |                                                                                                                                                                                      |                    |
| Background/rationale      | 2      | Explain the scientific background and rationale for the investigation being reported                                                                                                 | 4                  |
| Objectives                | 3      | State specific objectives, including any prespecified hypotheses                                                                                                                     | 5                  |
| <b>Methods</b>            |        |                                                                                                                                                                                      |                    |
| Study design              | 4      | Present key elements of study design early in the paper                                                                                                                              | 6                  |
| Setting                   | 5      | Describe the setting, locations, and relevant dates, including periods of recruitment, exposure, follow-up, and data collection                                                      | 6                  |
| Participants              | 6      | (a) Give the eligibility criteria, and the sources and methods of selection of participants. Describe methods of follow-up                                                           | 6                  |
|                           |        | (b) For matched studies, give matching criteria and number of exposed and unexposed                                                                                                  | N/A                |
| Variables                 | 7      | Clearly define all outcomes, exposures, predictors, potential confounders, and effect modifiers. Give diagnostic criteria, if applicable                                             | 7                  |
| Data sources/ measurement | 8*     | For each variable of interest, give sources of data and details of methods of assessment (measurement). Describe comparability of assessment methods if there is more than one group | 7-8                |
| Bias                      | 9      | Describe any efforts to address potential sources of bias                                                                                                                            | 7-8                |
| Study size                | 10     | Explain how the study size was arrived at                                                                                                                                            | 9                  |
| Quantitative variables    | 11     | Explain how quantitative variables were handled in the analyses. If applicable, describe which groupings were chosen and why                                                         | 7-8                |
| Statistical methods       | 12     | (a) Describe all statistical methods, including those used to control for confounding                                                                                                | 7-8                |
|                           |        | (b) Describe any methods used to examine subgroups and interactions                                                                                                                  | N/A                |
|                           |        | (c) Explain how missing data were addressed                                                                                                                                          | 9                  |
|                           |        | (d) If applicable, explain how loss to follow-up was addressed                                                                                                                       | N/A                |
|                           |        | (e) Describe any sensitivity analyses                                                                                                                                                | 8                  |
| <b>Results</b>            |        |                                                                                                                                                                                      |                    |

|                          |     |                                                                                                                                                                                                              |     |
|--------------------------|-----|--------------------------------------------------------------------------------------------------------------------------------------------------------------------------------------------------------------|-----|
| Participants             | 13* | (a) Report numbers of individuals at each stage of study—eg numbers potentially eligible, examined for eligibility, confirmed eligible, included in the study, completing follow-up, and analysed            | 9   |
|                          |     | (b) Give reasons for non-participation at each stage                                                                                                                                                         | 9   |
|                          |     | (c) Consider use of a flow diagram                                                                                                                                                                           | 9   |
| Descriptive data         | 14* | (a) Give characteristics of study participants (eg demographic, clinical, social) and information on exposures and potential confounders                                                                     | 9   |
|                          |     | (b) Indicate number of participants with missing data for each variable of interest                                                                                                                          | N/A |
|                          |     | (c) Summarise follow-up time (eg, average and total amount)                                                                                                                                                  | N/A |
| Outcome data             | 15* | Report numbers of outcome events or summary measures over time                                                                                                                                               | N/A |
| Main results             | 16  | (a) Give unadjusted estimates and, if applicable, confounder-adjusted estimates and their precision (eg, 95% confidence interval). Make clear which confounders were adjusted for and why they were included | 9   |
|                          |     | (b) Report category boundaries when continuous variables were categorized                                                                                                                                    | N/A |
|                          |     | (c) If relevant, consider translating estimates of relative risk into absolute risk for a meaningful time period                                                                                             | N/A |
| Other analyses           | 17  | Report other analyses done—eg analyses of subgroups and interactions, and sensitivity analyses                                                                                                               | N/A |
| <b>Discussion</b>        |     |                                                                                                                                                                                                              |     |
| Key results              | 18  | Summarise key results with reference to study objectives                                                                                                                                                     | 10  |
| <b>Limitations</b>       |     |                                                                                                                                                                                                              |     |
| Interpretation           | 20  | Give a cautious overall interpretation of results considering objectives, limitations, multiplicity of analyses, results from similar studies, and other relevant evidence                                   | 10  |
| Generalisability         | 21  | Discuss the generalisability (external validity) of the study results                                                                                                                                        | 11  |
| <b>Other information</b> |     |                                                                                                                                                                                                              |     |
| Funding                  | 22  | Give the source of funding and the role of the funders for the present study and, if applicable, for the original study on which the present article is based                                                | 1   |

\*Give information separately for cases and controls in case-control studies and, if applicable, for exposed and unexposed groups in cohort and cross-sectional studies.

**Note:** An Explanation and Elaboration article discusses each checklist item and gives methodological background and published examples of transparent reporting. The STROBE checklist is best used in conjunction with this article (freely available on the Web sites of PLoS Medicine at <http://www.plosmedicine.org/>, Annals of Internal Medicine at <http://www.annals.org/>, and Epidemiology at <http://www.epidem.com/>). Information on the STROBE Initiative is available at [www.strobe-statement.org](http://www.strobe-statement.org).

# BMJ Open

## Incidence of delirium in the Canadian Emergency Department and its consequences on hospital length of stay : a prospective observational multicentre cohort study

|                               |                                                                                                                                                                                                                                                                                                                                                                                                                                                                                                                                                                                                                                                                                                                                                                                                                                                                                                                                                                                                                                                                                                                                                                                                                                                                                                                                                                                                                                                                                                                                                                                                                                                                                                                                                                                                                                                                                                                                                                                                                                                                                                                                                                                                                                                                                                                                                               |
|-------------------------------|---------------------------------------------------------------------------------------------------------------------------------------------------------------------------------------------------------------------------------------------------------------------------------------------------------------------------------------------------------------------------------------------------------------------------------------------------------------------------------------------------------------------------------------------------------------------------------------------------------------------------------------------------------------------------------------------------------------------------------------------------------------------------------------------------------------------------------------------------------------------------------------------------------------------------------------------------------------------------------------------------------------------------------------------------------------------------------------------------------------------------------------------------------------------------------------------------------------------------------------------------------------------------------------------------------------------------------------------------------------------------------------------------------------------------------------------------------------------------------------------------------------------------------------------------------------------------------------------------------------------------------------------------------------------------------------------------------------------------------------------------------------------------------------------------------------------------------------------------------------------------------------------------------------------------------------------------------------------------------------------------------------------------------------------------------------------------------------------------------------------------------------------------------------------------------------------------------------------------------------------------------------------------------------------------------------------------------------------------------------|
| Journal:                      | <i>BMJ Open</i>                                                                                                                                                                                                                                                                                                                                                                                                                                                                                                                                                                                                                                                                                                                                                                                                                                                                                                                                                                                                                                                                                                                                                                                                                                                                                                                                                                                                                                                                                                                                                                                                                                                                                                                                                                                                                                                                                                                                                                                                                                                                                                                                                                                                                                                                                                                                               |
| Manuscript ID                 | bmjopen-2017-018190.R4                                                                                                                                                                                                                                                                                                                                                                                                                                                                                                                                                                                                                                                                                                                                                                                                                                                                                                                                                                                                                                                                                                                                                                                                                                                                                                                                                                                                                                                                                                                                                                                                                                                                                                                                                                                                                                                                                                                                                                                                                                                                                                                                                                                                                                                                                                                                        |
| Article Type:                 | Research                                                                                                                                                                                                                                                                                                                                                                                                                                                                                                                                                                                                                                                                                                                                                                                                                                                                                                                                                                                                                                                                                                                                                                                                                                                                                                                                                                                                                                                                                                                                                                                                                                                                                                                                                                                                                                                                                                                                                                                                                                                                                                                                                                                                                                                                                                                                                      |
| Date Submitted by the Author: | 30-Jan-2018                                                                                                                                                                                                                                                                                                                                                                                                                                                                                                                                                                                                                                                                                                                                                                                                                                                                                                                                                                                                                                                                                                                                                                                                                                                                                                                                                                                                                                                                                                                                                                                                                                                                                                                                                                                                                                                                                                                                                                                                                                                                                                                                                                                                                                                                                                                                                   |
| Complete List of Authors:     | <p>Emond, Marcel; Université Laval Faculté de médecine, Médecine d'urgence; Centre de recherche du CHU de Québec-Université Laval, Axe Santé des populations et pratiques optimales en santé</p> <p>Boucher, Valérie; Centre de recherche du CHU de Québec-Université Laval, Axe Santé des populations et pratiques optimales en santé; Centre d'excellence sur le vieillissement de Québec</p> <p>Carmichael, Pierre-Hugues; Centre d'excellence sur le vieillissement de Québec</p> <p>Voyer, Philippe; Université Laval Faculté de médecine; Centre de recherche du CHU de Québec-Université Laval, Axe Santé des populations et pratiques optimales en santé</p> <p>Pelletier, Mathieu; Université Laval; 7Centre Intégré de Santé et de Services Sociaux de Lanaudière</p> <p>Gouin, Émilie; Centre Hospitalier Régional de Trois-Rivières</p> <p>Daoust, Raoul; Hôpital Sacré-Coeur de Montréal; Université de Montréal</p> <p>Berthelot, Simon; Centre de recherche du CHU de Québec, Axe Santé des populations et pratiques optimales en santé; CHU de Québec-Université Laval, Médecine d'urgence</p> <p>Lamontagne, Marie-Ève; 6Centre interdisciplinaire de recherche en réadaptation et intégration sociale; Université Laval</p> <p>Morin, Michèle; Université Laval; Centre de recherche du CHU de Québec-Université Laval, Axe Santé des populations et pratiques optimales en santé</p> <p>Lemire, Stéphane; Université Laval; Centre de recherche du CHU de Québec-Université Laval, Axe Santé des populations et pratiques optimales en santé</p> <p>Thien Tuong, Minh Vu; Institut de gériatrie de l'Université de Montréal; 11Centre de recherche du Centre hospitalier de l'Université de Montréal</p> <p>Nadeau, Alexandra; Centre de recherche du CHU de Québec-Université Laval, Axe Santé des populations et pratiques optimales en santé; Centre d'excellence sur le vieillissement de Québec</p> <p>Rheault, Marcel; CSSS de Trois-Rivières</p> <p>Juneau, Lucille; Centre Intégré Universitaire de Services Sociaux et de Santé de la Capitale-Nationale</p> <p>Le Sage, Natalie; Centre de recherche du CHU de Québec-Université Laval, Axe Santé des populations et pratiques optimales en santé; CHU de Québec-Université Laval, Médecine d'urgence</p> <p>Lee, Jacques; University of Toronto, Clinical Epidemiology Unit</p> |
| <b>Primary Subject            | Emergency medicine                                                                                                                                                                                                                                                                                                                                                                                                                                                                                                                                                                                                                                                                                                                                                                                                                                                                                                                                                                                                                                                                                                                                                                                                                                                                                                                                                                                                                                                                                                                                                                                                                                                                                                                                                                                                                                                                                                                                                                                                                                                                                                                                                                                                                                                                                                                                            |

1  
2  
3  
4  
5  
6  
7  
8  
9  
10  
11  
12  
13  
14  
15  
16  
17  
18  
19  
20  
21  
22  
23  
24  
25  
26  
27  
28  
29  
30  
31  
32  
33  
34  
35  
36  
37  
38  
39  
40  
41  
42  
43  
44  
45  
46  
47  
48  
49  
50  
51  
52  
53  
54  
55  
56  
57  
58  
59  
60

|                            |                                                                                        |
|----------------------------|----------------------------------------------------------------------------------------|
| Heading</b>:               |                                                                                        |
| Secondary Subject Heading: | Geriatric medicine                                                                     |
| Keywords:                  | Delirium, Emergency Department, Community seniors, Cognitive status, Functional status |
|                            |                                                                                        |

SCHOLARONE™  
Manuscripts

For peer review only

1  
2  
3 1 Incidence of delirium in the Canadian Emergency Department and its consequences on hospital length  
4 2 of stay : a prospective observational multicentre cohort study

5  
6 3 Marcel Émond, MD, MSc<sup>1-2-3-4-5</sup>, Valérie Boucher, BA<sup>1-3-4-6</sup>, Pierre-Hugues Carmichael, MSc<sup>4</sup>, Philippe  
7 4 Voyer RN, PhD<sup>1-3-4</sup>, Mathieu Pelletier, MD<sup>3-7</sup>, Émilie Gouin, MD<sup>8</sup>, Raoul Daoust, MD MSc<sup>9-10</sup>, Simon  
8 5 Berthelot, MD, MSc<sup>1-2-3</sup>, Marie-Eve Lamontagne, PhD<sup>3-6</sup>, Michèle Morin, MD, MSc<sup>1-3</sup>, Stéphane Lemire,  
9 6 MD<sup>1-3-4</sup>, Thien Tuong Minh Vu, MD<sup>11-12-13</sup>, Alexandra Nadeau, MSc<sup>1-3-4-6</sup>, Marcel Rheault<sup>14</sup>, Lucille  
10 7 Juneau<sup>15</sup>, Natalie Le Sage, PhD<sup>1-2-3</sup>, Jacques Lee, MD MSc,<sup>16-17</sup>

11  
12  
13 8 <sup>1</sup>Axe Santé des populations et pratiques optimales en santé, Centre de recherche du CHU de Québec-  
14 9 Université Laval, Québec, Canada; <sup>2</sup>Département de médecine d'urgence, CHU de Québec-Université  
15 10 Laval; <sup>3</sup>Université Laval, Québec, Canada; <sup>4</sup>Centre d'excellence sur le vieillissement de Québec, Québec,  
16 11 Canada; <sup>5</sup>Centre de recherche sur les soins et les services de première ligne de l'Université Laval; <sup>6</sup>Centre  
17 12 interdisciplinaire de recherche en réadaptation et intégration sociale, Québec, Canada; <sup>7</sup>Centre Intégré de  
18 13 Santé et de Services Sociaux de Lanaudière, Joliette, Canada; <sup>8</sup>Centre Hospitalier Régional de Trois-  
19 14 Rivières, Trois-Rivières, Canada; <sup>9</sup>Centre de recherche de l'Hôpital du Sacré-Cœur de Montréal,  
20 15 Montréal, Canada; <sup>10</sup>Université de Montréal, Montréal, Canada; <sup>11</sup>Centre de recherche du Centre  
21 16 hospitalier de l'Université de Montréal, Montréal, Canada; <sup>12</sup>Centre hospitalier de l'Université de  
22 17 Montréal; <sup>13</sup>Institut de gériatrie de l'Université de Montréal, Montréal, Canada; <sup>14</sup>CSSS de Trois-Rivières;  
23 18 <sup>15</sup>Centre Intégré Universitaire de Services Sociaux et de Santé de la Capitale-Nationale; <sup>16</sup>Department of  
24 19 Family and Community Medicine, University of Toronto, Toronto, Canada; <sup>17</sup>Sunnybrook Health  
25 20 Sciences center, Toronto, Canada;

26  
27  
28 21 **Corresponding author:** Marcel Émond MD, MSc, FRCP(C), CHU de Québec - Hôpital de l'Enfant-Jésus,  
29 22 1401, 18<sup>e</sup> rue, H-608, Québec (Québec) G1J 1Z4, Canada. Phone: (418) 649-0252, ext. 66423, Fax: (418)  
30 23 649-5832, Email: [marcel.emond@fmed.ulaval.ca](mailto:marcel.emond@fmed.ulaval.ca)

31  
32  
33 24  
34  
35 25 3177 words

36  
37 26  
38  
39 27 **Authors' contribution:** MÉ had full access to all of the data in the study and takes responsibility for the  
40 28 integrity of the data and the accuracy of the data analysis. He was responsible for design, funding,  
41 29 conduct of the study and writing of the manuscript. VB managed the study, led the analyses and wrote  
42 30 the manuscript. MÉ, VB and PHC were involved in the statistical analysis, and data interpretation. MP,  
43 31 RD, EG and MEL were responsible for recruitment at all four sites. PV, SB, MM, TTMV, JL, MR, SL, NLS  
44 32 and LJ are all collaborators of INDEED project. PHC, MP, RD, EG, MEL, PV, SB, MM, TTMV, AN, JL, MR, SL,  
45 33 NLS and LJ reviewed and approved the manuscript.

46  
47  
48  
49 34

50  
51 35

52  
53 36

54  
55 37

1  
2  
3 1 **ABSTRACT**  
4

5 2 **Objective:** We aim to determine the incidence of delirium and describe its impacts on hospital  
6 3 length of stay (LOS) among non-delirious community dwelling older adults with an 8-hour  
7 4 exposure to the Emergency Department (ED) environment.

8  
9 5 **Design:** This is a prospective observational multicentre cohort study (March-July 2015). Patients  
10 6 were assessed 2x/day during their entire ED stay and up to 24 hours on hospital ward.

11  
12 7 **Setting:** The study took place in 4 Canadian EDs.

13  
14 8 **Participants:** 338 included patients: 1) aged  $\geq 65$ ; 2) who had an ED stay  $\geq 8$  hours; 3) were  
15 9 admitted to hospital ward; 4) were independent/semi-independent.

16  
17  
18 10 **Main Outcome(s) and Measure(s):** The primary outcomes of this study were incident delirium  
19 11 in the ED or within 24 h of ward admission and ED and hospital LOS. Functional and cognitive  
20 12 status were assessed using validated Older Americans' Resources and Services (OARS) and the  
21 13 Telephone Interview for Cognitive Status- modified (TICS-m) tools. The Confusion Assessment  
22 14 Method (CAM) was used to detect incident delirium. Univariate and multivariate analyses were  
23 15 conducted to evaluate outcomes.

24  
25  
26 16 **Results:** Mean age was 76.8 ( $\pm 8.1$ ), 17.7% were aged  $>85$  years old and 48.8% were male. The  
27 17 mean incidence of delirium was 12.1% (n=41). Median Interquartile range ED LOS was  
28 18 32.4 (24.5–47.9) hours and hospital LOS was 146.6 (75.2-267.8) hours. Adjusted mean hospital  
29 19 LOS was increased by 105.4 hours (4.4 days) (95% CI: [25.1, 162.0],  $p < 0.001$ ) for patients who  
30 20 developed an episode of delirium compared to non-delirious patient.

31  
32  
33 21 **Conclusions:** An incident delirium was observed in 1 of 8 independent/semi-independent older  
34 22 adults after an 8-hour ED exposure. An episode of delirium increases hospital LOS by 4 days  
35 23 and therefore has important implications for patients and could contribute to ED overcrowding  
36 24 through a deleterious feedback loop.

37  
38  
39 25  
40  
41  
42  
43  
44  
45  
46  
47  
48  
49  
50  
51  
52  
53  
54  
55  
56  
57  
58  
59  
60

1  
2  
3 1 **Strengths and limitations of this study**  
4

- 5 2 - **Largest prospective study on incident delirium in the Emergency Department.**  
6 3 - **A systematic screening of delirium at study entry was realized with a validated tool.**  
7 4 - **Multiple patient assessments for incident delirium were conducted.**  
8 5 - **Study population was limited to independent/semi-independent elders, which may**  
9 6 **limit external validity of the findings.**  
10 7 - **Hospital LOS were adjusted for potential cofounders relating to geriatric care.**  
11  
12  
13 8

14  
15  
16  
17  
18  
19  
20  
21  
22  
23  
24  
25  
26  
27  
28  
29  
30  
31  
32  
33  
34  
35  
36  
37  
38  
39  
40  
41  
42  
43  
44  
45  
46  
47  
48  
49  
50  
51  
52  
53  
54  
55  
56  
57  
58  
59  
60

For peer review only

## 1 INTRODUCTION

2 In 2016, the youngest of the "baby-boomers" turned 50 years old and people aged 65 and older  
3 represented 18.1% of the population in Quebec.(1) It is foreseen that by 2031, the proportion of  
4 older adults aged over 65 will nearly double, with a major increase among those aged 85 and  
5 older.(2) Over the coming decades, those demographic trends will fundamentally change the  
6 make-up of the population served by Quebec Emergency Departments (ED). Older adults are  
7 already the main users of emergency health care services(3-5) and in 2012-2013, 40% of ED  
8 stretchers were occupied by patients aged over 65.(6) Furthermore, patients over 75 years of age  
9 have the highest ED visit rate of any age group and in 2012-2013 those patients occupied 25% of  
10 ED stretchers.(7, 8) Those numbers will only increase over time as the older adults population  
11 grows and this "Silver Tsunami"(9) will have major consequences on the healthcare of seniors  
12 and on our health care system in general.

13 Caring for older patients in the ED is particularly challenging.(10) Indeed, the time-pressure  
14 environment and high level of background noise may impede efficient communications with  
15 older patients.(11, 12) Moreover, specialized geriatric training for ED health professionals  
16 remains in its infancy(13) and they may not be as equipped as they should be to face the specific  
17 issues of older patients. All of this may contribute to the fact that older adults have higher rates  
18 of unplanned returns to the ED,(14, 15) of hospitalization,(16) falls,(17) loss of  
19 independence(18) and unrecognized delirium(19-21) following an emergency visit. Delirium is  
20 an acute brain dysfunction defined as a mental disorder of acute onset with a fluctuating course,  
21 characterized by a disturbance in consciousness, attention, orientation, memory, thought,  
22 perception and behavior.(22, 23) It is a common problem in the ED and its prevalence in older  
23 patients admitted to acute and long-term care facilities ranges between 9.6% and 89%.(21, 24-  
24 26)

25 In August of 2013, Inouye *et al.* published a systematic review(27) in which they found no study  
26 reporting the incidence of delirium in the ED. The same author also demonstrated that an ED  
27 stay of 12 hours or more was one of the strongest independent predictors of the onset of  
28 subsequent delirium in older patients.(28-30) This is of increasing concern, as recent ED wait  
29 times have become quite significant. Since then, a few prospective studies were conducted in  
30 order to explore the problem of ED-stay associated delirium.(30-32) To our knowledge, there are  
31 few multicenter studies aimed at describing the incidence of delirium in ED of developed  
32 countries, such as Canada. Because the literature regarding the incidence of delirium in the ED  
33 and its potential impacts on hospital length of stay (LOS), functional status and unplanned ED  
34 readmissions is scant, its consequences have yet to be clearly identified in order to orient modern  
35 acute medical care. A study by McCusker *et al.* even found that hospital stay was increased by  
36 7.78 days for patients who developed a delirium (incident delirium) during the first 7 days of  
37 their stay.(33) The onset of such complication in the ED could influence hospital LOS and reflect  
38 back on ED crowding and older adults' use of emergency health services. The present study  
39 focused on the incidence of delirium induced by emergency department stay. Although ED-  
40 induced delirium could be affected by acute illness, comorbidities, ED crowding metrics and  
41 health care providers' ability to provide basic care known to prevent delirium, we hypothesized  
42 that the incidence of new cases of delirium among older ED patients who are admitted to hospital  
43 affects a significant proportion of community older adults, and ED-induced delirium leads to



1  
2  
3 1 longer hospital LOS creating a deleterious feedback loop on ED care and operations (34). The  
4 2 study focused on the incident delirium because, as opposed to prevalent delirium, ED services  
5 3 can act in a way to prevent it.  
6

7 4 The objective of this study was to fill a basic knowledge gap regarding the incidence of delirium  
8 5 and its impacts on hospital LOS for older, community independent/semi-independent, non-  
9 6 delirious ED patients with an 8-hour ED stay who are admitted to a hospital ward.  
10  
11  
12 7  
13  
14  
15  
16  
17  
18  
19  
20  
21  
22  
23  
24  
25  
26  
27  
28  
29  
30  
31  
32  
33  
34  
35  
36  
37  
38  
39  
40  
41  
42  
43  
44  
45  
46  
47  
48  
49  
50  
51  
52  
53  
54  
55  
56  
57  
58  
59  
60

For peer review only

## 1 METHODS

### 2 Study setting and population

3 This prospective multicenter study included patients who presented to one of the 4 participating  
4 Quebec EDs (two university-affiliated level 1 trauma centers and two regional hospitals)  
5 between March and July 2015. **Inclusion criteria** were: 1) Patients aged 65 and over; 2) Patients  
6 with an ED stay of  $\geq 8$  hours; 3) Patients needing and/or waiting for admission to any hospital  
7 ward; 4) Independent or semi-independent patients (able to perform 5/7 activities of daily living  
8 according to the Older Americans Resources and Services scale (OARS)). **Exclusion criteria**  
9 were: 1) Patient with unstable medical condition requiring admission to the psychiatric ward,  
10 intensive or palliative care units; 2) Patient who are unable to consent; 3) Patients who live (or  
11 are in transition) in a long-term care facility; 4) Patients unable to speak French or English;  
12 5) Patients presenting a delirium before coming to the ED, upon arrival or by the end of the first  
13 8 hours in the ED; 6) Patients with a history of psychiatric disorders (such as schizophrenia,  
14 psychotic symptoms and bipolar disorder).

15 Based on soon to be published new recommendations from the Direction Nationale des  
16 Urgences regarding older patients' lengths of ED stay, which should be kept under 8 hours, we  
17 choose an 8-hour exposure for our patients, as opposed to the 12-hour exposure previously  
18 determined to be a predictor of subsequent delirium (28-30). Our pragmatic approach led us to  
19 include patients who need or are awaiting admission to a hospital ward; since, Caplan *et al.*  
20 showed that patients admitted to hospital have a significantly at higher proportion of delirium  
21 than their equivalent counterparts discharged and treated with home resources.(35) Also, even if  
22 we know that delirium is more prevalent in this population, we chose to exclude patients who are  
23 not independent or semi-independent, because we were mainly interested to investigate the  
24 impact of delirium on the most robust older patients. In addition, we chose to exclude patients  
25 who were unable to consent, because assessing initial interview and follow-up with those  
26 patients would have been difficult.

27 Potential participants were identified using the emergency department information system.  
28 Research assistants (RAs) obtained consent and screened the participants for eligibility after their  
29 8-hour exposure to the ED. Sociodemographic, medical and comorbidity data were collected  
30 upon initial interview. RAs also assessed patients' baseline physical, frailty and cognitive status.  
31 Patients were screened for delirium during initial interview, and twice a day (with at least  
32 6 hours between each evaluation) during their entire ED stay and up to 24 hours after being  
33 admitted to a hospital ward. We assessed the patient up to 24h on the basis that a patient who  
34 develop a delirium let say an hour after arrival on the ward is most likely due to the 48 hours in the ED  
35 than the first hour on the ward. We kept this evaluation for possible causality purposes. Potential  
36 participants were considered as "missed" when they was no RA on-site for the recruitment. RAs  
37 were on site for the screening of patients about 12 hours a day, 7 days a week.

### 38 Measures

39 Patients' frailty and physical status were assessed using respectively the Clinical Frailty Scale  
40 (CFS) (36) and the Older Americans Resources and Services scale (OARS)(37),while the

1  
2  
3 1 Telephone Interview for Cognitive Status-modified (TICS-m),(38) the Confusion Assessment  
4 2 Method (CAM) (39) and the Delirium Index (40), were used to assess cognitive status. Other  
5 3 information on medications, comorbidities (Charlson comorbidity risk index) (41), severity of  
6 4 illness (Acute Physiological and Chronic Health Evaluation II (APACHE II) (42) and ED  
7 5 environment evaluation were collected in addition to sociodemographic data.

8  
9  
10 6 The CAM is the most commonly used tool for the detection of delirium with its sensitivity  
11 7 ranging between 34% and 58% and its specificity between 89% and 94% when performed by a  
12 8 research assistant. However, even if this sensitivity seems low, it has been shown that when the  
13 9 CAM is administered several times during a shift, it is more sensitive than a diagnosis made by a  
14 10 psychiatrist.(43) There are two existing interpretation methods to the CAM scores: the sensitive  
15 11 (SENS) and the specific (SPEC) methods.(44) A patient has delirium according to the SENS  
16 12 method if they: had either an acute onset or a fluctuation in any of the items evaluated in the  
17 13 CAM, inattention and either disorganized thinking or altered state of consciousness.(25) The  
18 14 SENS method was used to ascertain delirium in this study. Because of the fluctuating nature of  
19 15 delirium, patients were systematically assessed with the CAM and the Delirium Index (a  
20 16 validated tool used to measure the severity of delirium) (40) twice a day during their entire ED  
21 17 stay. Furthermore, the CAM was used over a 24-hour period following transfer to the hospital  
22 18 ward. ED and ward nurses and doctors were blinded to the study's objectives in order to avoid  
23 19 them changing their practice. The TICS-m was used to assess baseline cognitive status of our  
24 20 study participants.(45) ED environmental information, such as presence of proper lighting  
25 21 (according to the RAs), patient's hydration, presence of physical restraints or medical  
26 22 interventions limiting movement at initial interview and presence of a family member or a friend  
27 23 at initial interview was also recorded by RAs. ED LOS was measured from the date and time of  
28 24 triage up to the date and time when the patients were physically transferred to the hospital ward.

29  
30  
31 25 Each site's team of RAs received standardized training by an experienced member of the  
32 26 mentoring team of the *Centre d'Excellence sur le Vieillissement de Québec*(46), who also  
33 27 specializes in the administration of the CAM. They also attended a group training session  
34 28 conducted by the study coordinator and an experienced research nurse and underwent a 5-hour  
35 29 personalized field training. They were also provided with a detailed training manual. Inter-rater  
36 30 reliability was assessed during patient follow-ups at the coordinating site to ensure that the test  
37 31 was administered in a standardized manner.

38  
39  
40 32 In order to be sure that the missed patients were similar to our participants, basic clinical and  
41 33 demographic data were collected on those missed patients. The incidence of delirium was also  
42 34 collected for those patients in their medical file, as reported by the ED medical staff.

## 43 44 45 46 47 48 35 **Outcomes**

49  
50 36 Incident delirium was the main outcome of this study, hospital LOS was our secondary outcome.  
51 37 Incident delirium was defined by a delirium who occurred either in the ED or in the first 24  
52 38 hours of the hospital stay. The CAM was administrated during the initial interview ensuring that  
53 39 the patient was not already delirious after the first 8 hours of their ED stay.

1  
2  
3 1 Hospital LOS was also measured from ED triage up to the date and time of hospital discharge.  
4 2 Hospital LOS was compared between patients with a positive CAM and those with a negative  
5 3 CAM for each site.  
6

#### 7 4 **Statistical analyses**

8  
9 5 Descriptive statistics were computed on patient characteristics and measured outcomes.  
10 6 Cumulative incidence rates for delirium were estimated using Kaplan-Meier curves. Hospital  
11 7 LOS is compared in patients with and without incident delirium in the various sites using  
12 8 multiple linear regression, adjusting for ED LOS, APACHE, Charlson, OARS, age and TICS-m.  
13 9 Site and its interaction with incident delirium is treated as a fixed factor. TICS-m scores were  
14 10 adjusted for patients' level of education. Kappa statistics were computed to measure inter-rater  
15 11 reliability of the CAM. Based on an alpha of 5%, 138 patients would allow 80% power for an  
16 12 estimated overall incidence proportion of 15 % with 5% precision. Analyses were performed  
17 13 using SAS, version 9.4 (SAS Institute, Inc., Cary, NC).

18 14 The Comité d'éthique du CHU de Québec acted as the centralized research ethics board and  
19 15 approved this study (project # MP-20-2015-2130). Written consent was obtained for each study  
20 16 participant. Patient records/information were anonymized prior to analysis.  
21  
22  
23  
24  
25  
26  
27  
28  
29  
30  
31  
32  
33  
34  
35  
36  
37  
38  
39  
40  
41  
42  
43  
44  
45  
46  
47  
48  
49  
50  
51  
52  
53  
54  
55  
56  
57  
58  
59  
60

## 1 RESULTS

### 2 Population

3 A total of 2699 patients were screened by research assistants across our 4 sites (figure 1). Of  
4 those, 1780 did not meet our inclusion criteria or had one of our exclusion criteria, 417 were  
5 missed and 164 refused to participate to the study. This leaves us with a sample of 338 patients  
6 (12.5%). Females represented 51.2% of our population and mean age was 76.8 ( $\pm 8.09$ ) (table 1).

7 A sample analysis of patients who were missed revealed that they had a similar profile to that of  
8 those who were included in our study. 54.9% were female, with a mean age of 77.4 ( $\pm 9.4$ ) years  
9 old. The mean Charlson Comorbidity Score was 1.7 ( $\pm 1.7$ ), 36.7% were considered level 1 or 2  
10 on the Canadian Triage Assessment Scale (CTAS) and 38% were level 3. The medical notes  
11 revealed only one case of incident delirium within 24 hours of triage for this group of patients.  
12 Table 1 provides details on sociodemographic and environmental variables.

### 13 Incidence of delirium

14 In our cohort, we found that the overall incidence of delirium was 12.1% (n=41) using the SENS  
15 method, overall incidence and its distribution across sites are provided in figure 2. Fourteen cases  
16 occurred in the ED, while 27 cases occurred on the ward. Our results indicate that the delirium  
17 incidence rate was 2.9 cases per 1000 patient-hours. Figure 3 shows a cumulative incidence of  
18 delirium curve. Median ED LOS before developing a delirium was 45.2 h (38.0-52.5). Inter-rater  
19 agreements were performed at the coordinating site on 12% of the site's participants. A perfect  
20 agreement was obtained regarding the incidence of delirium, and agreement for each of the CAM  
21 items had Kappa ranging between 0.63 and 1.0.

### 22 Hospital length of stay

23 Median (IQR) hospital LOS was 146.6 (75.2-267.8) hours. On average, adjusted hospital LOS  
24 was 209 hours (8.7 days) for non-delirious participants while patients who were found to have  
25 incident delirium had a 314.4-hour (13.1 days) hospital stay. The hospital LOS for each site are  
26 shown in Figure 4. Mean hospital adjusted LOS was significantly increased by 105.4 hours (4.4  
27 days) in the delirious patients compared to non-delirious patient ( $p=0.003$ ).

28

## 1 DISCUSSION

2 Our study is, to our knowledge, the first large Canadian prospective study aiming to determine  
3 the incidence of delirium induced by ED stay in older patients and then to analyze its impacts on  
4 the length of in-hospital stay. We found a 12.1% incidence for delirium in our cohort of  
5 338 older patients. Our study determined that there was a statistically significant association  
6 between incident delirium and hospital LOS, which was increased by 4.4 days in patients with  
7 incident delirium.

8 Our results confirm the clinical importance of incident delirium in acute medicine care. A  
9 previous Canadian retrospective study was conducted by our team(47) using a chart-based  
10 CAM,(48) in which an 18% incidence of delirium was found in 200 patients medical charts. Half  
11 of those patients developed a delirium within 36 hours of arrival to the ED. It was shown  
12 previously that in prevalent delirious older ED patients that delirium is a predictor of prolonged  
13 hospital LOS (31). With our results, we confirm that incident delirium also has such result.  
14 However, contrary to prevalent delirium, it is possible to change the interventions in hospital to  
15 prevent this episode that has been shown to influence hospital LOS and long-term function and  
16 cognition (49).

17 In 2011, the Ministère de la Santé et des Services Sociaux has published its provincial guide  
18 "Approche adaptée à la personne âgée en milieu hospitalier", (50) a senior-friendly initiative  
19 which aimed to better address the in-hospital care of elders. This initiative stresses the  
20 importance of keeping lengths of stay as short as possible for older adults and presents various  
21 methods to prevent delirium. Every hospital in the province has implemented these guidelines at  
22 different levels. However, our results show that over 4 years post-implementation, ED lengths of  
23 stay for older patients are still quite significant in Quebec, increasing their risk of developing  
24 delirium according to previous studies. Our results also clearly confirm the fact that patients with  
25 incident delirium have longer hospital length of stay, making them more at risk for further  
26 complications. We also recorded an important difference in incident delirium across the 4 study  
27 sites, varying from 8.3% to 20%. Although inter-site comparisons were not powered by our  
28 sample size, many factors could have explained this difference. The different level of  
29 implementation of the provincial senior-friendly guidelines at each site could be a possible cause.

30  
31 This study aimed at assessing the present situation in our Canadian EDs regarding the incidence  
32 of delirium induced by a prolonged ED-stay in independent and semi-independent older patients.  
33 The high incidence rate and increased hospital LOS are alarming and could have substantial  
34 consequences for the patient and for our health care system in general. Delirium itself is an  
35 economic burden in the United States as it is estimated to 152\$ billion per year.(31)

36 An interesting solution to this issue might be the use of a short triage tool aiming to identify  
37 patients more at risk of developing a delirium during their ED stay. Delaney *et al.* found that  
38 implementing an alert into the EMR system for triage nurses to screen every patient over 65  
39 years old for delirium helped ED nurses better identify 23% of patients as potentially positive for  
40 delirium.(32) However, more research is needed in order to identify an appropriate tool to be  
41 used by triage nurses. A better identification of patients at high risk for delirium could permit to  
42 apply some prevention protocols previously proposed (51).

1  
2  
3 1 Our study has some limitations. Our high rate of missed patients is mainly due to logistic  
4 2 constraints. However, after comparing the socio-demographic characteristics and comorbidities,  
5 3 we have found no significant difference between patients who were included and those who were  
6 4 missed. Furthermore, including those missed patients would likely have reinforced our results,  
7 5 resulting in higher delirium rates and longer ED and hospital LOS. Therefore, we believe the  
8 6 likelihood of selection bias is low. Because we have chosen to exclude patients with moderate to  
9 7 severe dementia, those who lived in long-term nursing homes, those with pre-existing  
10 8 psychological conditions and patients who had a lesser functional level, our cohort represents  
11 9 only a portion of the older adults population usually seen in the ED and may not be generalizable  
12 10 to all elders. We have made this decision because we were mainly interested to investigate the  
13 11 impact of delirium on the most robust older patients. The CAM was administered by different  
14 12 research assistants, and therefore this might have underestimated or overestimated the frequency  
15 13 of an acute onset of a new symptom. Misclassification of delirium may have occurred as we  
16 14 excluded patient with delirium using a single first initial assessment with CAM, this pragmatic  
17 15 approach was used to ensure feasibility of the study. This may have introduced an interviewer  
18 16 bias; however, this situation is not any different from real-life clinical practice. We tried to  
19 17 decrease this potential bias by providing research assistants with standardized training, which  
20 18 was proven effective given our good inter-observer agreement. The study coordinator also  
21 19 reviewed every single research file to ensure completeness.

22  
23  
24  
25  
26  
27  
28  
29 21 In conclusion, the incidence of delirium was 12.1% in community dwelling older adults enrolled  
30 22 from 4 Canadian EDs. Incident delirium significantly increased hospital length of stay by 4 days  
31 23 and could possibly negatively affect the patient and healthcare system.

32  
33  
34  
35 25 **Grant:** This study was funded by the Fond Québécois de Recherche en Santé (FQRS 29307).

36  
37 26 **Conflicts of interest:** None

38  
39 27 **Acknowledgements:** We would like to thank all the research assistants who participated in the  
40 28 recruitment of patients.

41  
42  
43 29 **Data sharing statement:** Being a prospective observational multicentre study, this project  
44 30 includes other data results to be solely used by our research team. The data use is guide by a  
45 31 public funding agency - FQRS

## 1 REFERENCES

1. Gouvernement du Québec - Institut de la statistique du Québec. Le bilan démographique du Québec. 2016.
2. Heffler S, Levitt K, Smith S, Smith C, Cowan C, Lazenby H, et al. Health spending growth up in 1999; Faster growth expected in the future. *Health affairs*. 1999;20(2):193-203.
3. Data warehouse on trends in health and aging 2002. Available from: [www.cdc.gov/nchs/about/otheract/aging/trenddata.htm](http://www.cdc.gov/nchs/about/otheract/aging/trenddata.htm).
4. Mathews M, Barnsley J. Patients seeking care during acute illness. Why do they not see their regular physicians? *Can Fam Physician*. 2003;49:1498-503. PubMed PMID: 14649989.
5. Hahn B, Lefkowitz D. Annual expenses and sources of payment for health care services. Rockville, MD: Agency For Health Care Policy and Research, Public Health Service, 1992 14 DHHS Pub. No AHCPR 93-0007.
6. Le Commissaire à la santé et au bien-être (CSBE). Les Urgences au Québec : Évolution de 2003-2004 à 2012-2013. 2014.
7. Burt CW, McCaig LF. Trends in hospital emergency department utilization: United States, 1992-99. *Vital Health Stat* 13. 2001(150):1-34. PubMed PMID: 11577602.
8. McCaig LF, Burt CW. National Hospital Ambulatory Medical Care Survey: 2002 emergency department summary. *Adv Data*. 2004(340):1-34. PubMed PMID: 15068333.
9. Delafuente JC. The silver tsunami is coming: will pharmacy be swept away with the tide? *American journal of pharmaceutical education*. 2009;73(1):1. PubMed PMID: 19513138; PubMed Central PMCID: PMC2690864.
10. Hwang U, Morrison RS. The geriatric emergency department. *J Am Geriatr Soc*. 2007;55(11):1873-6. Epub 2007/10/06. doi: 10.1111/j.1532-5415.2007.01400.x. PubMed PMID: 17916122.
11. Baraff LJ, Bernstein E, Bradley K, Franken C, Gerson LW, Hannegan SR, et al. Perceptions of emergency care by the elderly: results of multicenter focus group interviews. *Ann Emerg Med*. 1992;21(7):814-8. PubMed PMID: 1610038.
12. Moons P, Arnauts H, Delooz HH. Nursing issues in care for the elderly in the emergency department: an overview of the literature. *Accid Emerg Nurs*. 2003;11(2):112-20. PubMed PMID: 12633630.
13. Hedges JR, Singal BM, Rousseau EW, Sanders AB, Bernstein E, McNamara RM, et al. Geriatric patient emergency visits. Part II: Perceptions of visits by geriatric and younger patients. *Ann Emerg Med*. 1992;21(7):808-13. Epub 1992/07/01. doi: S0196-0644(05)81026-1 [pii]. PubMed PMID: 1610037.
14. Boulton C, Dowd B, McCaffrey D, Boulton L, Hernandez R, Krulwich H. Screening elders for risk of hospital admission. *Journal of the American Geriatrics Society*. 1993;41(8):811-7. PubMed PMID: 8340558.
15. Friedmann PD, Jin L, Karrison TG, Hayley DC, Mulliken R, Walter J, et al. Early revisit, hospitalization, or death among older persons discharged from the ED. *Am J Emerg Med*. 2001;19(2):125-9. PubMed PMID: 11239256.
16. Marcantonio ER, McKean S, Goldfinger M, Kleefield S, Yurkofsky M, Brennan TA. Factors associated with unplanned hospital readmission among patients 65 years of age and older in a Medicare managed care plan. *Am J Med*. 1999;107(1):13-7. PubMed PMID: 10403347.
17. Speechley M, Tinetti M. Falls and injuries in frail and vigorous community elderly persons. *Journal of the American Geriatrics Society*. 1991;39(1):46-52. PubMed PMID: 1987256.
18. Aminzadeh F, Dalziel WB. Older adults in the emergency department: a systematic review of patterns of use, adverse outcomes, and effectiveness of interventions. *Ann Emerg Med*. 2002;39(3):238-47. PubMed PMID: 11867975.



19. Hustey FM, Meldon SW. The prevalence and documentation of impaired mental status in elderly emergency department patients. *Ann Emerg Med.* 2002;39(3):248-53. PubMed PMID: 11867976.
20. Han JH, Zimmerman EE, Cutler N, Schnelle J, Morandi A, Dittus RS, et al. Delirium in older emergency department patients: recognition, risk factors, and psychomotor subtypes. *Acad Emerg Med.* 2009;16(3):193-200. Epub 2009/01/22. doi: 10.1111/j.1553-2712.2008.00339.x. PubMed PMID: 19154565; PubMed Central PMCID: PMCPMC5015887.
21. Elie M, Rousseau F, Cole M, Primeau F, McCusker J, Bellavance F. Prevalence and detection of delirium in elderly emergency department patients. *CMAJ : Canadian Medical Association journal = journal de l'Association medicale canadienne.* 2000;163(8):977-81. Epub 2000/11/09. PubMed PMID: 11068569; PubMed Central PMCID: PMC80546.
22. Cole MG. Delirium in elderly patients. *The American journal of geriatric psychiatry : official journal of the American Association for Geriatric Psychiatry.* 2004;12(1):7-21. PubMed PMID: 14729554.
23. Han JH, Wilber ST. Altered mental status in older patients in the emergency department. *Clinics in geriatric medicine.* 2013;29(1):101-36. Epub 2012/11/28. doi: 10.1016/j.cger.2012.09.005. PubMed PMID: 23177603; PubMed Central PMCID: PMCPMC3614410.
24. Fick DM, Agostini JV, Inouye SK. Delirium superimposed on dementia: a systematic review. *J Am Geriatr Soc.* 2002;50(10):1723-32. PubMed PMID: 12366629.
25. Lemienre J, Nelis T, Joosten E, Braes T, Foreman M, Gastmans C, et al. Detection of delirium by bedside nurses using the confusion assessment method. *J Am Geriatr Soc.* 2006;54(4):685-9. Epub 2006/05/12. doi: 10.1111/j.1532-5415.2006.00667.x. PubMed PMID: 16686883.
26. Voyer P, Richard S, Doucet L, Carmichael PH. Detecting delirium and subsyndromal delirium using different diagnostic criteria among demented long-term care residents. *Journal of the American Medical Directors Association.* 2009;10(3):181-8. PubMed PMID: 19233058.
27. Inouye SK, Westendorp RG, Saczynski JS. Delirium in elderly people. *Lancet.* 2014;383(9920):911-22. Epub 2013/09/03. doi: S0140-6736(13)60688-1 [pii] 10.1016/S0140-6736(13)60688-1. PubMed PMID: 23992774.
28. Inouye SK, Viscoli CM, Horwitz RI, Hurst LD, Tinetti ME. A predictive model for delirium in hospitalized elderly medical patients based on admission characteristics. *Ann Intern Med.* 1993;119(6):474-81. PubMed PMID: 8357112.
29. Inouye SK, Charpentier PA. Precipitating factors for delirium in hospitalized elderly persons. Predictive model and interrelationship with baseline vulnerability. *Jama.* 1996;275(11):852-7. PubMed PMID: 8596223.
30. Bo M, Bonetto M, Bottignole G, Porrino P, Coppo E, Tibaldi M, et al. Length of Stay in the Emergency Department and Occurrence of Delirium in Older Medical Patients. *J Am Geriatr Soc.* 2016;64(5):1114-9. Epub 2016/05/11. doi: 10.1111/jgs.14103. PubMed PMID: 27160482.
31. Han JH, Eden S, Shintani A, Morandi A, Schnelle J, Dittus RS, et al. Delirium in older emergency department patients is an independent predictor of hospital length of stay. *Acad Emerg Med.* 2011;18(5):451-7. Epub 2011/04/28. doi: 10.1111/j.1553-2712.2011.01065.x. PubMed PMID: 21521405; PubMed Central PMCID: PMCPMC3768130.
32. Delaney M, Pepin J, Somes J. Emergency Department Delirium Screening Improves Care and Reduces Revisits for the Older Adult Patient. *J Emerg Nurs.* 2015;41(6):521-4. Epub 2015/09/28. doi: 10.1016/j.jen.2015.08.013. PubMed PMID: 26409656.
33. McCusker J, Cole MG, Dendukuri N, Belzile E. Does delirium increase hospital stay? *J Am Geriatr Soc.* 2003;51(11):1539-46. Epub 2003/12/23. PubMed PMID: 14687382.
34. Forster AJ, Stiell I, Wells G, Lee AJ, van Wieringen C. The effect of hospital occupancy on emergency department length of stay and patient disposition. *Academic Emergency Medicine.* 2003;10:127-33.

- 1  
2  
3 1 35. Caplan GA, Coconis J, Woods J. Effect of hospital in the home treatment on physical and  
4 2 cognitive function: a randomized controlled trial. *J Gerontol A Biol Sci Med Sci*. 2005;60(8):1035-8. Epub  
5 3 2005/08/30. doi: 60/8/1035 [pii]. PubMed PMID: 16127109.
- 6 4 36. Rockwood K, Song X, MacKnight C, Bergman H, Hogan DB, McDowell I, et al. A global clinical  
7 5 measure of fitness and frailty in elderly people. *CMAJ : Canadian Medical Association journal = journal  
8 6 de l'Association medicale canadienne*. 2005;173(5):489-95. Epub 2005/09/01. doi: 173/5/489 [pii]  
10 7 10.1503/cmaj.050051. PubMed PMID: 16129869; PubMed Central PMCID: PMC1188185.
- 11 8 37. Fillenbaum GG, Duke U. Multidimensional functional assessment of older adults: the Duke Older  
12 9 Americans Resources and Services procedures. Hillsdale, NJ: L. Erlbaum Associates; 1988. xii, 179 p. p.
- 13 10 38. de Jager C, Budge M, Clarke R. Utility of TICS-M for the assessment of cognitive function in older  
14 11 adults. *International journal of geriatric psychiatry*. 2003;18(4):318-24.
- 15 12 39. Inouye SK, van Dyck CH, Alessi CA, Balkin S, Siegel AP, Horwitz RI. Clarifying confusion: the  
16 13 confusion assessment method. A new method for detection of delirium. *Ann Intern Med*.  
17 14 1990;113(12):941-8. PubMed PMID: 2240918.
- 18 15 40. McCusker J, Cole MG, Dendukuri N, Belzile E. The delirium index, a measure of the severity of  
19 16 delirium: new findings on reliability, validity, and responsiveness. *J Am Geriatr Soc*. 2004;52(10):1744-9.  
20 17 Epub 2004/09/29. doi: 10.1111/j.1532-5415.2004.52471.x. PubMed PMID: 15450055.
- 21 18 41. Frenkel WJ, Jongerius EJ, Mandies-van Uiter MJ, van Munster BC, De Rooij SE. Validation of the  
22 19 Charlson comorbidity index in acutely hospitalized elderly adults: a prospective cohort study. *Journal of  
23 20 the American Geriatrics Society*. 2014;62(2):342-246. doi: 10.1111/jgs.12635.
- 24 21 42. Knaus WA, Draper EA, Wagner DP, Zimmerman JE. APACHE II: a severity of disease classification  
25 22 system. *Critical Care Medicine*. 1985;13(10):818-29.
- 26 23 43. Zou Y, Cole MG, Primeau FJ, McCusker J, Bellavance F, Laplante J. Detection and diagnosis of  
27 24 delirium in the elderly: psychiatrist diagnosis, confusion assessment method, or consensus diagnosis?  
28 25 *International psychogeriatrics / IPA*. 1998;10(3):303-8. Epub 1998/10/24. PubMed PMID: 9785149.
- 29 26 44. Inouye S. *CAM Training Manual*. New Haven, CT: Yale University School of Medicine; 1991.
- 30 27 45. Herr M, Ankri J. A critical review of the use of telephone tests to identify cognitive impairment in  
31 28 epidemiology and clinical research. *Journal of telemedicine and telecare*. 2013;19(1):45-54. Epub  
32 29 2013/02/08. doi: 10.1177/1357633x12474962. PubMed PMID: 23390209.
- 33 30 46. Centre intégré universitaire de santé et de services sociaux de la Capitale-Nationale. Centre  
34 31 d'excellence sur le vieillissement de Québec [May 1 2017]. Available from: [https://www.ciussc-  
35 32 capitalenationale.gouv.qc.ca/expertise-et-partenariat/le-centre-dexcellence-sur-le-vieillessement-de-  
36 33 quebec](https://www.ciussc-capitalenationale.gouv.qc.ca/expertise-et-partenariat/le-centre-dexcellence-sur-le-vieillessement-de-quebec).
- 37 34 47. Émond M, Grenier D, Morin J, Eagles D, Boucher V, Le Sage N, et al. Emergency Department stay  
38 35 associated delirium in older patients. *Canadian Geriatrics Journal*. 2017;20(1).
- 39 36 48. Inouye SK, Leo-Summers L, Zhang Y, Bogardus ST, Jr., Leslie DL, Agostini JV. A chart-based  
40 37 method for identification of delirium: validation compared with interviewer ratings using the confusion  
41 38 assessment method. *J Am Geriatr Soc*. 2005;53(2):312-8. PubMed PMID: 15673358.
- 42 39 49. Han JH, Vasilevskis EE, Chandrasekhar R, Liu X, Schnelle JF, Dittus RS, et al. Delirium in the  
43 40 Emergency Department and Its Extension into Hospitalization (DELINEATE) Study: Effect on 6-month  
44 41 Function and Cognition. *The American Geriatrics Society*. 2017;65:1333-8. doi: 10.1111/jgs.14824.
- 45 42 50. Ministère de la Santé et des Services Sociaux. Approche adaptée à la personne âgée en milieu  
46 43 hospitalier - Cadre de référence. 2011.
- 47 44 51. Abraha I, Trotta F, Rimland J, Cruz-Jentoft A, Lozano-Montoya I, Soiza R, et al. Efficacy of Non-  
48 45 Pharmacological Interventions to Prevent and Treat Delirium in Older Patients: A Systematic Overview.  
49 46 The SENATOR project ONTOP Series. *PLoS One*. 2015;10(6):1-31. doi: 10.1371/journal.pone.0123090

1  
2  
3  
4  
5  
6  
7  
8  
9  
10  
11  
12  
13  
14  
15  
16  
17  
18  
19  
20  
21  
22  
23  
24  
25  
26  
27  
28  
29  
30  
31  
32  
33  
34  
35  
36  
37  
38  
39  
40  
41  
42  
43  
44  
45  
46  
47  
48  
49  
50  
51  
52  
53  
54  
55  
56  
57  
58  
59  
60

1

For peer review only

## 1 TABLES

2 Table 1. Description of the study population

|                                    | Site 1<br>n(%) | Site 2<br>n(%) | Site 3<br>n(%) | Site 4<br>n(%) | Site comparison<br>p-value | Total       |
|------------------------------------|----------------|----------------|----------------|----------------|----------------------------|-------------|
| <b>Age</b>                         |                |                |                |                |                            |             |
| 65-74 y/o                          | 61 (57)        | 21 (32)        | 38 (45)        | 35 (42)        | 0.001                      | 155 (46)    |
| 75-84 y/o                          | 36 (34)        | 23 (35)        | 35 (42)        | 29 (35)        |                            | 123 (36)    |
| ≥85 y/o                            | 9 (9)          | 21 (32)        | 11 (13)        | 19 (23)        |                            | 60 (18)     |
| <b>Sex</b>                         |                |                |                |                |                            |             |
| Female                             | 53 (50)        | 37 (57)        | 39 (46)        | 44 (53)        | 0.618                      | 173 (51)    |
| <b>CTAS</b>                        |                |                |                |                |                            |             |
| 1 & 2                              | 39 (37)        | 25 (38)        | 25 (30)        | 18 (22)        | 0.076                      | 107 (31,7)  |
| 3                                  | 47 (44)        | 28 (43)        | 43 (51)        | 37 (45)        |                            | 155 (45,9)  |
| 4 & 5                              | 20 (19)        | 12 (18)        | 16 (19)        | 28 (34)        |                            | 76 (22,5)   |
| <b>Admission diagnostic</b>        |                |                |                |                |                            |             |
| <b>Medical</b>                     |                |                |                |                |                            |             |
| Cardiology                         | 15 (14.0)      | 16 (21.9)      | 23 (25.2)      | 16 (18.0)      |                            | 70 (19.4)   |
| Pneumonology                       | 22 (20.6)      | 15 (20.5)      | 26 (28.6)      | 12 (13.5)      |                            | 75 (20.8)   |
| Gastroenterology                   | 13 (12.1)      | 7 (9.6)        | 8 (8.8)        | 17 (19.1)      |                            | 45 (12.5)   |
| Internal medicine                  | 6 (5.6)        | 8 (11.0)       | 7 (7.7)        | 8 (9.0)        |                            | 29 (8.1)    |
| Neurology                          | 13 (12.1)      | 7 (9.6)        | 9 (9.9)        | 10 (11.2)      |                            | 39 (10.8)   |
| Other                              | 28 (26.2)      | 14 (19.2)      | 14 (15.4)      | 21 (23.6)      |                            | 77 (21.4)   |
| <b>Surgical</b>                    |                |                |                |                |                            |             |
| Orthopedics                        | 2 (1.9)        | 6 (8.2)        | 4 (4.4)        | 5 (5.6)        |                            | 17 (4.7)    |
| General surgery                    | 5 (4.7)        | 0 (0)          | 0 (0)          | 0 (0)          |                            | 5 (1.4)     |
| Other                              | 3 (2.8)        | 0 (0)          | 0 (0)          | 0 (0)          |                            | 3 (0.8)     |
| <b>Time of day of presentation</b> |                |                |                |                |                            |             |
| 0:00-8:00                          | 18 (16.5)      | 12 (16.2)      | 21 (22.1)      | 5 (5.6)        |                            | 56 (15.3)   |
| 8:00-16:00                         | 66 (60.6)      | 34 (46.0)      | 43 (45.3)      | 54 (60.7)      |                            | 197 (53.7)  |
| 16:00-0:00                         | 25 (22.9)      | 28 (37.8)      | 31 (32.6)      | 30 (33.7)      |                            | 114 (31.0)  |
| OARS at baseline (mean ± SD)       | 26.33 ±1.98    | 26.41 ±2.20    | 25.95 ±2.60    | 24.92 ±2.41    | <0.001                     | 25.91 ±2.36 |
| TICS-m at baseline (mean ± SD)*    | 30.36 ±5.68    | 31.88 ±4.69    | 29.37 ±5.92    | 26.81 ±6.70    | <0.001                     | 29.53 ±6.08 |
| Charlson (mean ± SD)               | 1.93 ±1.78     | 1.65 ±1.69     | 3.13 ±2.48     | 1.81 ±1.55     | <0.001                     | 2.14 ±1.99  |
| APACHE II (mean ± SD)              | 10.99 ±3.43    | 10.77 ±3.37    | 9.48 ±3.43     | 8.70 ±3.17     | <0.001                     | 10.01 ±3.48 |
| <b>Environmental factors</b>       |                |                |                |                |                            |             |
| Proper lighting <sup>a</sup>       | 65 (63)        | 49 (75)        | 71 (85)        | 18 (22)        | <0.001                     | 203 (61)    |
| <b>Patient hydration</b>           |                |                |                |                |                            |             |
| Fasting                            | 10 (10)        | 8 (12)         | 11 (13)        | 16 (19)        | 0.369                      | 45 (14)     |

|                                                |         |         |         |         |        |          |
|------------------------------------------------|---------|---------|---------|---------|--------|----------|
| Glass of water within reach                    | 70 (72) | 55 (85) | 52 (65) | 71 (86) | 0.005  | 248 (76) |
| Presence of saliva <sup>‡</sup>                | 74 (76) | 52 (80) | 49 (60) | 9 (11)  | <0.001 | 184 (56) |
| Any IV Fluids                                  | 75 (77) | 58 (89) | 78 (95) | 65 (78) | 0.003  | 276 (84) |
| <b>Physical restraints (any)<sup>+</sup></b>   | 78 (77) | 30 (46) | 1 (1)   | 65 (79) | <0.001 | 174 (53) |
| <b>Medical interventions limiting movement</b> |         |         |         |         |        |          |
| Bed rest                                       | 1 (1)   | 1 (2)   | 5 (6)   | 0 (0,0) | 0.071  | 7 (2)    |
| Urinary catheter                               | 7 (8)   | 5 (9)   | 2 (2)   | 2 (3)   | 0.217  | 16 (6)   |
| O2                                             | 15 (17) | 15 (26) | 22 (27) | 4 (6)   | 0.007  | 56 (19)  |
| Saline-lock Catheter or IV drip                | 72 (84) | 53 (91) | 75 (92) | 57 (88) | 0.377  | 257 (88) |
| Other                                          | 10 (12) | 8 (14)  | 18 (22) | 6 (9)   | 0.125  | 42 (14)  |
| <b>Temporal orientation aid<sup>•</sup></b>    | 67 (63) | 45 (69) | 53 (63) | 37 (45) | 0.010  | 202 (60) |

1 \* Adjusted for level of education

2 <sup>a</sup> According to the research assistant

3 <sup>‡</sup> Research assistant verified if the patients had saliva under their tongue

4 <sup>+</sup> Tablet, bed rails or other

5 <sup>•</sup> Clock, watch, cell phone, calendar

6 CTAS: Canadian Triage Assessment Scale; OARS: Older American's Resources and Services; TICS-m: Telephone  
7 Interview for Cognitive Status-modified; APACHE II: Acute Physiological and Chronic Health Evaluation  
8 II; IV: intravenous injection;

9

1  
2  
3 **1 FIGURES LEGEND**

4 **2 Figure 1. Study flowchart**

5  
6 **3 Figure 2. Distribution of delirium across participating sites**

7  
8 **4 Figure 3. Cumulative incidence of delirium curve**

9  
10 **5 Figure 4. Adjusted length of hospital stay (hours)\***

11  
12 \* Length of stay was adjusted for ED LOS, site, age, Charlson, APACHE, OARS and TICS-m  
13 scores. \*\*: Difference between No delirium and Incident delirium in terms of length of ED stay  
14 <0.05  
15

16  
17  
18  
19  
20  
21  
22  
23  
24  
25  
26  
27  
28  
29  
30  
31  
32  
33  
34  
35  
36  
37  
38  
39  
40  
41  
42  
43  
44  
45  
46  
47  
48  
49  
50  
51  
52  
53  
54  
55  
56  
57  
58  
59  
60

For peer review only

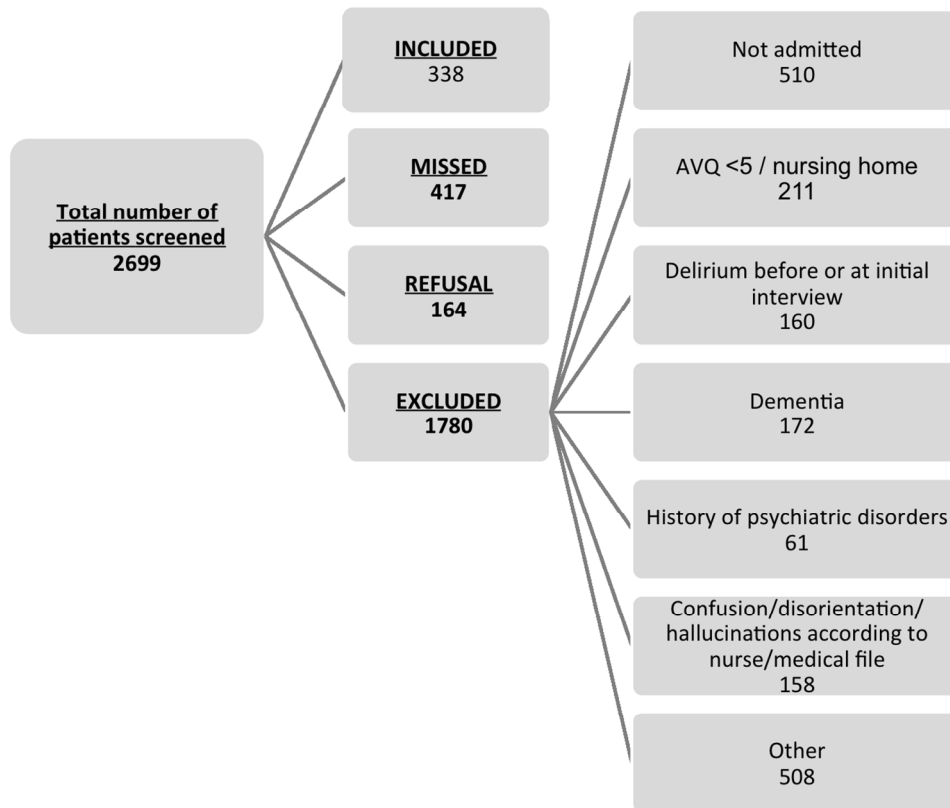

Peer review only

1  
2  
3  
4  
5  
6  
7  
8  
9  
10  
11  
12  
13  
14  
15  
16  
17  
18  
19  
20  
21  
22  
23  
24  
25  
26  
27  
28  
29  
30  
31  
32  
33  
34  
35  
36  
37  
38  
39  
40  
41  
42  
43  
44  
45  
46  
47  
48  
49  
50  
51  
52  
53  
54  
55  
56  
57  
58  
59  
60

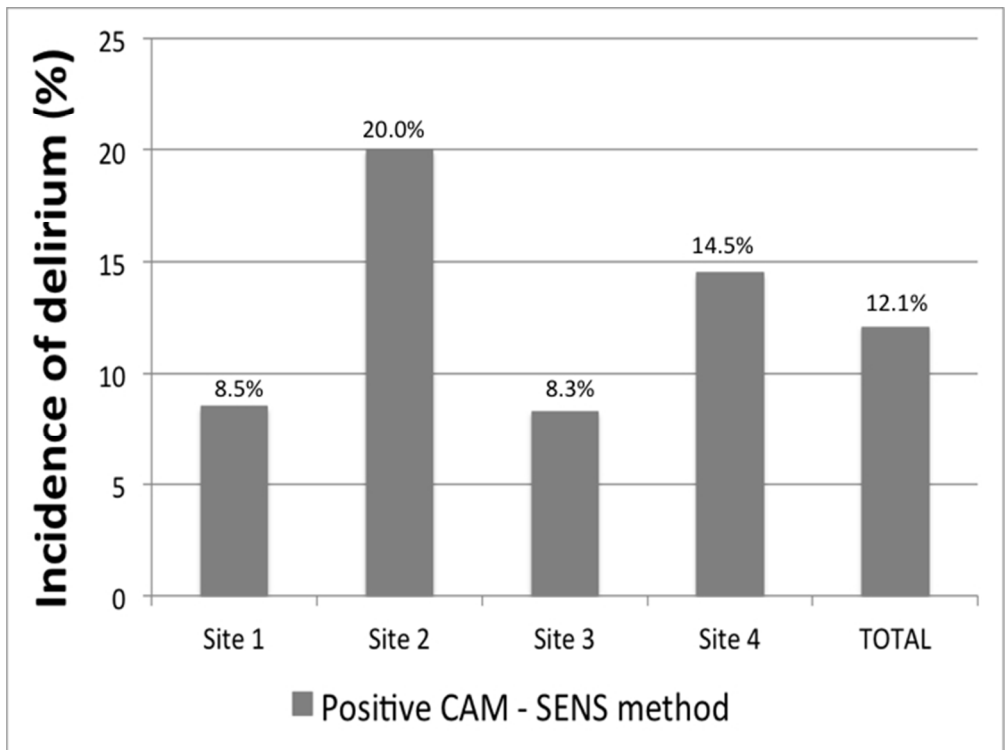

iew only



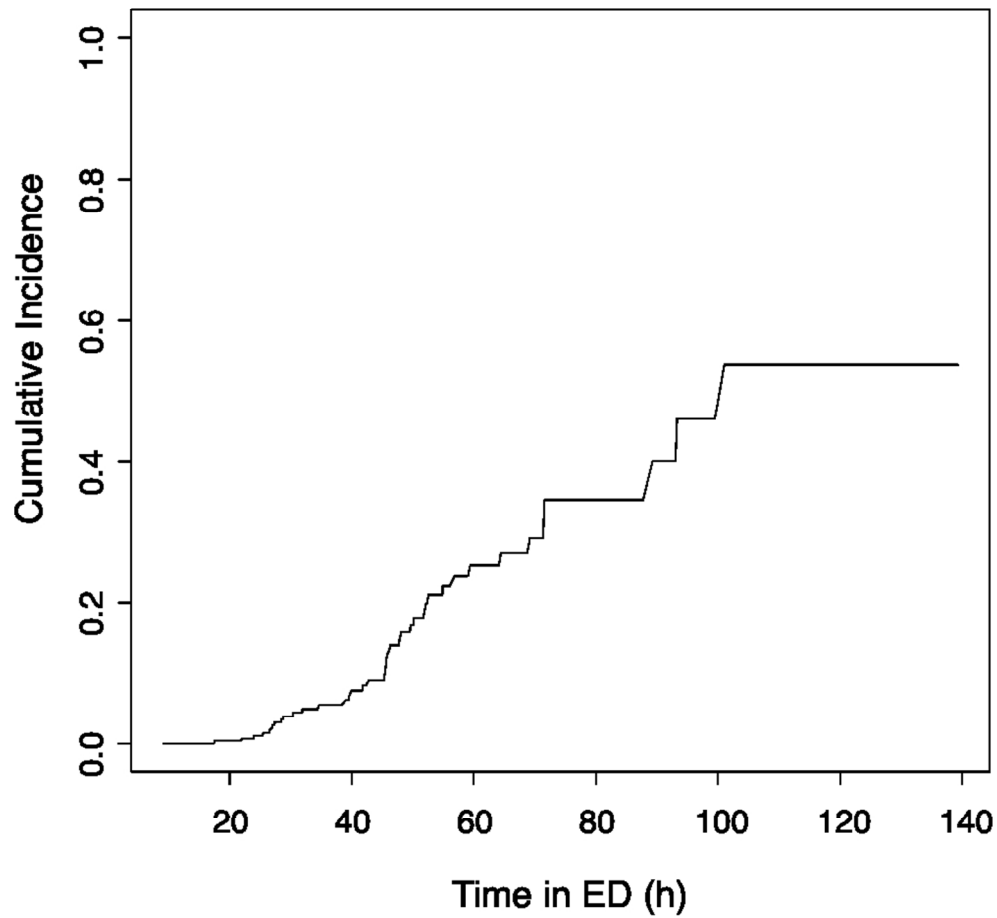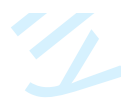

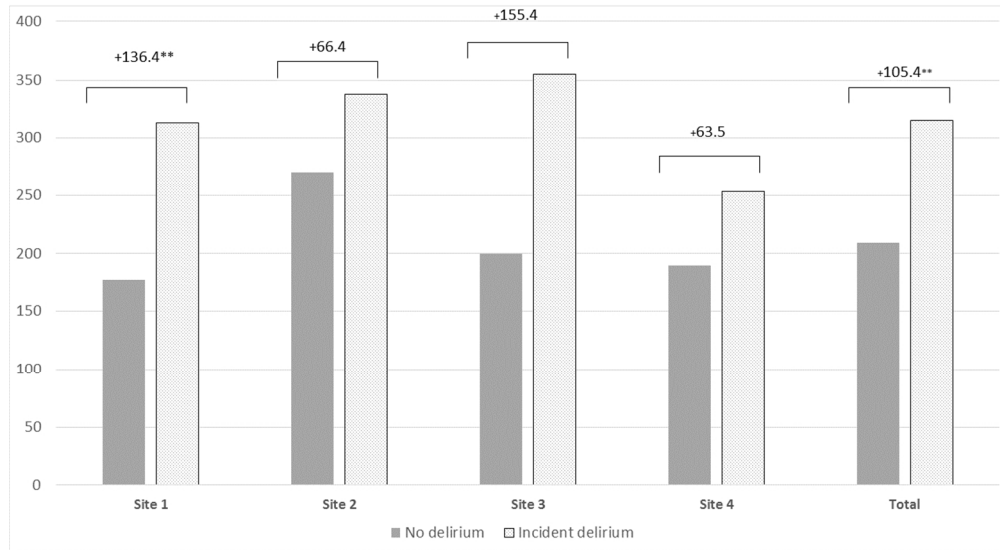

Length of stay was adjusted for site, age, Charlson, APACHE, OARS and TICS-m scores. \*\*: Difference between No delirium and Incident delirium in terms of length of ED stay <0.05

review only

**STROBE 2007 (v4) Statement—Checklist of items that should be included in reports of *cohort studies***

| Section/Topic                | Item # | Recommendation                                                                                                                                                                       | Reported on page # |
|------------------------------|--------|--------------------------------------------------------------------------------------------------------------------------------------------------------------------------------------|--------------------|
| Title and abstract           | 1      | (a) Indicate the study's design with a commonly used term in the title or the abstract                                                                                               | 2                  |
|                              |        | (b) Provide in the abstract an informative and balanced summary of what was done and what was found                                                                                  | 2                  |
| <b>Introduction</b>          |        |                                                                                                                                                                                      |                    |
| Background/rationale         | 2      | Explain the scientific background and rationale for the investigation being reported                                                                                                 | 4                  |
| Objectives                   | 3      | State specific objectives, including any prespecified hypotheses                                                                                                                     | 5                  |
| <b>Methods</b>               |        |                                                                                                                                                                                      |                    |
| Study design                 | 4      | Present key elements of study design early in the paper                                                                                                                              | 6                  |
| Setting                      | 5      | Describe the setting, locations, and relevant dates, including periods of recruitment, exposure, follow-up, and data collection                                                      | 6                  |
| Participants                 | 6      | (a) Give the eligibility criteria, and the sources and methods of selection of participants. Describe methods of follow-up                                                           | 6                  |
|                              |        | (b) For matched studies, give matching criteria and number of exposed and unexposed                                                                                                  | N/A                |
| Variables                    | 7      | Clearly define all outcomes, exposures, predictors, potential confounders, and effect modifiers. Give diagnostic criteria, if applicable                                             | 7                  |
| Data sources/<br>measurement | 8*     | For each variable of interest, give sources of data and details of methods of assessment (measurement). Describe comparability of assessment methods if there is more than one group | 7-8                |
| Bias                         | 9      | Describe any efforts to address potential sources of bias                                                                                                                            | 7-8                |
| Study size                   | 10     | Explain how the study size was arrived at                                                                                                                                            | 9                  |
| Quantitative variables       | 11     | Explain how quantitative variables were handled in the analyses. If applicable, describe which groupings were chosen and why                                                         | 7-8                |
| Statistical methods          | 12     | (a) Describe all statistical methods, including those used to control for confounding                                                                                                | 7-8                |
|                              |        | (b) Describe any methods used to examine subgroups and interactions                                                                                                                  | N/A                |
|                              |        | (c) Explain how missing data were addressed                                                                                                                                          | 9                  |
|                              |        | (d) If applicable, explain how loss to follow-up was addressed                                                                                                                       | N/A                |
|                              |        | (e) Describe any sensitivity analyses                                                                                                                                                | 8                  |
| <b>Results</b>               |        |                                                                                                                                                                                      |                    |

|                          |     |                                                                                                                                                                                                              |     |
|--------------------------|-----|--------------------------------------------------------------------------------------------------------------------------------------------------------------------------------------------------------------|-----|
| Participants             | 13* | (a) Report numbers of individuals at each stage of study—eg numbers potentially eligible, examined for eligibility, confirmed eligible, included in the study, completing follow-up, and analysed            | 9   |
|                          |     | (b) Give reasons for non-participation at each stage                                                                                                                                                         | 9   |
|                          |     | (c) Consider use of a flow diagram                                                                                                                                                                           | 9   |
| Descriptive data         | 14* | (a) Give characteristics of study participants (eg demographic, clinical, social) and information on exposures and potential confounders                                                                     | 9   |
|                          |     | (b) Indicate number of participants with missing data for each variable of interest                                                                                                                          | N/A |
|                          |     | (c) Summarise follow-up time (eg, average and total amount)                                                                                                                                                  | N/A |
| Outcome data             | 15* | Report numbers of outcome events or summary measures over time                                                                                                                                               | N/A |
| Main results             | 16  | (a) Give unadjusted estimates and, if applicable, confounder-adjusted estimates and their precision (eg, 95% confidence interval). Make clear which confounders were adjusted for and why they were included | 9   |
|                          |     | (b) Report category boundaries when continuous variables were categorized                                                                                                                                    | N/A |
|                          |     | (c) If relevant, consider translating estimates of relative risk into absolute risk for a meaningful time period                                                                                             | N/A |
| Other analyses           | 17  | Report other analyses done—eg analyses of subgroups and interactions, and sensitivity analyses                                                                                                               | N/A |
| <b>Discussion</b>        |     |                                                                                                                                                                                                              |     |
| Key results              | 18  | Summarise key results with reference to study objectives                                                                                                                                                     | 10  |
| <b>Limitations</b>       |     |                                                                                                                                                                                                              |     |
| Interpretation           | 20  | Give a cautious overall interpretation of results considering objectives, limitations, multiplicity of analyses, results from similar studies, and other relevant evidence                                   | 10  |
| Generalisability         | 21  | Discuss the generalisability (external validity) of the study results                                                                                                                                        | 11  |
| <b>Other information</b> |     |                                                                                                                                                                                                              |     |
| Funding                  | 22  | Give the source of funding and the role of the funders for the present study and, if applicable, for the original study on which the present article is based                                                | 1   |

\*Give information separately for cases and controls in case-control studies and, if applicable, for exposed and unexposed groups in cohort and cross-sectional studies.

**Note:** An Explanation and Elaboration article discusses each checklist item and gives methodological background and published examples of transparent reporting. The STROBE checklist is best used in conjunction with this article (freely available on the Web sites of PLoS Medicine at <http://www.plosmedicine.org/>, Annals of Internal Medicine at <http://www.annals.org/>, and Epidemiology at <http://www.epidem.com/>). Information on the STROBE Initiative is available at [www.strobe-statement.org](http://www.strobe-statement.org).
